1 **Evolved for success in novel environments: The round goby genome**

2

3 Irene Adrian-Kalchhauser<sup>1</sup>, Anders Blomberg<sup>2\*</sup>, Tomas Larsson<sup>3\*</sup>, Zuzana Musilova<sup>4\*</sup>, Claire R Peart<sup>5\*</sup>,  
4 Martin Pippel<sup>6\*</sup>, Monica Hongroe Solbakken<sup>7\*</sup>, Jaanus Suurväli<sup>8\*</sup>, Jean-Claude Walser<sup>9\*</sup>, Joanna  
5 Yvonne Wilson<sup>10\*</sup>, Magnus Alm Rosenblad<sup>2,11§</sup>, Demian Burguera<sup>4§</sup>, Silvia Gutnik<sup>12§</sup>, Nico Michiels<sup>13§</sup>,  
6 Mats Töpel<sup>2§</sup>, Kirill Pankov<sup>10§</sup>, Siegfried Schloissnig<sup>14§</sup>, Sylke Winkler<sup>6§</sup>

7

8 \* equal contribution, section lead authors, listed alphabetically

9 § co-authors with equal contribution, listed alphabetically

10

11 <sup>1</sup> Program Man-Society-Environment, Department of Environmental Sciences, University of Basel, Vesalgasse 1, 4051 Basel, Switzerland

12 <sup>2</sup> Department of Chemistry and Molecular Biology, University of Gothenburg, Medicinaregatan 9C, 41390 Gothenburg, Sweden

13 <sup>3</sup> Department of Marine Sciences, University of Gothenburg, Medicinaregatan 9C, 41390 Gothenburg, Sweden

14 <sup>4</sup> Department of Zoology, Charles University, Vinicna 7, CZ-128 44 Prague, Czech Republic

15 <sup>5</sup> Division of Evolutionary Biology, Faculty of Biology, Ludwig-Maximilians-Universität München, Grosshaderner Strasse 2, 82152 Planegg-  
16 Martinsried, Germany

17 <sup>6</sup> Max Planck Institute of Molecular Cell Biology and Genetics, Pfotenhauerstrasse 108, 01307 Dresden, Germany

18 <sup>7</sup> Centre for Ecological and Evolutionary Synthesis, University of Oslo, Blindernveien 31, 0371 Oslo, Norway

19 <sup>8</sup> Institute for Genetics, University of Cologne, Zùlpicher Strasse 47a, D-50674 Köln, Germany

20 <sup>9</sup> Genetic Diversity Centre, ETH, Universitätsstrasse 16, 8092 Zurich, Switzerland

21 <sup>10</sup> Department of Biology, McMaster University, 1280 Main Street West, Hamilton, ON, Canada

22 <sup>11</sup> NBIS Bioinformatics Infrastructure for Life Sciences, University of Gothenburg, Medicinaregatan 9C, 41390 Gothenburg, Sweden

23 <sup>12</sup> Biocenter, University of Basel, Klingelbergstrasse 50/70, 4056 Basel, Switzerland

24 <sup>13</sup> Institute of Evolution and Ecology, University of Tuebingen, Auf der Morgenstelle 28, 72076 Tübingen, Germany

25 <sup>14</sup> Research Institute of Molecular Pathology (IMP), Vienna BioCenter (VBC), 1030 Vienna, Austria.

26

27 **Corresponding author**

28 Irene Adrian-Kalchhauser

29 email: irene.adrian-kalchhauser@unibas.ch

30 mail: University of Basel, Vesalgasse 1, 4051 Basel

31 phone: +41 61 2070410

32

33 **Keywords**

34 PacBio, *Neogobius melanostomus*, invasive species, fish, genomics, evolution, adaptation, gene

35 duplication, vision, olfaction, innate immunity, detoxification, osmoregulation, epigenetics

36 **Abstract**

37

38 Since the beginning of global trade, hundreds of species have colonized territories outside of their  
39 native range. Some of these species proliferate at the expense of native ecosystems, i.e., have  
40 become invasive. Invasive species constitute powerful *in situ* experimental systems to study fast  
41 adaptation and directional selection on short ecological timescales. They also present promising case  
42 studies for ecological and evolutionary success in novel environments.

43

44 We seize this unique opportunity to study genomic substrates for ecological success and adaptability  
45 to novel environments in a vertebrate. We report a highly contiguous long-read based genome  
46 assembly for the most successful temperate invasive fish, the benthic round goby (*Neogobius*  
47 *melanostomus*), and analyse gene families that may promote its impressive ecological success.

48

49 Our approach provides novel insights from the large evolutionary scale to the small species-specific  
50 scale. We describe expansions in specific cytochrome P450 enzymes, a remarkably diverse innate  
51 immune system, an ancient duplication in red light vision accompanied by red skin fluorescence,  
52 evolutionary patterns in epigenetic regulators, and the presence of genes that may have contributed to  
53 the round goby's capacity to invade cold and salty waters.

54

55 A recurring theme across all analyzed gene families are gene expansions. This suggests that gene  
56 duplications may promote ecological flexibility, superior performance in novel environments, and  
57 underlie the impressive colonization success of the round goby. *Gobiidae* generally feature fascinating  
58 adaptations and are excellent colonizers. Further long-read genome approaches across the goby  
59 family may reveal whether the ability to conquer new habitats relates more generally to gene copy  
60 number expansions.

## 61 Introduction

62

63 Since the beginning of global trade and the colonial period, hundreds of species have colonized  
64 territories outside their native range. A fraction of those species proliferates at the expense of native  
65 species and ecosystems, i.e., they are invasive. While invasive species present challenges for  
66 biodiversity and ecosystem conservation, they also constitute exciting eco-evolutionary models for  
67 adaptation and ecological success in novel or changing environments (Bock *et al.* 2014; Prentis *et al.*  
68 2008; Tsutsui *et al.* 2000; Lee, 2002).

69

70 The benthic round goby *Neogobius melanostomus* (**Figure 1A**) is one of the most widespread invasive  
71 fish species. Since 1990, round gobies have been detected in over 20 countries outside their native  
72 Ponto-Caspian range. In some regions of Europe and North America, they have become the most  
73 common fish species (Jude *et al.* 1992; Michalek *et al.* 2012; Roche *et al.* 2013; **Figure 1B**). Lasting  
74 impacts on biodiversity and on ecosystems have been observed (see Hirsch *et al.* 2015 for a summary  
75 of the impacts). In recent years, the round goby has therefore become a novel model for ecology,  
76 behavior and evolution (**Figure 1C**).

77

78 The round goby effortlessly outcompetes native species with similar ecology, and is therefore a  
79 promising candidate to study fundamental questions on long-term ecological and evolutionary  
80 success. Round goby sequence data are presently restricted to a handful of phylogenetic markers  
81 (Dufour *et al.* 2007; Adrian-Kalchhauser *et al.* 2017; Feldheim *et al.* 2009; Neilson and Stepien, 2009;  
82 Bowley *et al.* 2010; Thacker and Roje, 2011; Thacker *et al.* 2011). However, genome analyses have  
83 previously provided significant insights into fish ecology and evolution. Examples are genome  
84 compaction (Aparicio *et al.* 2002), the transition from fin to limb (Amemiya *et al.* 2013), loss of major  
85 parts of adaptive immunity (Star *et al.* 2011), or effects of genome duplication (Li *et al.* 2015). We  
86 therefore expect relevant insights into round goby biology and into success in novel environments from  
87 the round goby genome sequence.

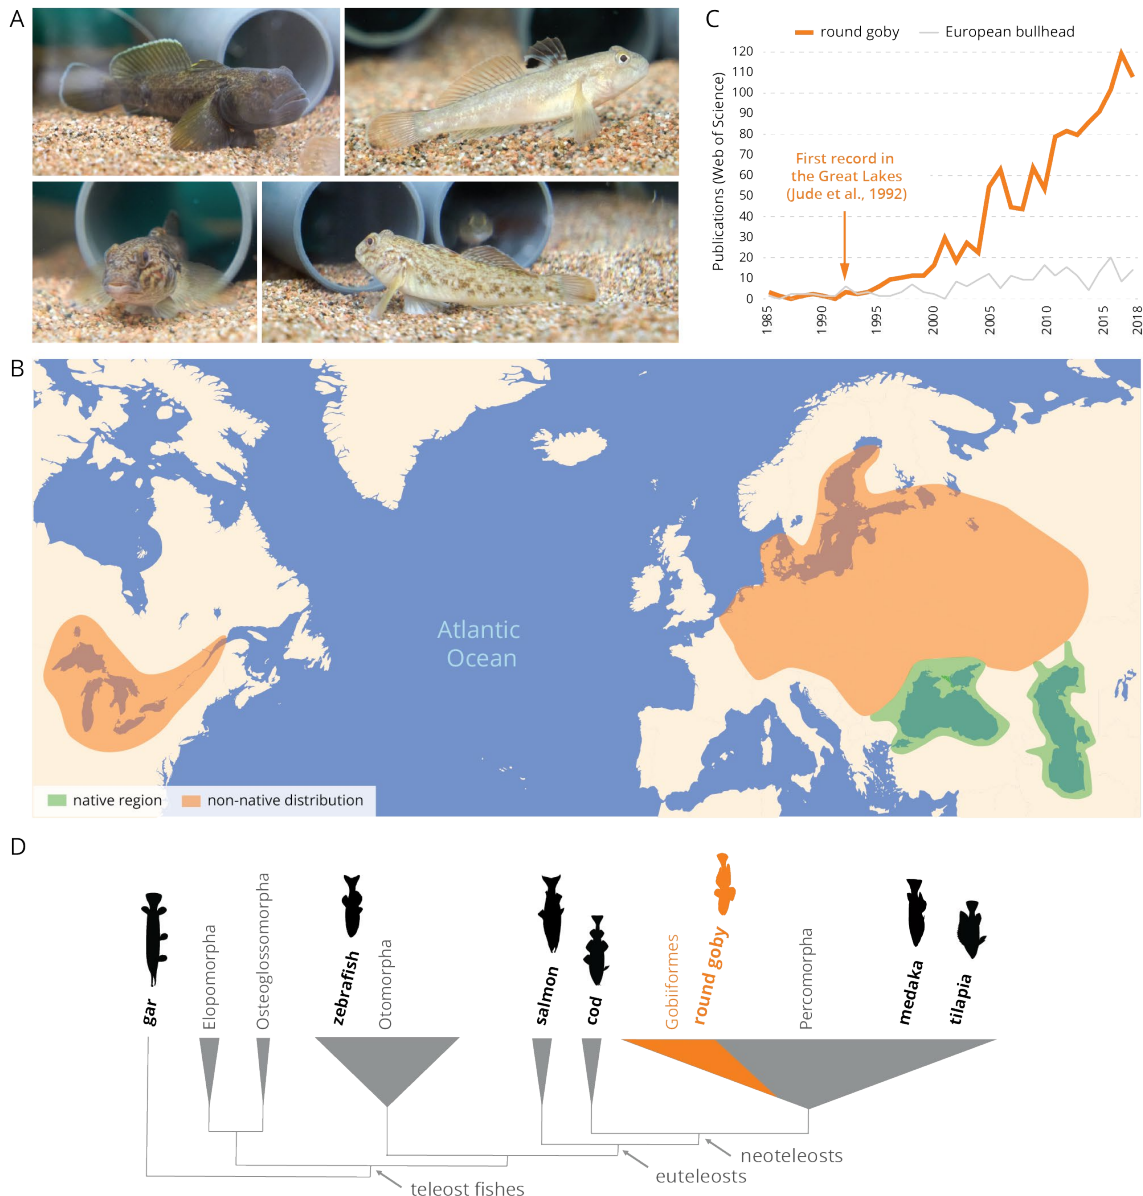

88

89 **Figure 1**

90 **The round goby, a benthic invasive fish species.** **A** Wild-caught round goby in aquaria. Individuals  
 91 are usually brightly colored or spotted with a characteristic black dot on the first dorsal fin. During the  
 92 reproductive season, territorial males develop a black body color (first panel). **B** The growing scientific  
 93 relevance of the species is reflected by records in Web of Science (orange) when compared to a non-  
 94 invasive fish with similar ecology (European bullhead, *Cottus gobio*; grey). **C** Current distribution of  
 95 round goby. The round goby has spread from its native region (green) to many European rivers and  
 96 lakes, the Baltic Sea, the Great Lakes and their tributaries (orange). **D** Phylogenetic position of the  
 97 round goby among fishes.

98

99 The survival of an individual in a novel environment depends on how well it can perceive, react to, and  
100 accommodate to its new surroundings. In this study, we therefore explore a high quality and  
101 contiguous genome assembly of the round goby for genes related to three categories: environmental  
102 perception, reaction to environmental conditions, and long-term accommodation to novel  
103 environments. We focus on gene families that have been hypothesized to play a role in the  
104 colonization of novel environments and on gene families that may relate to round goby invasion  
105 ecology.

106

107 For environmental perception, we investigated genes responsible for sensory perception in fishes. We  
108 specifically focused on the opsin genes for visual perception, as well as on the olfactory receptors for  
109 odor perception. Vision in fishes is often specifically adapted to environmental conditions, such as  
110 darkness in deep water (Musilova *et al.* 2019), modified color spectrum in turbid water (Seehausen *et al.*  
111 1997; Seehausen *et al.* 2008), habitat color (Barth *et al.* 2001), or specific light regimes or light  
112 compositions (Hornsby *et al.* 2013; You *et al.* 2014; Busserolles *et al.* 2017). The overall spectral  
113 sensitivity range of teleost fishes exceeds the human visual range and, in many cases, includes the  
114 UV (Barth *et al.* 2001) and far-red (Kenaley *et al.* 2014) spectrum. Similarly, olfaction is an essential  
115 chemoreception sense for fish, allowing for fast responses to predators and alarm cues as well as for  
116 intra-species communication. Pheromones have play an important role in the round goby (Corkum *et al.*  
117 2006; Farwell *et al.* 2017; Tierney *et al.* 2012), and males attract females into their nests by  
118 releasing them (Laframboise *et al.* 2011). A particularly specialized sense of smell therefore may  
119 provide an advantage during initial population establishment in novel environments.

120

121 We further investigated genes that may mediate responses to novel environments, namely genes  
122 involved in detoxification, ion transport and the immune system. The round goby occurs even in  
123 chemically contaminated harbors (Marentette *et al.* 2010; Marentette & Balshine 2012; McCallum *et al.*  
124 2014) and appears to tolerate xenobiotic compounds well. This suggests that the round goby may be  
125 particularly well equipped to degrade and eliminate chemical pollutants. We therefore analyze the  
126 cytochrome P450 gene superfamily, which is a particularly important and conserved part of the  
127 xenobiotic response (Goldstone *et al.* 2006). The round goby also tolerates a wide range of salinities  
128 (0 to 25 PSU / ‰) and temperatures (0°C-30°C) and occurs at latitudes ranging from <40° N in the  
129 Ponto-Caspian region to >60° N in the Baltic Sea. Most fishes tolerate only a narrow range of salinities

130 (Whitfield, 2015); the round goby however belongs to a specialized group, the euryhaline fish species,  
131 which thrive in fresh and brackish environments and includes estuarine species and migratory species  
132 such as salmon. We study the genetic basis of osmoregulation and osmolyte production in round goby  
133 to gain insights into the evolution of salinity and cold tolerance, and to possibly predict future range  
134 expansions. Invasive species encounter an array of previously unknown pathogens when they  
135 colonize a habitat, and invasion success may be related to a species' ability to tackle novel immune  
136 challenges (Lee and Klasing, 2004). Intriguingly, the round goby displays a low parasite load at the  
137 invasion front (David *et al.* 2018). We therefore characterize key factors of the innate and the adaptive  
138 immune system.

139

140 We also investigated conserved gene regulators because such genes might be involved in long-term  
141 adaptation to a novel environment. Mechanisms such as DNA methylation and histone modifications  
142 promote long- and short-term gene expression regulation and therefore mediate adaptations to altered  
143 conditions at the cellular level (Jaenisch and Bird, 2003), but also regulate genome-scale evolutionary  
144 processes such as the distribution of meiotic recombination events (Zamudio *et al.* 2015) or  
145 transposon activity (Choi *et al.* 2019), and provide stochastic variability as basis for selection (Feinberg  
146 and Irizarry, 2010). Epigenetic variants have been proposed to cause fitness-relevant differences in  
147 gene expression and phenotype (Herman and Sultan, 2016; Cortijo *et al.* 2014). The ecological  
148 flexibility of the round goby has been linked to enhanced gene expression plasticity in response to  
149 environmental stimuli (Wellband and Heath, 2017) and to their ability to pass information on water  
150 temperature to their offspring through maternal RNA (Adrian-Kalchhauser *et al.* 2018). To understand  
151 the features of core epigenetic regulators in the round goby, we focused on two widely conserved and  
152 well characterized parts of the epigenetic machinery: the histone-methylating PRC2 complex and the  
153 DNA methylases. Both mechanisms are thought to restrict developmental plasticity, downregulate  
154 gene expression (at least in mammals), and have been linked to plastic responses, behavioral  
155 changes, and environmental memory (Somerville *et al.* 2019; Grimm *et al.* 2019; Weyrich *et al.* 2016;  
156 Margueron and Reinberg, 2011; Gibbs *et al.* 2018).

157

158 Finally, we take advantage of the high genome contiguity to investigate sex determination using RAD  
159 sequencing data. Fish display a wide variety of sex determination mechanisms, ranging from sex

160 chromosomes to multilocus genetic sex determination to environmental sex determination (Martinez *et*  
161 *al.* 2014), and sex determination in the round goby has not previously been investigated.

162

## 163 **Results**

164

### 165 **1. The round goby genome**

166

167 The round goby genome assembly ("RGoby\_Basel\_V2", BioProject accession PRJNA549924,  
168 BioSample SAMN12099445, GenBank genome accession VHKM00000000, release date July 22  
169 2019) consists of 1364 contigs with a total length of 1.00 Gb (1'003'738'563 bp), which is within the  
170 expected size range (Hardie and Hebert, 2003, 2004; Gregory, 2019). It is assembled to high  
171 contiguity (NG50 at 1'660'458 bp and N50 at 2'817'412 bp). GC content is 41.60%. An automated  
172 Maker gene annotation predicts a total of 38,773 genes and 39,166 proteins, of which 30,698 are  
173 longer than 100 amino acids (**Table 1**; annotation track available as **Supplemental\_Material\_S1**).

174 The genome does not appear to contain a sex chromosome or a large sex determining region, since a  
175 RAD-tag dataset from 40 females and 40 males with an estimated resolution of 25,000 – 45,000 bp  
176 does not contain any sex-specific loci.

177

178 Approximately 47% of the genome assembly is masked as various types of repetitive sequences by  
179 RepeatMasker in the Maker annotation pipeline. The genome consists of approximately 9% predicted  
180 interspersed repeats (**Supplemental\_Table\_S1**), which is much lower than for zebrafish (*Danio rerio*,  
181 total genome size 1427.3Mb, 46% predicted as interspersed repeats) but higher than for the more  
182 closely related three-spined stickleback (*Gasterosteus aculeatus*, total genome size 446.6Mb, 3.2%  
183 predicted as interspersed repeats). Among interspersed repeats, the long terminal repeat (LTR)  
184 retrotransposon family is the most common in many species including fish (Repbase,  
185 <https://www.girinst.org/repbase/>). RepeatMasker identifies 0.9% LTR retrotransposons in the round  
186 goby genome, but separately run *de novo* predictions with LTRfinder and LTRharvest  
187 (**Supplemental\_Table\_S1**) indicate an underestimation of LTR retrotransposons and interspersed  
188 repeats by this approach. The latter approaches estimate that the proportion of LTR retrotransposons  
189 in the round goby genome is 11.2% (3.8% LTRs with target-site-repeats; LTRfinder) or 4.9%  
190 (LTRharvest), respectively.



191

192 In addition to the genome sequence, we provide raw short read sequencing data from various  
 193 published and ongoing projects. They include RNA sequencing data from early cleavage embryos  
 194 (Adrian-Kalchhauser *et al.* 2018), DNA methylation capture data from adult male brains (Somerville *et*  
 195 *al.* 2019), as well as RAD tags from two local Swiss populations and ATAC seq reads from brain and  
 196 liver (unpublished; **Table 1**).

197

198 **Table 1. Round goby genome assembly and annotation statistics.**

|                                   |                                                                                                                                                            |
|-----------------------------------|------------------------------------------------------------------------------------------------------------------------------------------------------------|
| <b>Assembly</b>                   |                                                                                                                                                            |
| Number of contigs                 | 1364                                                                                                                                                       |
| Total genome length (bp)          | 1,003,738,563                                                                                                                                              |
| Longest contig (bp)               | 19,396,355                                                                                                                                                 |
| Smallest contig (bp)              | 21,178                                                                                                                                                     |
| N50 contig length (bp)            | 2,817,412                                                                                                                                                  |
| <b>Annotation</b>                 |                                                                                                                                                            |
| Number of genes                   | 38,773                                                                                                                                                     |
| Genomic repeat content (%)        | 47                                                                                                                                                         |
| G + C (%)                         | 41.60                                                                                                                                                      |
| LTR retrotransposons (%)          | 4.9 - 11.2                                                                                                                                                 |
| <b>Accession</b>                  | NCBI BioProject PRJNA549924<br>Accession VHKM00000000                                                                                                      |
| <b>Additional sequencing data</b> |                                                                                                                                                            |
| RNA (Adrian-Kalchhauser 2018)     | Embryonic transcriptome (1-32 cell stages) from 16 clutches<br>NCBI BioProject PRJNA547711<br>NCBI SRA SRR9317352 - SRR9317366                             |
| DNAme (Somerville 2019)           | Brain DNA methylation data from 15 males<br>NCBI BioProject PRJNA515617<br>NCBI SRA SRR8450505 - SRR8450528                                                |
| RADseq (unpublished)              | RAD Seq data from 120 individuals<br>NCBI BioProject PRJNA547536<br>NCBI SRA SRR9214152 - SRR9214154                                                       |
| ATACseq (unpublished)             | ATAC Seq data of liver and brain from 50 individuals<br>NCBI BioProject PRJNA551348<br>NCBI SRA <i>[upload in process, will be provided during review]</i> |

199

## 200 **2. Sensory perception genes: Vision**

201

202 Vertebrates perceive color with cone cells expressing one of four types of opsin proteins (usually  
 203 sensitive to the red, green, blue, and ultraviolet part of the spectrum) and dim light with rod cells  
 204 expressing the rod opsin. The UV and blue light is detected by the short-wavelength sensitive SWS1  
 205 and SWS2 opsins, the green part of the spectrum is perceived mostly by the rhodopsin-like RH2



206 opsins, and the red color by the long-wavelength sensitive LWS opsins. Rod cells are active in the  
207 dim-light conditions and contain the rod opsin RH1 (Bowmaker and Hunt, 2006). Gene duplications  
208 and losses of the opsin genes during fish evolution correlate to certain extent with adaptations to  
209 specific environments (Cortesi *et al.* 2015; Musilova *et al.* 2019).

210

211 We identified two cone opsin gene duplications in the round goby genome. Firstly, the genome  
212 features a recent duplication of the green-sensitive RH2 gene. RH2 duplications are a common  
213 phenomenon in fish (**Figure 2**). Secondly, the genome features an ancient duplication of the long-  
214 wave red-sensitive LWS gene. The event can be traced most likely to the ancestor of all teleosts, or  
215 possibly even to the ancestor of Neopterygii (**Figure 2**; see **Supplemental\_Fig\_S1** for full tree). As  
216 expected, the round goby genome further contains one dim-light rod opsin (RH1) gene, two blue-  
217 sensitive SWS2 genes (Cortesi *et al.* 2015), and as previously reported for gobies, lacks the UV/violet-  
218 sensitive SWS1 gene (Cortesi *et al.* 2015; You *et al.* 2014; Musilova *et al.* 2019).

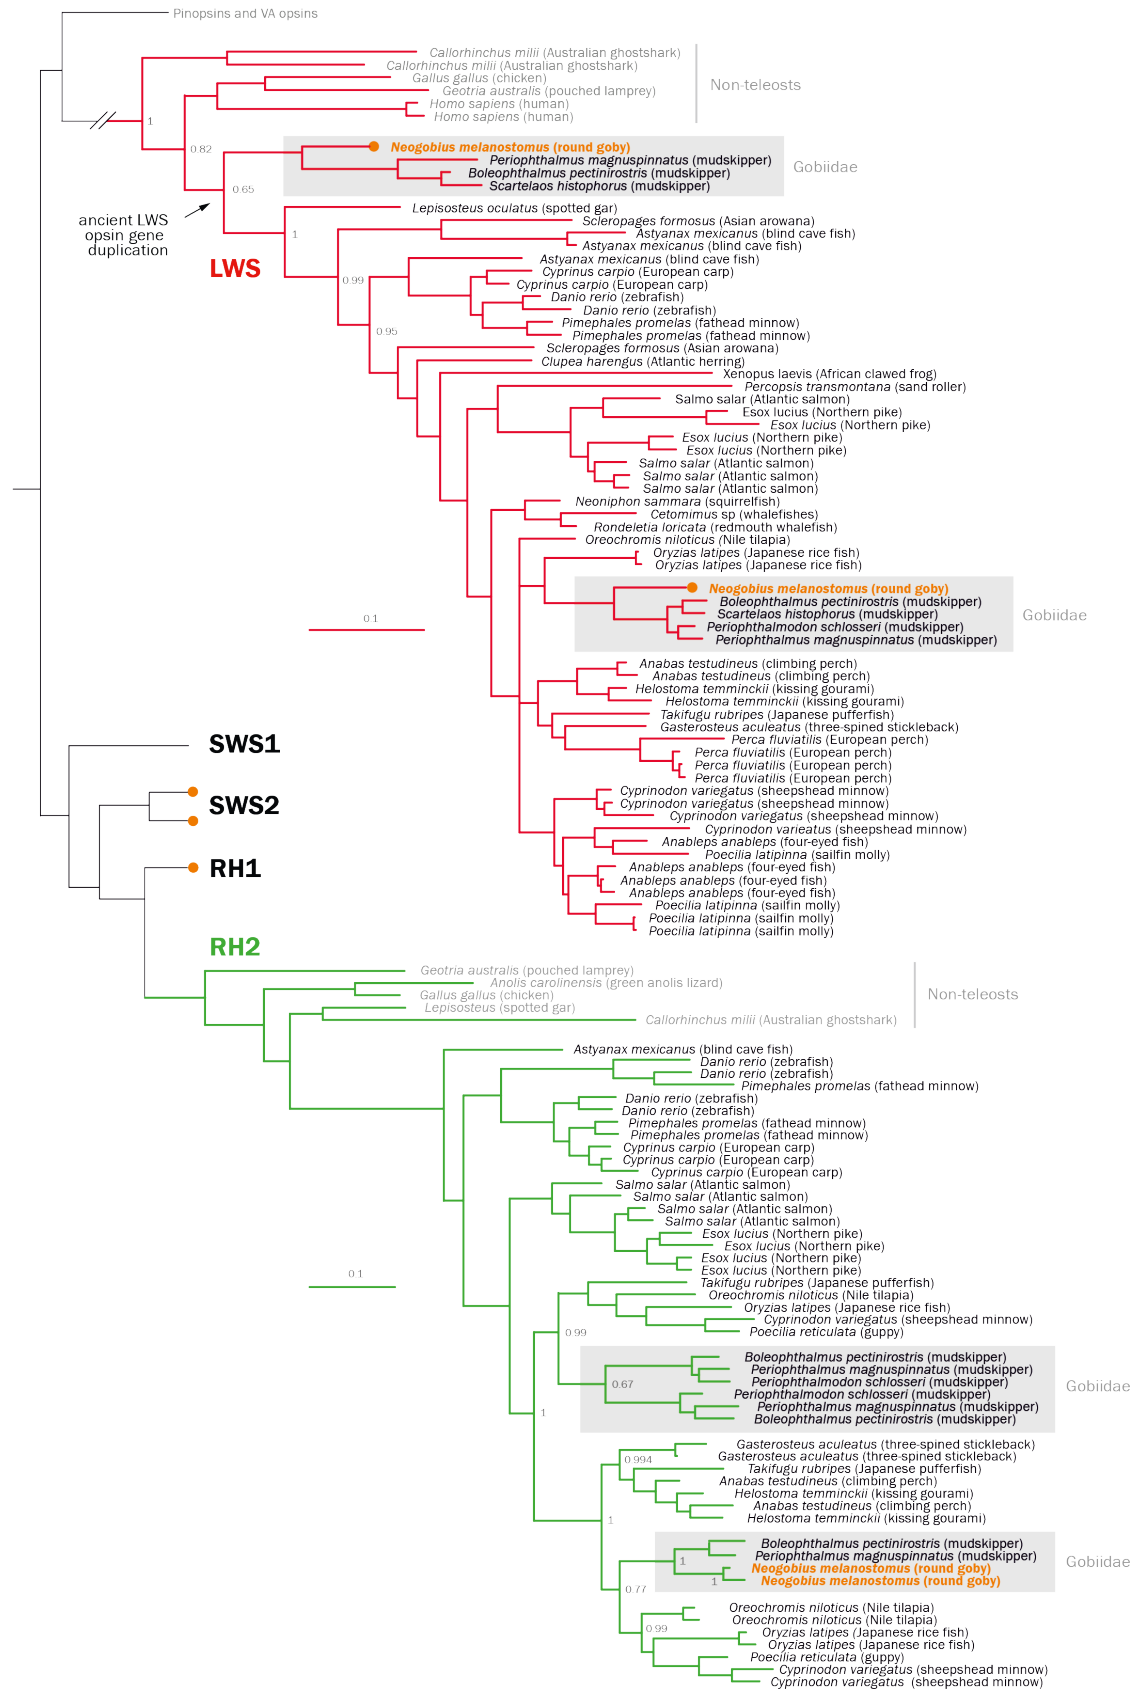

219 **Figure 2**

220 **Phylogenetic tree of vertebrate opsin gene sequences. Maximum-likelihood phylogenetic tree**

221 **based on the cone and rod visual opsins and using VA opsins and pinopsins as outgroup. The round**

222 **goby genome contains two LWS gene copies, which seem to be the results of an ancient gene**

223 duplication event, and two more recently duplicated RH2 gene copies. Round goby is indicated in  
224 orange. Red opsin branches are indicated in red. Green opsin branches are indicated in green. Non-  
225 teleost species and the outgroup (VA opsins and pinopsins) are indicated in grey. Grey boxes highlight  
226 Gobiidae.

227

228 The proposed ancestral position of the red opsin gene duplication is supported by three lines of  
229 evidence. First, the monophyly of all other teleost + gar LWS genes is strongly supported by the  
230 Bayesian analysis (Bayesian posterior probability value = 1). Second, the distant phylogenetic position  
231 is supported by trees based on individual exons, which indicate a low probability of a compromised  
232 phylogenetic signal, e.g. due to the partial gene conversion. Three of four exons cluster at the same  
233 position as the whole gene, while the fourth exon (exon 4) cluster with the genes resulting from a more  
234 recent teleost-specific LWS duplication specific to *Astyanax* and *Scleropages* (Liu *et al.* 2019;  
235 **Supplemental\_Fig\_S2**). Third, the choice of outgroup (parietopsin or pinopsin) does not affect the  
236 position of the LWS2 gene. Together, these analyses suggest either (1) the presence of an ancient  
237 gene duplication event of the LWS gene in the ancestor of teleost and holostean fishes (i.e.  
238 *Neopterygii*) which was retained only in the goby family, or (2) a teleost-specific event, possibly  
239 identical to that reported for characins and bony tongues (Liu *et al.* 2019), with a subsequent  
240 concerted goby-specific sequence diversification in exons 2, 3 and 5.

241

242 The spectral sensitivity of photopigments, i.e. their excitation wavelength can be modified by  
243 substitutions in certain key amino acids (Yokoyama, 2008). We find that round goby LWS1 and LWS2  
244 differ in the key spectral tuning site at amino acid 277 (position 261 of bovine rhodopsin, **Table 2**)  
245 suggesting a sensitivity shift of 10 nm.

246

247 To find a possible link to the ecological significance of the red opsin duplication, we checked for the  
248 presence of red skin fluorescence in the round goby. Interestingly, round goby individuals of both  
249 sexes and of all sizes (n=10) feature weakly red fluorescent crescents above the eyes (**Figure 3**).  
250 Whether such pattern has any relevance for the putatively enhanced vision in the red spectrum  
251 remains elusive.

252

253

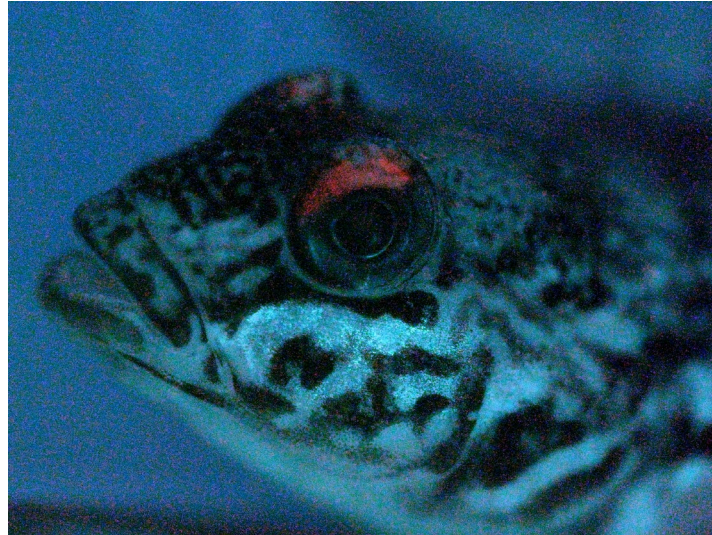

254 **Figure 3**

255 **Red fluorescence in the round goby.** Round gobies exhibit red fluorescence above the eyes when  
 256 exposed to green light.

257

258 **Table 2. Amino acid analysis of key tuning sites in Gobiidae red opsins proteins.**

| species                              | ecology                               | gene                                     | key tuning amino acid site in round goby |     |     |     |     | max. spectral sensitivity (wavelength) | reference       |
|--------------------------------------|---------------------------------------|------------------------------------------|------------------------------------------|-----|-----|-----|-----|----------------------------------------|-----------------|
|                                      |                                       |                                          | 180                                      | 197 | 277 | 285 | 308 |                                        |                 |
|                                      |                                       | <i>bovine rhodopsin equivalent site:</i> | 164                                      | 181 | 261 | 269 | 292 |                                        |                 |
| <i>Boleophthalmus pectinirostris</i> | terrestrial mudskipper                | LWS1                                     | A                                        | H   | Y   | T   | A   | 553 nm                                 | You et al. 2014 |
|                                      |                                       | LWS2                                     | A                                        | H   | F   | A   | A   | 531 nm                                 |                 |
| <i>Periophthalmus magnuspinnatus</i> | terrestrial mudskipper                | LWS1                                     | S                                        | H   | Y   | T   | A   | 560 nm                                 |                 |
|                                      |                                       | LWS2                                     | A                                        | H   | F   | T   | A   | 546 nm                                 |                 |
| <i>Neogobius melanostomus</i>        | freshwater temperate rivers and lakes | LWS1                                     | S                                        | H   | Y   | T   | A   | 560 nm                                 | this study      |
|                                      |                                       | LWS2                                     | S                                        | H   | F   | T   | A   | 550 nm*                                | this study      |

\* = predicted by the key tuning sites, and Y261F shift of 10 nm; Yokoyama, 2008.

259

### 260 3. Sensory perception genes: Olfaction

261

262 Olfactory receptors (OR) in vertebrates are 7-transmembrane-domain G-protein coupled  
 263 transmembrane proteins. They are expressed in neurons embedded in membranes of the olfactory  
 264 lamellae. Mammals usually have several hundred OR genes that cluster in two major types (~400 in

265 human, and ~1000 genes in mouse; Niimura, 2012). Teleost fishes possess fewer OR genes but  
266 feature a higher diversity (5 kinds of type 2 ORs in teleosts as compared to 2 kinds of type 2 ORs in  
267 mammals; Niimura, 2009). The binding properties of individual ORs, especially in fishes, are virtually  
268 unexplored.

269

270 We identified 112 putative olfactory receptor genes in the round goby genome. To put this result into  
271 evolutionary context, all analyses were carried out in comparison with two Gobiidae species (blue-  
272 spotted mudskipper and giant mudskipper) and two percomorph species (three-spined stickleback,  
273 *Gasterosteus aculeatus* and Nile tilapia, *Oreochromis niloticus*; **Figure 4A**). The round goby presented  
274 similar number of ORs (112) to the giant mudskipper (106) and stickleback (115), notably less than the  
275 blue-spotted mudskipper (154) and near half the amount compared to Nile tilapia (214). We find that  
276 all ORs belong to one of two transmembrane domain subtypes according to the Pfam database (7tm4  
277 or 7tm1; **Figure 4B**; **Supplemental\_Fig\_S3**). This matches a previous large-scale phylogenetic  
278 analysis which identified two main types of olfactory receptor genes in vertebrates (Niimura, 2009).  
279 The functional differences between the domain subtypes are unclear, but their different consensus  
280 sequences may confer distinct biochemical properties.

281

282 Our analyses identify several cases of clade-specific gene expansions. Certain OR genes are  
283 expanded in parallel in several lineages (**Figure 4C**). Likely, those expansion events are the result of  
284 clade-restricted gene duplications, although a secondary role for gene conversion after species  
285 divergence cannot be ruled out. While the Nile tilapia features the greatest overall amount of  
286 expansions, the round goby presents the highest number of genes and expansions within the 7tm1  
287 subfamily, a trend that is consistent in the other Gobiidae species (**Figure 4D**).

288

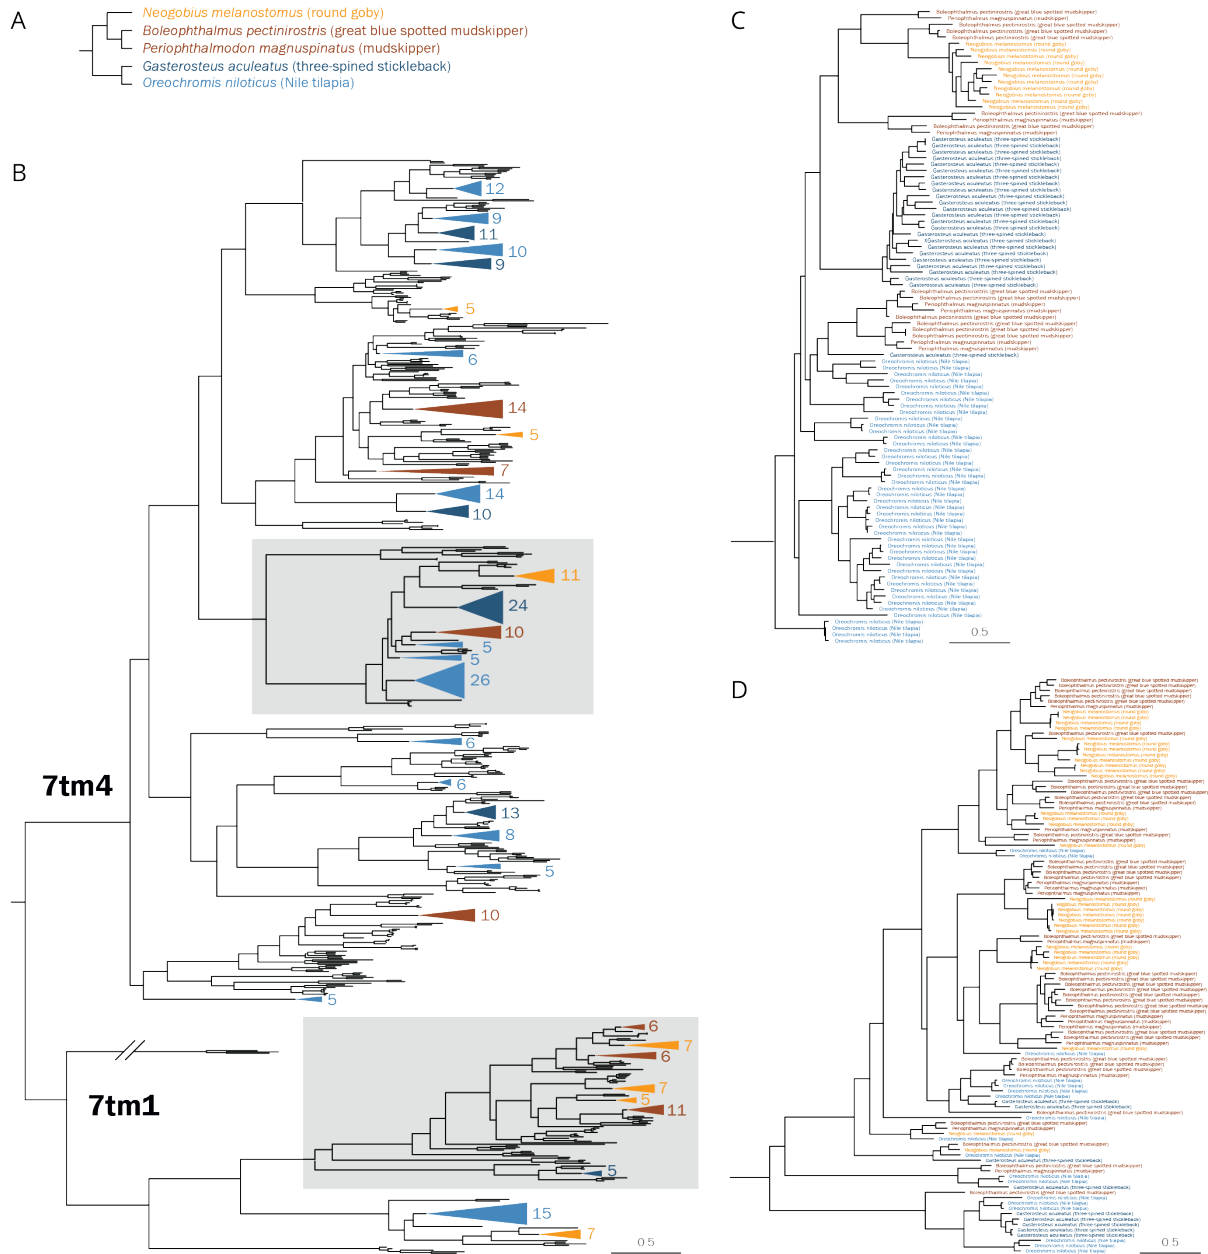

289

290 **Figure 4**

291 **Phylogenetic tree of percomorph olfactory receptor protein sequences. A** Phylogenetic  
 292 relationship among five analyzed percomorph species, i.e. three gobiids, one cichlid and one  
 293 stickleback. **B** Maximum-likelihood phylogenetic tree constructed with adrenergic receptors as  
 294 outgroup. Sequences were identified de novo except for Nile tilapia (blue). Branches magnified in  
 295 panels C and D are highlighted with grey boxes. **C** Branch of the 7tm4 family featuring large  
 296 independent expansions in all species analyzed. **D** Branch of the 7tm1 family featuring several  
 297 expansions in Gobiidae (red, orange) that are not paralleled in other percomorph species (blue).

298



#### 299 4. Response to the environment: Detoxification

300

301 The CYP gene superfamily is an essential part of the defense, a collection of genes that provide  
302 protection against harmful chemicals (Goldstone *et al.* 2006). Vertebrate genomes contain between  
303 50-100 CYP genes. The genomes of fugu and zebrafish, for example, encode 54 (Nelson, 2003) and  
304 94 (Goldstone *et al.* 2010) CYP genes respectively. Expansions of individual CYP families occur in  
305 both mammals and fish. For example, zebrafish have three times as many CYP2 family members (40)  
306 as most other vertebrate species (13-15), and similar expansions of CYP2 genes have been observed  
307 in mice and rats (Kirischian *et al.* 2011).

308

309 We find that the round goby genome contains few CYP genes. We identify 25 complete or partial CYP  
310 genes, as well as 21 gene fragments. Pseudogenes are common for CYP genes (Nelson, 2003;  
311 Goldstone *et al.* 2010; Dejong and Wilson, 2014), which is why strict annotation criteria are applied  
312 first before smaller fragments are considered. In total, the genome contains approximately 50 CYP  
313 genes (**Supplemental\_Table\_S2**).

314

315 When including gene fragments, all expected CYP families are present in the round goby, and the  
316 phylogenetic analyses show the expected relationships between gene families and between  
317 vertebrates (**Figure 5**). Fish and most vertebrates have CYP genes from 17 families (CYP 1-5, 7, 8,  
318 11, 17, 19, 20, 21, 24, 26, 27, 46 and 51; Nelson, 2003), while the CYP39 family occurs in humans  
319 and zebrafish, but not in fugu (Nelson, 2003; Goldstone *et al.* 2010). In the round goby, the complete  
320 or partial genes could be assigned to 9 CYP families (CYP 1- 4, 8, 19, 26, 27 and 51). The families  
321 CYP7, CYP11, CYP17 and CYP21 were present among the sequence fragments.

322

323 Contrary to expectations, the classical detoxification families CYP1-3 were not expanded (**Figure 5**).  
324 CYP1, 2, 3 and to a lesser extent CYP4 proteins are responsible for the oxidative metabolism of  
325 xenobiotic compounds (pollutants, drugs, etc.). In rodents and humans, the CYP1 family metabolizes  
326 planar cyclic aromatic hydrocarbon compounds (reviewed in Luch and Baird), the CYP2 family  
327 metabolizes structurally diverse drugs, steroids and carcinogens, the CYP4 family catalyzes the  $\omega$ -  
328 hydroxylation of the terminal carbon of fatty acids and xenobiotics, and CYP3 genes metabolize a  
329 range of structurally different compounds in the liver and intestines. Over 50% of all pharmaceutical



330 compounds are metabolized by CYP3A genes in human. The goby genome contains three or four  
331 CYP1 genes: one CYP1B gene, two CYP1C genes, and one CYP1A fragment. The latter lacks two  
332 main characteristics (I- and K-helix) and could therefore be a pseudogene. As expected for a  
333 vertebrate (Kirischian *et al.* 2011), the genome contains many CYP2 genes. The most important fish  
334 CYP2 families were represented, including CYP2J, CYP2N, CYP2Y and CYP2AD. Finally, the round  
335 goby had a single CYP3A gene and a potential CYP3A fragment. This is somewhat unusual because  
336 fish often feature species-specific CYP3 subfamilies in addition to CYP3A. For example, medaka also  
337 contains CYP3B genes, zebrafish CYP3C genes, and Acanthopterygii fish CYP3D genes (Yan and  
338 Cai, 2010).

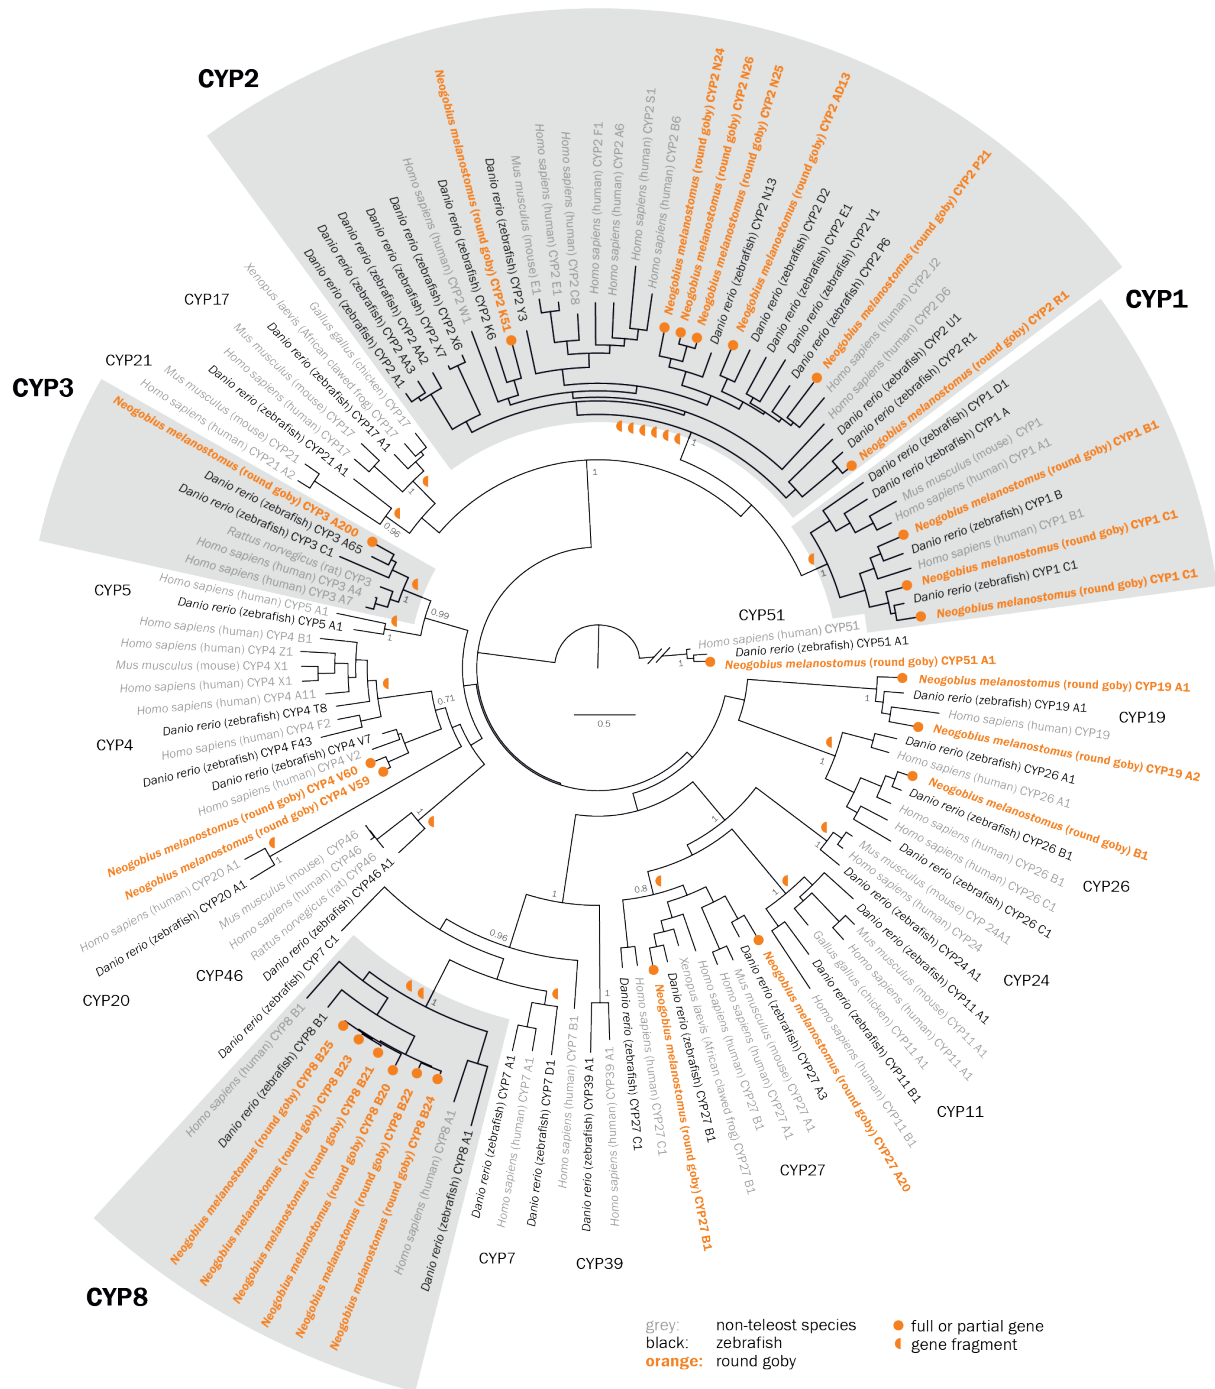

339

340 **Figure 5.**

341 **Phylogenetic tree of vertebrate CYP protein sequences.** Maximum likelihood phylogenetic tree

342 with 100 bootstraps, rooted with the CYP51 family. Detoxification genes CYP1-3 do not feature

343 unusual expansions, while the CYP8 family is expanded to six members (grey boxes). Non-fish

344 vertebrates are printed in grey. Fragments too short for tree building but attributable to a certain family

345 are indicated by orange half circles next to the root of the respective family.

346

347 We find that the round goby genome contains six CYP8 genes, which is more than expected based on  
348 observations from the other gobies. The closely related large blue-spotted mudskipper has only two  
349 CYP8 genes (XM\_020924471 and XM\_020919000.1; about 73-85% identity); no sequences were  
350 found in other mudskipper species. Accordingly, we assume that the CYP8B genes have undergone  
351 species-specific tandem duplications in the round goby, as is also known for the subfamilies CYP2AA,  
352 CYP2X and CYP2K in zebrafish (Kirischian *et al.* 2011). Five round goby CYP8 genes locate to the  
353 same contig with high sequence similarity (~90%), which is similar to zebrafish CYP8B1-3 that also  
354 colocalize on the same chromosome (Goldstone *et al.* 2010). Misidentification of closely related CYP7,  
355 CYP8, and CYP39 genes as CYP8 is unlikely given the colocalization and high sequence similarity.  
356 The function of the expansion is presently unclear, although expression patterns in zebrafish suggest  
357 a role in the early embryo (Goldstone *et al.* 2010). In humans, CYP8 genes act as prostacyclin  
358 synthases that mediate steroid metabolic pathways in bile acid production or prostaglandin synthesis  
359 (Yokoyama *et al.* 1996). Based on structural similarities with yeast proteins, CYP8 genes might also  
360 have E3 ubiquitin ligase activity. The almost identical crystal structures of zebrafish and human  
361 CYP8A1 suggest similar functions in fish and mammals (Li *et al.* 2008).

362

## 363 **5. Response to the environment: Osmoregulation**

364

365 Osmotic homeostasis depends on passive ion and water uptake through cell membranes and the  
366 intercellular space, on the active uptake or excretion of ions, and on the production and accumulation  
367 of osmolytes. To understand the ability of round goby to tolerate a wide range of salinities, we  
368 therefore compared the round goby repertoire of osmoregulatory genes to those of a stenohaline  
369 freshwater species (zebrafish) and of euryhaline species (Nile tilapia, blue-spotted mudskipper and  
370 three-spine stickleback).

371

372 Passive ion and water transport across membranes (transcellular permeability) depends on the  
373 superfamily of aquaporin proteins. Aquaporins transport water (classical aquaporins), water and  
374 glycerol (aquaglyceroporins), ammonia (aquaammoniaporins), or additional undescribed molecules  
375 (unorthodox aquaporins; **Figure 6**). Primary sequences are only moderately conserved between the  
376 classes (approximately 30% identity), but all aquaporins share six membrane-spanning segments and  
377 five connecting loops. We find 15 aquaporin genes in the round goby, which compares to the number

378 in human (n=13) or zebrafish (n=20) and is lower than in the euryhaline Atlantic salmon (n=42; Finn  
 379 and Cerdà, 2011; Finn *et al.* 2014). With 5 classical water aquaporins, 6 aquaglyceroporins, 2  
 380 aquaammonioporins, and 2 unorthodox aquaporins, the round goby features the same types of  
 381 aquaporins as freshwater stenohaline fish (e.g., zebrafish) and highly euryhaline fish (e.g., tilapia;  
 382 **Figure 6**).

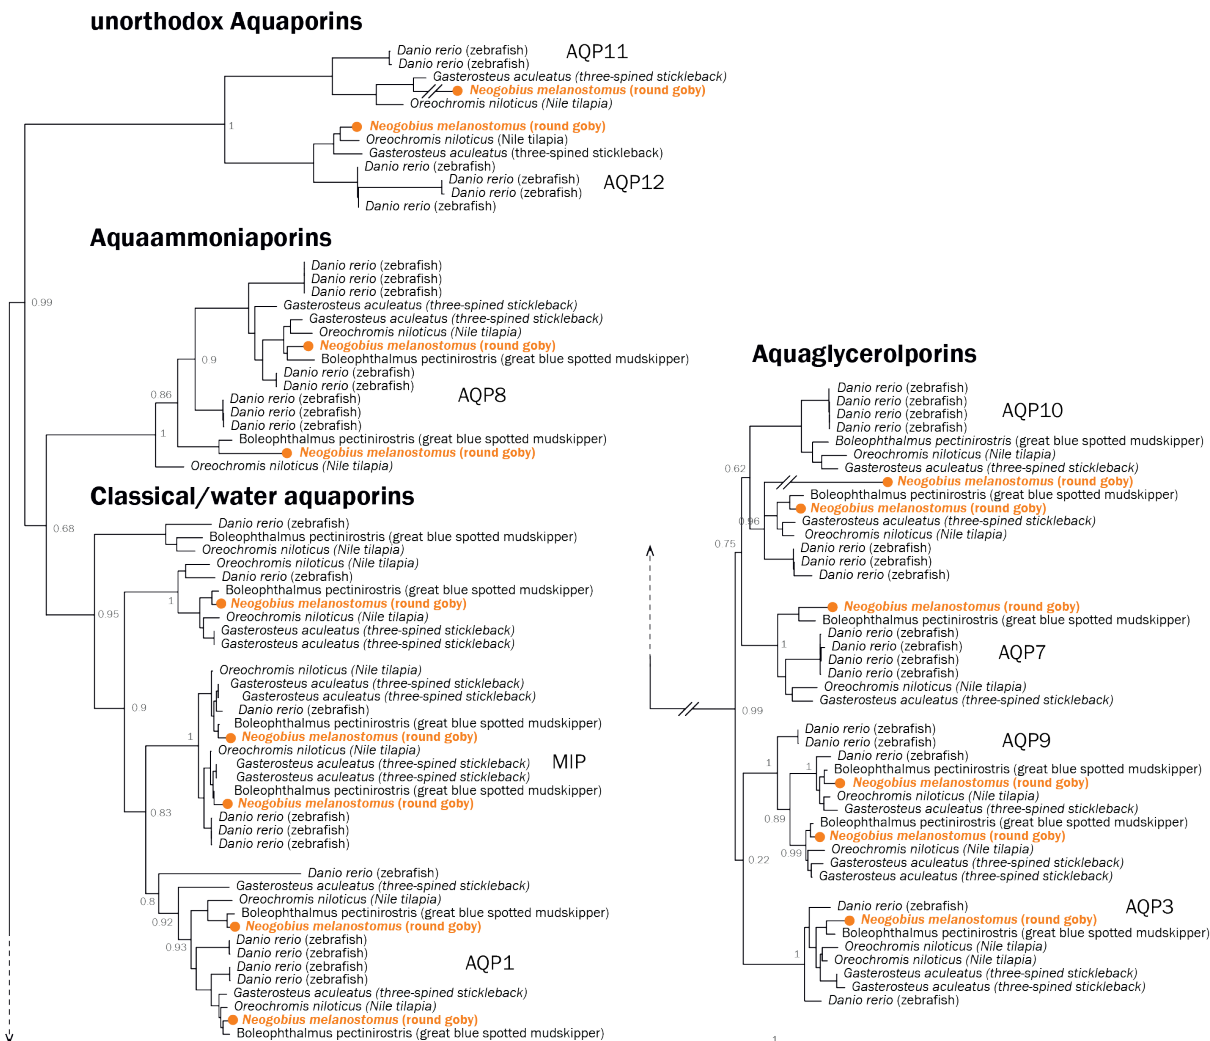

384  
 385 **Figure 6**  
 386 **Phylogenetic tree of fish aquaporin proteins.** Maximum-likelihood tree with 100 bootstraps of round  
 387 goby (*Neogobius melanostomus*, orange) in relation to cyprinid zebrafish (*Danio rerio*) and  
 388 percomorph three spine stickleback (*Gasterosteus aculeatus*), Nile tilapia (*Oreochromis niloticus*), and  
 389 great blue-spotted mudskipper (*Boleophthalmus pectinirostris*). Zebrafish was used as outgroup in  
 390 each aquaporin subfamily. The main classes of aquaporins are labeled with human genes names.

392 Ion and water flow between cells in epithelia (paracellular permeability) is regulated by tight junctions,  
393 of which claudin and occludin proteins are the most important components. Mammalian genomes  
394 contain ~ 20 claudin genes, invertebrates such as *Caenorhabditis elegans* or *Drosophila melanogaster*  
395 contain 4-5 genes, and fish often feature large expansions. For example, the fugu genome contains 56  
396 claudins, of which some occur in clusters of > 10 genes (Loh *et al.* 2004). The round goby genome  
397 features 40 claudin paralogues, which is in line with numbers known from other fish. All human claudin  
398 genes were represented as homologues (**Supplemental\_Fig\_S4**), and the round goby genome  
399 contains one occludin gene in each of the two known subclades of the protein family  
400 (**Supplemental\_Fig\_S5**).

401

402 In the kidney, intestine and gills, fish use active ion transport (mostly sodium transporters) to maintain  
403 osmotic balance. Mechanisms mediating sodium uptake include electroneutral Na<sup>+</sup>/H<sup>+</sup> exchange via  
404 the NHE3b protein, Na<sup>+</sup>/Cl<sup>-</sup> cotransport via the NCC protein, and coupling of Na<sup>+</sup> absorption with H<sup>+</sup>  
405 secretion by a V-type H<sup>+</sup>-ATPase (Hwang and Chou, 2013). We find 12 Na<sup>+</sup>/H<sup>+</sup> exchanger genes, 5  
406 Na<sup>+</sup>-K<sup>+</sup>-ATPase catalytic alpha subunits and 6 Na<sup>+</sup>-K<sup>+</sup>-ATPase regulatory beta subunits in the round  
407 goby genome. The round goby thus contains the same types of genes, but less copies, than either  
408 zebrafish or tilapia (**Supplemental\_Fig\_S6**). We find that round goby, and also mudskippers, feature  
409 an interesting distribution of Na<sup>+</sup>/Cl<sup>-</sup> co-transporters to subgroups; while most zebrafish and tilapia  
410 Na<sup>+</sup>/Cl<sup>-</sup> co-transporters belong to the NKCC1 subgroup, Gobiidae feature more genes in the NKCC2  
411 subgroup (**Figure 7**).

412

413

414

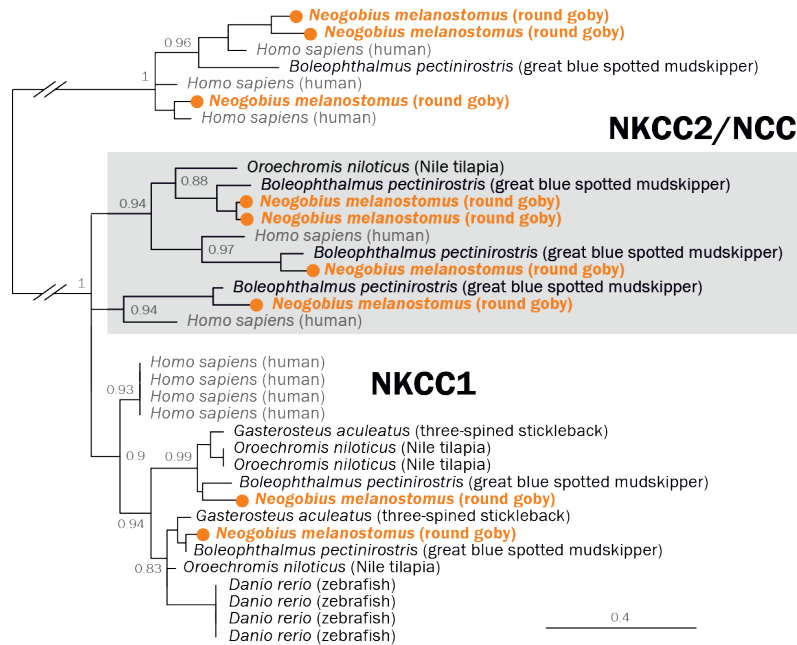

415

416 **Figure 7**

417 **Phylogenetic tree of human and fish sodium/potassium/chloride co-transporter proteins**

418 **(NKCC)**. Maximum likelihood tree with 100 bootstraps of round goby (*Neogobius melanostomus*,  
 419 orange), zebrafish (*Danio rerio*), three spine stickleback (*Gasterosteus aculeatus*), nile tilapia  
 420 (*Oreochromis niloticus*), great blue-spotted mudskipper (*Boleophthalmus pectinirostris*) and as  
 421 contrast humans (*Homo sapiens*, grey). Potassium/chloride co-transporters (KCC) are used as  
 422 outgroup.

423

424 Finally, fish produce osmolytes to actively take up and retain water. In particular, the cyclic polyol myo-  
 425 inositol is used by euryhaline teleosts to acclimate to high salinity. Two enzymes are required for its  
 426 production: myo-D inositol 3-phosphate synthase (MIPS) and inositol monophosphatase (IMPA). In  
 427 addition, some fish actively accumulate myo-inositol with a sodium/myo-inositol cotransporter (SMIT;  
 428 Ronkin *et al.* 2015; Rim *et al.* 1998). This transporter is of particular importance for marine fish  
 429 exposed to high salt concentrations (Wang and Kültz, 2017; Sacchi *et al.* 2014), while freshwater fish  
 430 lack a SMIT gene (e.g. the freshwater stenohaline zebrafish lacks the SMIT gene). The presence of  
 431 SMIT has therefore been proposed to be a critical prerequisite for high salinity tolerance in fish (Sacchi  
 432 *et al.* 2013). We find that the round goby genome contains MIPS and IMPA, and importantly, also a  
 433 SMIT gene (**Supplemental\_Fig\_S7**).

434

435 **6. Response to the environment: Immune System**

436

437 It has been speculated that invasion success may relate to the ability to fight novel immune challenges  
438 (Lee and Klasing, 2004). We therefore characterized key genes related to the immune system,  
439 focusing on genes that span both the innate and adaptive immune system such as pattern recognition  
440 receptors, selected cytokines and chemokines, antigen presentation, T-cell surface receptors and  
441 antibodies (**Supplemental\_Table\_S3; Supplemental\_Table\_S4**).

442

443 We find that the round goby genome features a classical adaptive immunity setup (**Table 3**).  
444 Vertebrate adaptive immunity is characterized by the Major Histocompatibility Complex (MHC) class I  
445 and MHC class II proteins and their regulators. MHCI presents antigens derived from a cell's  
446 intracellular environment, while MHCII presents antigens derived from material engulfed by  
447 macrophages, B-cells or dendritic cells (Flajnik, 2018). We find 26 full length MHCI sequences from  
448 the classic U-lineage and one sequence from the teleost-specific Z-lineage (Grimholt *et al.* 2015;  
449 **Supplemental\_Table\_S5**). MHCII is represented by 8 alpha (2 fragments) and 9 beta copies  
450 (**Supplemental\_Table\_S6**). The uneven numbers may be attributed to assembly issues, but also,  
451 additional small fragments were not further investigated (data not shown). We also identify the key  
452 MHC-supporting peptides Beta-2-Microglobulin, *CD74*, *TAP1/2* and *tapasin*. Beta-2-Microglobulin  
453 (*B2M*) is present in two copies, one of which contains several indels, a diverged region, and no stop  
454 codon and thus may be a pseudogene. The round goby has two copies of *TAP2*, which promotes the  
455 delivery of peptides to MHCI (annotated as *TAP2* and *TAP2T*; **Supplemental\_Table\_S4**;  
456 **Supplemental\_Fig\_S8**). Two *TAP2* genes have also been described in zebrafish, and our results thus  
457 suggest this is conserved feature among teleosts (McConnell *et al.* 2016). In addition, we identify the  
458 MHC transcriptional regulators *CIITA* and *NLRC5* (**Supplemental\_Table\_S3**). The presence of the  
459 thymus transcription factor *AIRE* and the T-cell receptors *CD4* and *CD8* confirms the presence of  
460 helper T cells and cytotoxic T cells in the round goby.

461

462



463 **Table 3.** Overview of manually annotated key adaptive immune genes

| Gene              | NEME annotation | Contig annotation | Start      | End        | Strand    |
|-------------------|-----------------|-------------------|------------|------------|-----------|
| <b>CIITA</b>      | NEME_493        | Contig_2585       | 3 985 719  | 3 993 128  | Antisense |
| <b>AICDA</b>      | NEME_58         | Contig_447        | 597 424    | 599 014    | sense     |
| <b>AIRE</b>       | NEME_9          | Contig_79         | 14 106 230 | 14 113 573 | antisense |
| <b>B2M</b>        | NEME_421        | Contig_2242       | 363 050    | 363 352    | antisense |
| <b>B2M_pseudo</b> | NEME_421        | Contig_2242       | 368 352    | 368 721    | antisense |
| <b>CD4</b>        | NEME_213        | Contig_1334       | 340 445    | 348 248    | sense     |
| <b>CD74</b>       | NEME_71         | Contig_593        | 791 743    | 796 652    | antisense |
| <b>CD8a</b>       | NEME_729        | Contig_3231       | 634 222    | 648 487    | antisense |
| <b>CD8b</b>       | NEME_729        | Contig_3231       | 656 030    | 660 462    | antisense |
| <b>RAG1</b>       | NEME_106        | Contig_787        | 4 690 414  | 4 695 142  | sense     |
| <b>RAG2</b>       | NEME_106        | Contig_787        | 4 699 042  | 4 700 651  | antisense |
| <b>TAP1</b>       | NEME_582        | Contig_2864       | 694 776    | 722 339    | sense     |
| <b>TAP2</b>       | NEME_387        | Contig_2107       | 2 987 106  | 2 993 287  | antisense |
| <b>TAP2T</b>      | NEME_299        | Contig_1786       | 3 697 645  | 3 704 089  | sense     |
| <b>Tapasin</b>    | NEME_387        | Contig_2107       | 3 111 989  | 3 119 308  | sense     |

464

465 Similarly, the humoral adaptive immune response (also termed the B-cell mediated immune response)  
466 is intact in the round goby. Humoral immunity in fish is characterized by three antibody isotypes  
467 consisting of immunoglobulin heavy chains delta (IgD), mu (IgM), and tau (IgT). We identify a contig-  
468 spanning immunoglobulin heavy chain locus (**Supplemental\_Fig\_S8**) containing 8 delta constant  
469 domains, and 4 constant mu domains, as well as genes responsible for heavy chain recombination  
470 and immunoglobulin hypermutation (*RAG1/2* and *AID(AICDA)*; **Table 3**; **Supplemental\_Table\_S3**).  
471 There is no evidence for the presence of immunoglobulin tau constant domains, which are commonly  
472 found in carps and salmonids (Mashoof and Criscitiello, 2016).

473

474 While round goby adaptive immunity conforms to vertebrate standards, its innate immune repertoire  
475 displays remarkable and unusual features. We find that all components of the inflammasome (a  
476 signaling pathway involved in inflammatory responses; **Figure 8**) are expanded. Inflammasome  
477 assembly is activated through pathogen pattern recognition receptors (Riera Romo *et al.* 2016), and  
478 ultimately triggers a local or systemic acute phase response by producing IL-1 family cytokines (Riera  
479 Romo *et al.* 2016; Guo *et al.* 2015) and/or promotes cell death via pyroptosis (Guo *et al.* 2015). In the  
480 round goby genome, components of the entire cascade (pattern recognition receptors, ASC adaptor  
481 proteins, IL-1, and acute phase proteins) are present in unexpectedly large numbers (**Figure 8**;

482 **Supplemental\_Table\_S8**). In the following, our findings are described step-by-step from the cell  
483 surface down to the acute phase response.

484

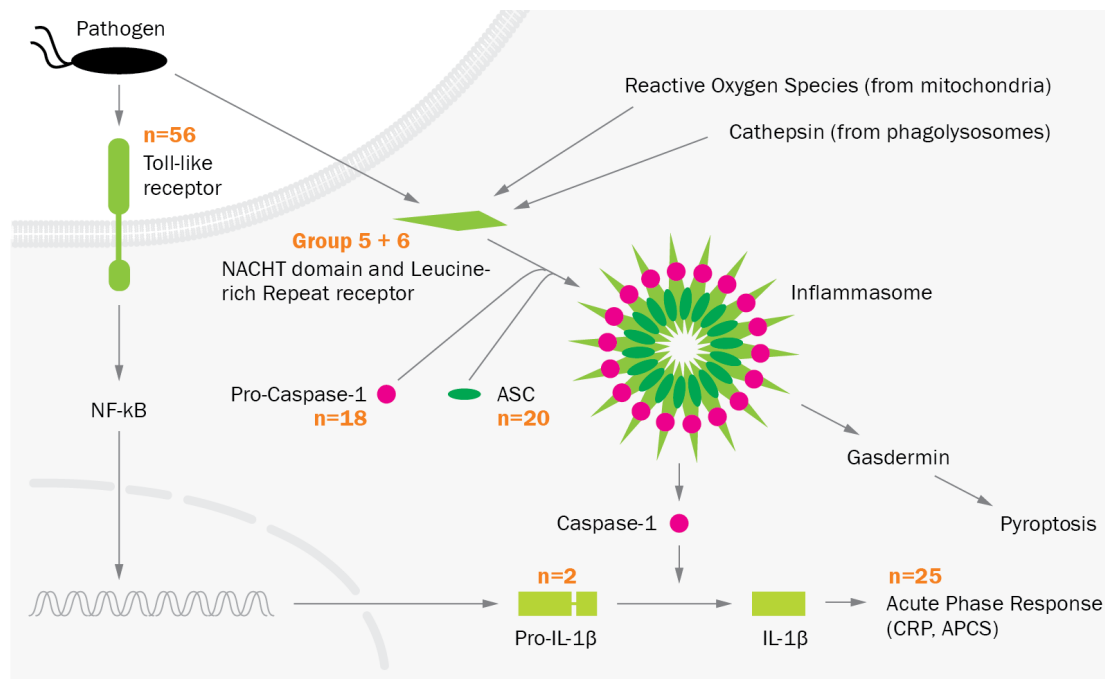

485

486 **Figure 8.**

487 **The inflammasome pathway.** Several components of the pathway are expanded in the round goby  
488 (gene numbers in round goby, or novel groups for NLRs, are indicated in orange). Pathogen-  
489 associated patterns are recognized by pattern recognition receptors such as Toll-like receptors at the  
490 cell surface, or NLRs in the cytoplasm. This interaction triggers the transcription of cytokine precursors  
491 via NF-kB, and the activation and assembly of inflammasome components (NLRs, Pro-Caspase-1, and  
492 ASC). Inflammasome-activated Caspase-1 then initiates the maturation of cytokines and an acute  
493 phase inflammatory response (CRP, APCS proteins), and / or pyroptosis through gasdermin.

494

495 Perhaps the best studied pattern recognition receptors are the Toll-like Receptors (TLRs), pathogen-  
496 recognizing molecules that are generally expressed either at the plasma membrane or on the  
497 endosomal membranes. Sixteen TLR types with slightly differing ligand binding activities are  
498 conserved across vertebrates, and most vertebrate genomes contain one to three copies of each type.  
499 As expected for a teleost, the round goby genome does not contain the LPS-detecting TLR4 genes.  
500 However, in total we find 56 TLRs, of which 40 appear to originate from an expansion of Toll-Like  
501 Receptor 23-like genes (**Figure 9**). Small expansions of specific *TLRs* are somewhat common in fish

502 (Solbakken *et al.* 2016), and indeed, we find minor *TLR22* and *TLR23* expansions to 6-13 copies in  
503 the genomes of other *Gobiidae*. However, the extent of the expansion of *TLR23* exceeds even what is  
504 observed for *TLR22* in the relatives of cod (*Gadiformes*, Solbakken *et al.* 2017). Phylogenetically, the  
505 identified *TLR23* sequences form three clades, of which two are specific to *Gobiidae*, while the third  
506 contains *TLR23* sequences from other teleosts as well (**Supplemental\_Fig\_10**). In terms of genomic  
507 location, round goby *TLRs* 22 and 23 were distributed across several contigs with some copies  
508 arranged in tandem, which suggests several independent duplication events.

509

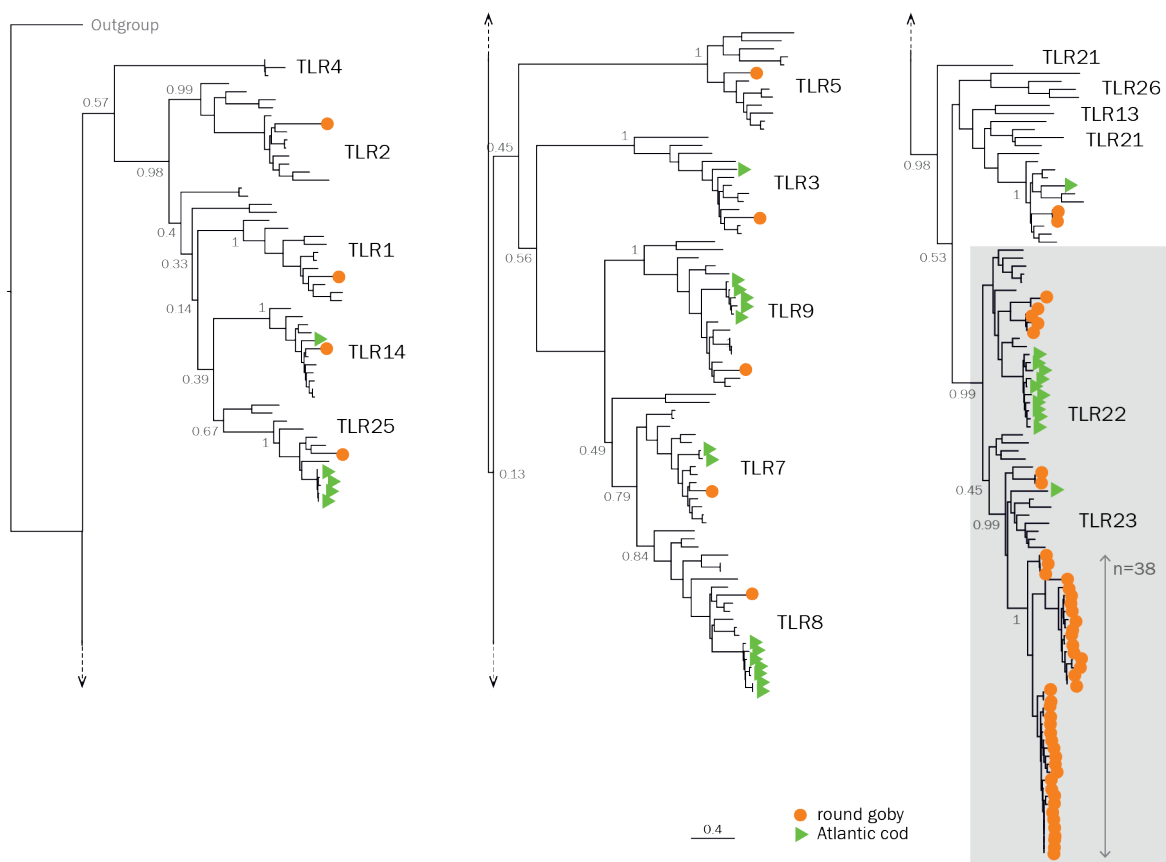

510 **Figure 9**

511 **Phylogenetic tree of teleost Toll Like Receptor protein sequences.** A maximum likelihood  
512 phylogenetic tree run with the JTT substitution model and 500 bootstrap replicates on the  
513 transmembrane, linker and TIR domain of all *TLRs* found in a selected set of teleosts in the Ensembl  
514 database, the Atlantic cod genome version 2, and all manually investigated *Gobiiformes*. A *TLR*  
515 sequence from the lancelet *Branchiostoma belcheri* was used as an outgroup and the root was placed  
516 upon its corresponding branch. Green triangles, Atlantic cod. Orange circles, round goby. Grey box,  
517 *TLR22* and *TLR23*.

518 For intracellular pathogen recognition receptors of the NACHT domain and Leucine-rich Repeat  
519 containing receptor (NLR) family, we identify two new, previously undescribed families (Group 5 and 6)  
520 present in the round goby and also in the mudskipper *B. pectinirostris* (Figure 10).  
521

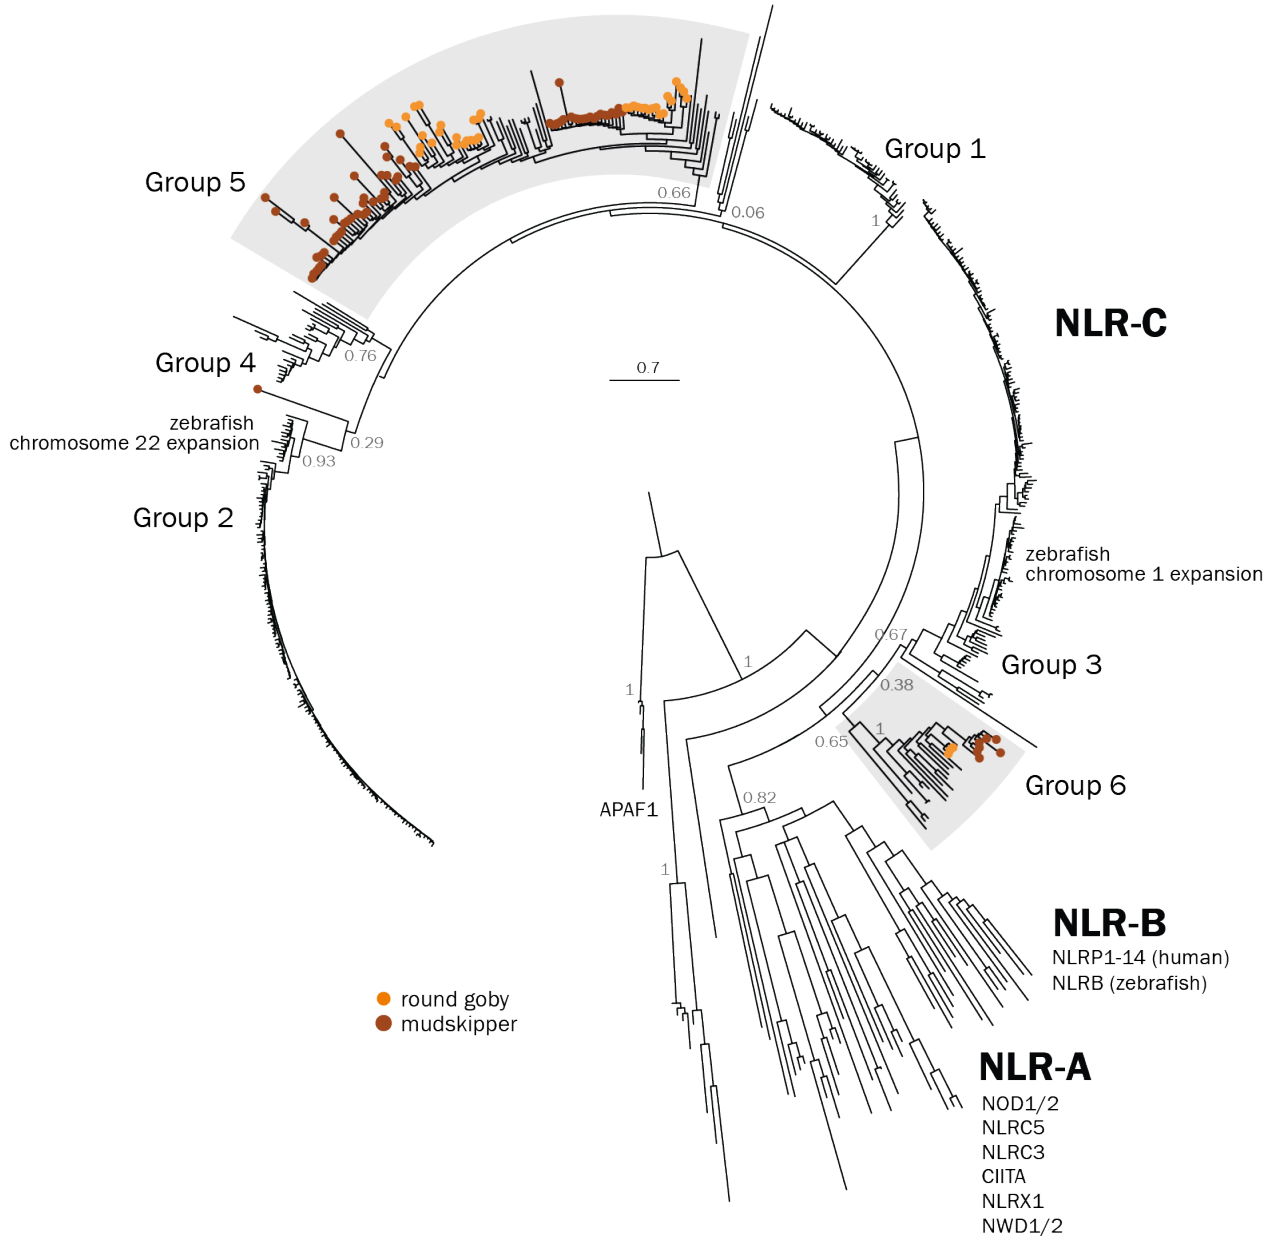

522 **Figure 10**  
523 **Phylogenetic tree of the NLR nucleotide-binding domain sequences in round goby, great blue**  
524 **dotted mudskipper, zebrafish and human. Maximum Likelihood phylogenetic tree with 500 bootstraps**  
525 **rooted at the split between NB-ARC (found in APAF1) and NACHT domains (present in all the other**  
526 **NLRs). NB-ARC domains from APAF1 orthologs were used as an outgroup. Bootstrap values are**  
527 **shown for nodes that determine an entire cluster. The tree resolves all three major classes of**  
528 **vertebrate NLRs (NLR-A, NLR-B, NLR-C). NLR-A genes were conserved in all analyzed species, no**

529 *NLR-B* genes were found from the gobies. Six groups of *NLR-C* genes were identified, four of which  
530 are exclusive to zebrafish (Group 1-4) and two contain only sequences from gobies (Groups 5 and 6).  
531 Within the goby-specific groups, lineage-specific expansions can be seen for both round goby  
532 (orange) and mudskipper (brown).

533

534 NLRs have diverse roles from direct pathogen recognition to transcriptional regulation of the MHC  
535 (NLRs CIITA and NLRC5) and contribute to inflammasome activation. Mammalian genomes display  
536 20-40 NLRs in families NLR-A and NLR-B, while fish also feature a fish-specific subfamily (NLR-C;  
537 (Laing *et al.* 2008)) and a much expanded NLR repertoire (e.g. 405 NLR-C genes in zebrafish; Howe  
538 *et al.* 2016; Tørresen *et al.* 2018). The round goby genome contains at least 353 NLRs  
539 (**Supplemental\_Table\_S8**), which include 9 highly conserved vertebrate NLRs (*NOD1*, *NOD2*,  
540 *NLRC3*, *NLRC5*, *NLRX1*, *NWD1*, *NWD2*, *APAF1*, *CIITA*) as well as 344 NLR-C genes. Fish NLRs  
541 cluster into 6 groups of which 2 represent novel NLR-C clades (groups 5 and 6, **Figure 10**). The novel  
542 groups are supported by phylogenetic analyses as well as motif presence/absence (**Table 4**). NLR-C  
543 groups are characterized by highly conserved versions of the sequence motif Walker A. The most  
544 common sequence for Walker A observed in both goby NLR-C groups, GVAGVGKT, is not associated  
545 with any of the four major NLR-C groups in zebrafish (Howe *et al.* 2016). Also, NLR subtypes often  
546 carry group-specific combinations of the protein-protein interaction domain PYD and/or B30.2 domain.  
547 This holds true for *Gobiidae* NLR-C groups, since only group 5 NLRs can carry an N-terminal PYD  
548 domain and/or a C-terminal B30.2 domain (Howe *et al.* 2016), similar to the zebrafish Group 1 and 2  
549 NLRs (**Table 4**). In contrast, some group 6 NLRs have C-terminal CARD domains, which in both  
550 human and zebrafish are attached to specific inflammasome-associated NLR-B genes (Li *et al.* 2018).  
551 The round goby C-terminal CARD-containing NLRs are found on the same few scaffolds and share a  
552 high degree of sequence similarity, indicative of a recent expansion. This expansion is absent from  
553 mudskipper and thus restricted to the round goby lineage. Many other Group 6 NLRs are fragmented,  
554 with large insertions in the middle of their conserved 2 kb exon (**Supplemental\_Table\_S8**).

555

556

557 **Table 4.** Key features of each of the six NLR-C subgroups. x denotes a variable amino acid.

| Group | Identified in this study | Walker A       | Last residues of the largest exon | PYD? | B30.2? |
|-------|--------------------------|----------------|-----------------------------------|------|--------|
| 1     |                          | GIAGVGKT       | L(I/M)PVVKNT(T/R)RA               | +    | +      |
| 2     |                          | GVAGIGKS       | LSAVIKTSKRA                       | +    | +      |
| 3     |                          | GIAGIGKT       | L(IP/TA)AV(R/S)NC(RK/TR/RR)A      | -    | +      |
| 4     |                          | GVAGIGKT       | LPV(I/V)xxxx(A/V)x                | -    | -      |
| 5     | x                        | GVAG(V/A/I)GKT | (L/M)PV(V/I)KASxK(A/V)            | +    | +      |
| 6     | x                        | GVAG(V/A)GKT   | L(I/V)P(A/V)VRNCRKA               | -    | -      |

558

559 Once activated, some NLRs (including those with a C-terminal CARD) can oligomerize and form an  
560 inflammasome in order to activate specific caspases (usually Caspase 1, **Figure 8**). The interaction  
561 between NLRs and the caspase are mediated by the adaptor protein ASC (also known as PYCARD),  
562 which itself oligomerizes into large structures known as “specks” (Kuri et al. 2017). Vertebrates have  
563 1-2 copies of ASC, which are characterized by a characteristic combination of a single PYD and  
564 CARD domain. In the round goby genome, we find 20 cases of this domain combination. Since the  
565 genomes of other gobies contain 1-2 PYD-ASC combinations, the expansion appears to be specific to  
566 the round goby (**Figure 11A**). The effector protein Caspase 1 is present as one gene in humans and  
567 as two genes in zebrafish. We find that the round goby genome features an expansion to 18 copies.  
568 Interestingly, some of those genes appear to contain a CARD domain (as seen in mammals and  
569 several species of fish) while others have PYD (as seen in zebrafish). This suggests that a caspase  
570 with both domains may have existed in the common ancestor of fish and tetrapods, with most lineages  
571 having retained only one of the two. However, phylogenetic analyses reveal that all round goby  
572 Caspase 1 genes are the result of a single expansion event specific to this species (**Figure 11B**). An  
573 alternative explanation for the presence of both PYD- and CARD-caspases 1 genes would be a  
574 recurrent acquisition of PYD in different lineages. In any case, in addition to Caspase 1 genes,  
575 caspase 3 (a key component of apoptosis which may be activated by Caspase 1) is also expanded to  
576 5 copies. Caspase 4 and 5, on the other hand, appear to be absent.

577

578 Finally, we find that genes encoding for two peptides produced in the course of inflammation, the  
579 acute phase reactants C-reactive protein (CRP) and serum amyloid component P (APCS), are  
580 expanded to a total of 25 copies (compared to 2-7 in fish, and 5-19 in the other *Gobiidae*). In fish, CRP  
581 and APCS are closely related and cannot be distinguished based on BLAST scores or phylogeny. As



582 seen in other fish species, all investigated CRP/APCS sequences resolve into two major phylogenetic  
 583 clades, with the mammalian sequences in a third (**Supplemental\_Figure\_S11**).  
 584

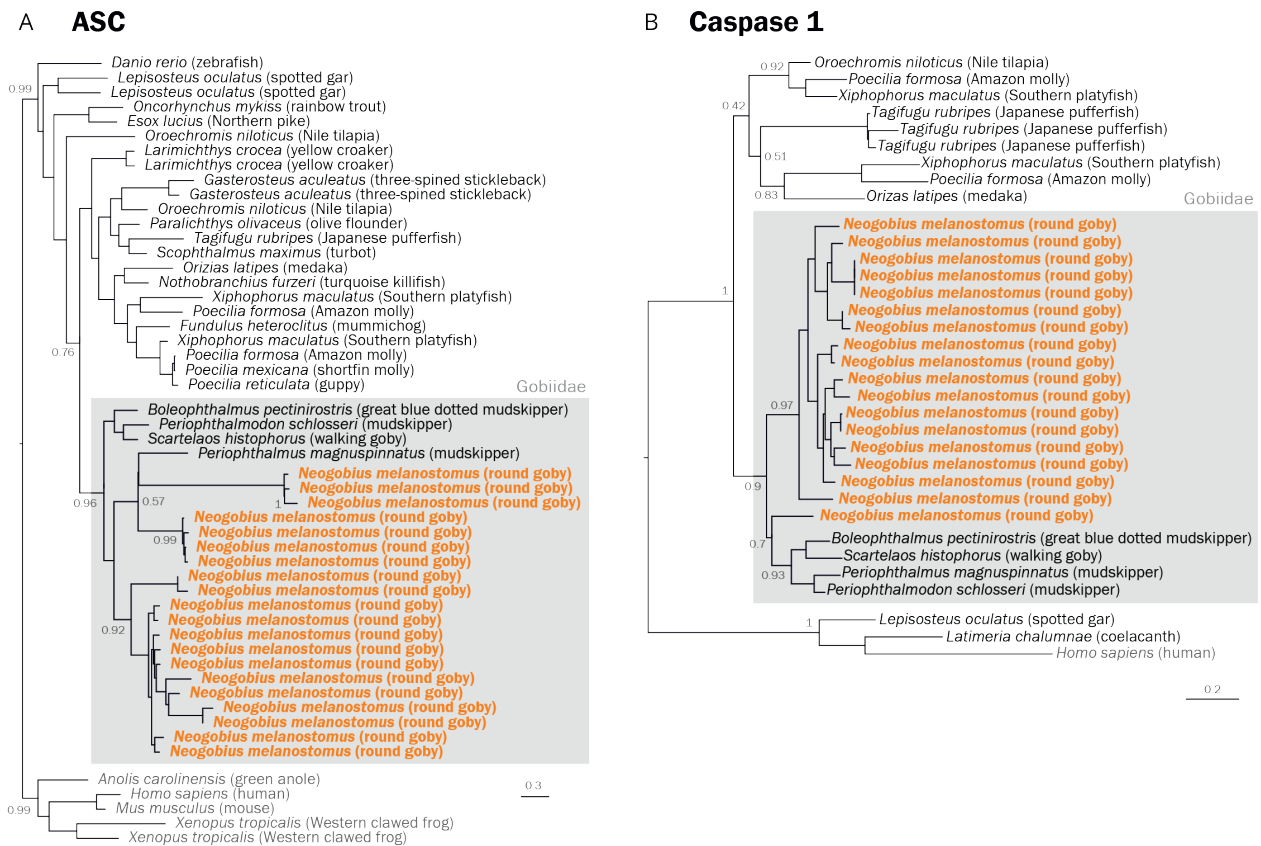

585  
 586 **Figure 11**  
 587 **A Phylogenetic tree of gnatostome ASC protein sequences. Maximum Likelihood phylogenetic**  
 588 **tree with 500 bootstraps rooted at the split between tetrapods and ray-finned fish. Tetrapods were**  
 589 **used as outgroup. Round goby is indicated in orange. Gobiidae are highlighted with a grey box. The**  
 590 **goby sequences form a clear separate cluster (marked with the box), with a large expansion apparent**  
 591 **in the round goby. B Phylogenetic tree of gnatostome Caspase 1 protein sequences The**  
 592 **Caspase 1 tree comprises all protein sequences annotated as CASP1 in the investigated Gobiiformes**  
 593 **genomes aligned together with reference sequences from Ensembl and GenBank. The root was**  
 594 **placed on the branch containing the mammalian sequences.**

595  
 596



597 **7. Adaptation to novel environments: Epigenetic regulators**

598

599 The PRC2 complex establishes and maintains gene repression (Schwartz and Pirrotta, 2013) and thus  
 600 represents a plasticity-restricting mechanism. The complex mediates di- and trimethylation of lysine 27  
 601 on histone H3 and contains four proteins: a catalytic subunit (either *enhancer of zeste* EZH1 or EZH2),  
 602 *suppressor of zeste* SUZ12, *embryonic ectoderm development* EED and *RB Binding Protein 4* RBBP4  
 603 (Margueron and Reinberg, 2011). In mammals, the alternative catalytic subunits EZH1 and EZH2 have  
 604 partially complementary roles (Mu *et al.* 2017; Xu *et al.* 2015), and requirements for the two alternative  
 605 catalytic subunits differ between species – in contrast to mammals, zebrafish develop in the absence  
 606 of either catalytic subunit (San *et al.* 2016; Völkel *et al.* 2019). We find that the round goby genome  
 607 contains the usual complement of PRC2 components: two copies of SUZ12 (of which one appears  
 608 quite diverged), one copy of EED, one copy of RBBP4, and two copies of EZH (with multiple isoforms  
 609 determined by RACE experiments). For SUZ12, EED, and RBBP4, sequence-based identification was  
 610 straightforward, and phylogenetic analyses followed the known phylogenetic relationships of fish,  
 611 mammals, and other vertebrates (**Supplemental\_Fig\_S12**). The catalytically active subunits EZH1  
 612 and EZH2 do cluster with the closest species in the phylogeny, the mudskipper *B. pectinirostris*  
 613 (**Figure 12**), but the deeper relationships within EZH2 are poorly supported and may suggest a  
 614 complex evolutionary history.

615

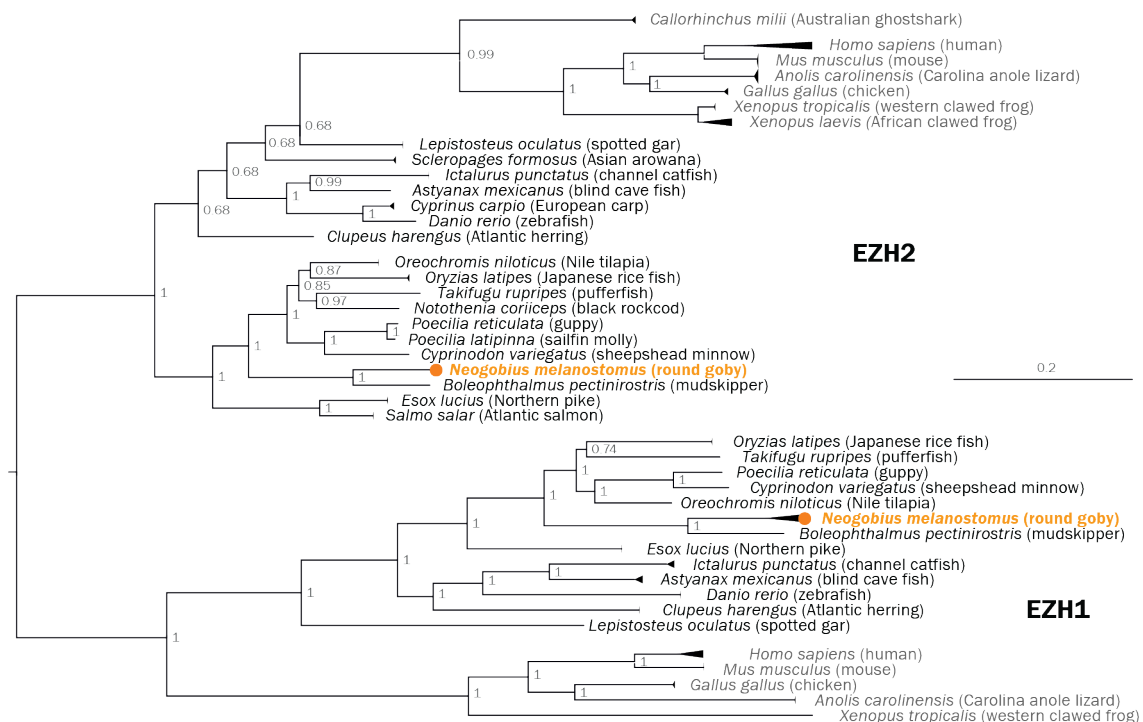

616

617 **Figure 12**

618 **Phylogenetic tree of vertebrate EZH proteins.** Midpoint-rooted Bayesian phylogenetic tree. Note the  
619 position of the Australian ghost shark (potential outgroup) within the poorly supported EZH2 branch.

620 When rooting with Australian ghost shark, teleost EZH2 genes cluster with EZH1 (data not shown).

621 Round goby is indicated in orange.

622

623 Methylation marks similarly regulate gene expression and are deposited by conserved enzymes called

624 DNA methyltransferases (DNMTs). Mammals feature two types of DNMTs, DNMT3 (three genes A, B,

625 and L) and DNMT1 (one gene). The two types perform both *de novo* and maintenance methylation,

626 respectively, in a dynamic division of labor (Jeltsch and Jurkowska, 2014). Interestingly, fish feature a

627 variable repertoire of DNMT3 genes. Medaka, fugu, zebrafish, and carp have three, five, six, and

628 twelve DNMT3 genes, respectively (Ponger and Li, 2005). We find that the round goby genome

629 features one DNMT1 gene (Supplementary Figure DNMT1) and five DNMT3 genes, of which two

630 cluster with vertebrate DNMT3A sequences, and three with vertebrate DNMT3B sequences (**Figure**

631 **13**). The number of DNMT3 genes in round goby corresponds to that seen in in stickleback, fugu and

632 tilapia (Wang F-L *et al.* 2018). In general, the DNMT3 phylogeny is not well supported, which limits

633 conclusions about the evolution of specific DNMT3 genes.

634

635

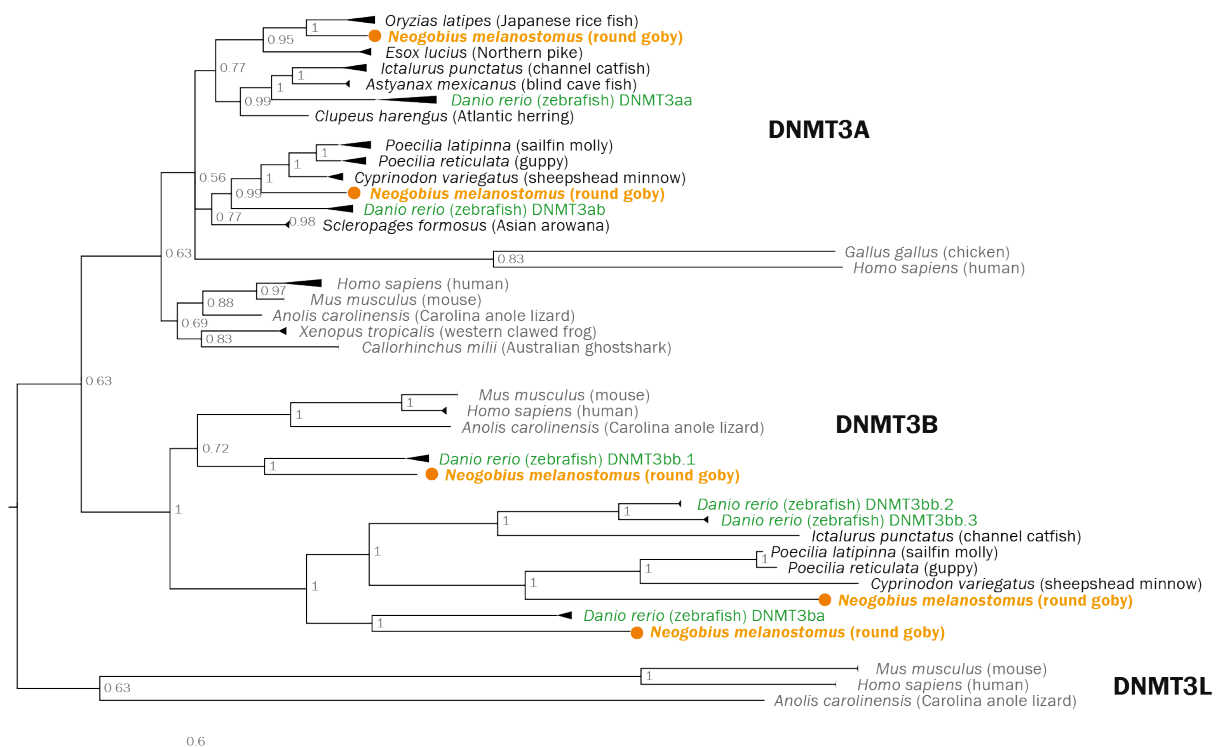

636  
637  
638  
639  
640  
641  
642  
643  
644  
645  
646  
647  
648  
649  
650  
651  
652  
653  
654  
655  
656  
657  
658  
659  
660  
661  
662  
663  
664  
665  
666

### **Figure 13**

**Phylogenetic tree of vertebrate DNMT3 proteins.** Midpoint-rooted Bayesian phylogenetic tree. The Australian ghost shark (potential outgroup) is positioned among DNMT3A genes. Round goby is indicated in orange. Zebrafish, the only other fish with well-annotated DNMT3 genes, is indicated in green.

### **Discussion**

#### **General observations**

Our analyses depict a genome that, in many respects, is similar to other teleost genomes. There is no evidence for recent genome duplications, and genome size, gene content and GC content are within the ordinary range. Transposable elements can create genetic variation and mediate ecological success (Stapley *et al.* 2015), but repeat analyses do not reveal unusual transposon activities in the round goby. Small genome size has been proposed to foster invasiveness (Pysek *et al.* 2018), but the round goby genome is not particularly small. Phylogenetic analyses reveal that many of the analyzed gene families conform to expectations. For example, green opsin gene duplications and the loss of the UV opsin are observed in many fish lineages (Musilova *et al.* 2019). Similarly, the expected gene families and overall gene complements are found for olfactory receptors, cytochrome P450, and osmoregulatory proteins, for adaptive immunity and epigenetic regulators. Multilocus sex determination has previously been suggested for freshwater gobies (Pezold, 1984), and indeed our data suggest a multigenic and/or environmental sex determination system for the round goby, rather than a large sex-determining region or a sex chromosome. Overall, these findings support the validity of the sequencing and assembly approach, and suggest that selected findings of interest are not artefacts. In addition, the round goby genome sequence also reveals several novel and interesting findings of which some pertain to teleost genomes in general, some to *Gobiidae*, and some to specific gene families, with possible implications for invasive potential.

#### **Environmental perception**

667 We find that the visual system of *Gobiidae* may be more efficient in the red parts of the light spectrum.  
668 This is intriguing considering the benthic life style of gobies and their occurrence in turbid areas. In  
669 clear waters, red light from the sun is the least abundant part of the spectrum (and virtually absent  
670 below 15m of depth) because red light penetrates least through water, but many organisms convert  
671 the deeply penetrating green and blue wavelengths into red. Indeed, the eyes of gammarids, a  
672 common prey of round goby, strongly reflect red light (Bitton *et al.* 2018). An enhanced red perception  
673 through an additional red opsin gene may thus be relevant for round goby predation success. In turbid  
674 waters, red is the most common part of the light spectrum because long wavelengths experience least  
675 scattering (Seehausen *et al.* 1997). Round gobies readily establish populations in turbid environments.  
676 The retention of two red opsin genes may thus possibly relate to the remarkable ability of the round  
677 goby to colonize turbid habitats. Our predictions based on the key amino-acid substitution suggest that  
678 LWS1 is expected to be most sensitive at 560 nm (same as one of the mudskipper gobies; You *et al.*  
679 2014), while LWS2 is expected to be most sensitive at 550 nm (Yokoyama, 2008). Similar small  
680 differences in the sensitivity maximum can indeed result in functionally different spectral tuning  
681 palettes (e.g. during development or in different environmental conditions; Carleton *et al.* 2016).  
682  
683 The presence of red fluorescence on top of the eye in round goby is the first unequivocal description  
684 of fluorescence in a freshwater fish and might be interpreted as being associated with the ability to  
685 discriminate different shades of red colors. However, the fluorescence in the specimens investigated  
686 was quite weak. Unless fluorescence expression is stronger under natural conditions or in the  
687 ancestral population from which the invading populations stem, a visual function of the weak  
688 fluorescence observed here seems unlikely (see warnings by Marshall and Johnsen, 2017).  
689 Fluorescence is, however, widespread and stronger among several marine gobies (Michiels *et al.*  
690 2008). Although the fluorescent "eyebrows" of the round goby show a striking similarity to those of  
691 some marine gobies, their function will remain unclear until properly tested. Social functions are  
692 possible – for example, in sand gobies, dark eyes indicate female readiness to spawn (Olsson *et al.*  
693 2017). Alternatively, they may simply provide camouflage for individuals buried in bright sand up to the  
694 eyes. Functional hypotheses for fluorescence, such as communication, camouflage and improved prey  
695 detection have been extensively reviewed by Anthes *et al.* 2016. The genetic tools now available for  
696 the round goby may allow for experimental manipulation of fluorescence expression, once the actual  
697 fluorophores that produce the fluorescent signal have been identified.

698

699 **Response to the environment**

700

701 With respect to ecological and physiological aspects of success and invasiveness, some findings on  
702 CYP genes, on osmoregulation, and on innate immunity call for further attention. The mostly minimal  
703 complement of cytochrome P450 proteins present in the round goby is unexpected considering the  
704 occurrence of round goby in polluted areas (Vélez-Espino *et al.* 2010; Young *et al.* 2010). The CYP1-3  
705 gene complement for xenobiotic metabolism is similar to other teleost genomes, and the ability of the  
706 round goby to survive in contaminated environments must therefore have other reasons. Round goby  
707 may cope with contaminations at the level of gene expression, either through higher basal expression  
708 values or by a particularly rapid response to exposure (Wellband and Heath, 2017). Alternatively, this  
709 species may have peculiarities in other, not yet analyzed areas of the defenseome (e.g. transporters).  
710 Analyses of the tissue expression of CYP families 1, 2 and 3, and also the study of other defenseome  
711 gene families, including the nuclear receptors regulating CYP gene expression, transporters and  
712 conjugating enzyme families, may be useful in this respect.

713

714 Another potentially relevant finding is the ability of the round goby to not only produce, but also  
715 accumulate osmolytes. Species distribution constraints often arise from physiological limitations. The  
716 round goby is one of the most geographically wide-ranging invasive fish species in Europe and North  
717 America, and the ability to accumulate osmolytes may impact its range expansion in three ways.  
718 Firstly, 0-25 PSU (common for coastal waters, but lower than the ocean) is the species' current limit  
719 for unperturbed osmoregulation (Behrens *et al.* 2017). However, the round goby's repertoire of key-  
720 genes in myo-inositol production and accumulation might bestow the species with the potential to  
721 eventually tolerate higher salinities, for example through the evolution of altered gene regulation  
722 patterns, and colonize higher PSUs. Secondly, osmolytes improve water retention and thus  
723 desiccation tolerance. In this context, myo-inositol accumulation may have contributed to overland  
724 dispersal. Overland dispersal of eggs or larvae with boats or fishing gear involves air exposure, and  
725 indeed, round goby eggs withstand desiccation for up to 48 hours (Hirsch *et al.* 2016). Finally,  
726 osmolytes essentially act as anti-freeze agents and molecular chaperones, and contribute to  
727 cryoprotection in diverse organisms from bacteria (Miladi *et al.* 2017) to flies (Vigoder *et al.* 2016).  
728 Osmolytes may thus enable the round goby to combat a number of environmental conditions and to

729 colonize new areas. The surprising and unexpected ability of the round goby to colonize cold areas  
730 well below its temperature optimum of 22°C, such as the Northern Baltic Sea, may be linked to  
731 osmolyte production.

732

733 Lastly, the “strike fast, strike hard” innate immune system and the impressively large inflammation  
734 machinery of the round goby may enhance the species’ colonization potential. Fish immunity appears  
735 to be quite plastic. For example, cod have disposed of some core adaptive immunity components (Star  
736 *et al.* 2011), yellow croaker feature an expanded TNF repertoire (Wu *et al.* 2014), and channel catfish  
737 retain a high number of recent duplications and SNPs in immune genes (Liu *et al.* 2016). Meanwhile,  
738 in salmonids, genes specifically retained after the 4<sup>th</sup> whole genome duplication are not immune genes  
739 (Berthelot 2014).

740

741 We find that the round goby genome contains multiple copies of genes for inflammasome assembly,  
742 activation, and function. This is interesting because the fish inflammasome complex is much more  
743 poorly characterized than that of mammals. Maturation of IL-1 by inflammasome-activated Caspase 1  
744 cleavage in fish is a matter of debate, since teleost IL-1 proteins lack the conserved caspase cleavage  
745 site present in mammalian IL-1b and IL-18 (Reis *et al.* 2012). However, as has been shown for  
746 zebrafish, Caspase 1 can also utilize an alternative site to cleave and mature IL-1 (Li J-Y *et al.* 2018;  
747 Vojtech *et al.* 2012). In any case, the caspases also mediate cell death via pyroptosis and the  
748 presence of other components such as ASC, caspases and pro-IL1 and pro-IL18 supports a role for  
749 inflammasomes in fish. Zebrafish ASC oligomerize and form “specks” as seen in mammals (Li Y *et al.*  
750 2018). The molecular dynamics of inflammasome activation therefore represent a potential future  
751 research avenue in the round goby.

752

753 In terms of ecological success, the round goby’s expanded repertoire of pathogen recognition  
754 receptors may broaden the scope of its immune response and increase the range of detectable  
755 ligands and pathogens. The expanded acute phase repertoire may also contribute to a fast response,  
756 or inversely, may limit excessive cell damage. In humans, the acute phase protein CRP contains  
757 inflammation as part of a negative feedback loop (Richter *et al.* 2018). Thus, the round goby may re-  
758 enter homeostasis faster compared to other fish species with smaller CRP/APCS repertoires. The  
759 larger acute phase repertoire may also function to limit the cellular damage caused by the potentially

760 large amount of inflammasome combinations the round goby can generate. In this context, we suggest  
761 systematic investigations into a potential relation between inflammasome expansions and  
762 invasiveness in *Gobiidae*, in combination with immune challenge experiments.

763

#### 764 **Long-term adaptation**

765

766 We identify a potentially interesting evolutionary history for the conserved PRC2 component EZH in  
767 fish, and add to the previous observation that the conserved *de novo* DNA methylation machinery  
768 features a surprising diversity in fish. These results underscore the need for in-depth investigations  
769 into the role and relevance of epigenetic regulation and transgenerational inheritance in teleosts. Our  
770 findings support the emerging idea that epigenetic regulation in fish follows somewhat different rules  
771 than in mammals. For the histone methylating complex PRC2, our results suggest interesting  
772 phylogenetic relationships of EZH proteins in fish. EZH proteins act in tissue specific complexes  
773 comprised of core SUZ12, EED, and RBBP4, but also AEBP2, PCL proteins and JARID2. These  
774 proteins enhance PRC2 efficiency, contribute to recruitment to target sites, or inhibit the complex  
775 (Margueron and Reinberg, 2011; Schwartz and Pirrotta, 2013). Small sequence changes can have  
776 strong effects on the entire complex, since the precise interactions among the components and with  
777 other gene regulators impact its function and localization (Cao and Zhang, 2004; Ciferri *et al.* 2012;  
778 Chittock *et al.* 2017; Cao *et al.* 2014). For example, species-specific insertions (Liu *et al.* 2015) are  
779 thought to regulate PRC2 recruitment and/or exclusion from target genes (Davidovich and Cech,  
780 2015). We suggest that the future incorporation of more sequences of both EZH1 and EZH2 from a  
781 greater range of taxa and the inclusion of currently unannotated versions of the genes associated with  
782 both the teleost specific whole genome duplication and lineage specific duplications (Völkel *et al.*  
783 2019) would aid understanding of the evolutionary history of the entire complex. We expect that  
784 studying PRC2 in non-mammalian vertebrates may reveal ancestral or less abundant interactions,  
785 functions or also complex associations of PRC2.

786

787 Similarly, our results warrant an in-depth exploration of DNA methylation in fish. Originally, DNA  
788 methylation evolved to distinguish own (methylated) DNA from foreign (non-methylated) DNA such as  
789 introduced by viruses. Therefore, cytosines in CG base contexts are by default methylated. In  
790 mammals, DNA methylation in CG dense regions (CG islands) is associated with gene repression.



791 However, DNA methylation also features species- and taxon-specific differences, even among  
792 vertebrates, which are still greatly underappreciated. For example, non-methylated genome regions in  
793 fish are unexpectedly CG-poor (Cross *et al.* 1991), fish differ from mammals with respect to the  
794 distribution of methylated CpGs in the genome (Jiang *et al.* 2014), algorithms developed on mammals  
795 fail to identify CpG islands in fish (Han and Zhao, 2008), genome-wide CpG island predictions in cold-  
796 blooded animals consist primarily of false positives (Huska and Vingron, 2016), and fish CG  
797 methylation occurs mainly in coding regions, where it correlates positively with gene expression levels  
798 (McGaughey *et al.* 2014). These curious differences are further enhanced by the seemingly random  
799 copy number variation in the *de novo* DNA methyltransferase DNMT3 in teleosts, which do not reflect  
800 genome duplication events in teleosts (Wang *et al.* 2018). DNMT3 genes display highly spatiotemporal  
801 expression patterns particularly during development (Campos *et al.* 2012; Takayama *et al.* 2014;  
802 Firmino *et al.* 2017; Wood *et al.* 2016), and an in-depth and species-aware exploration of the role of  
803 DNA methylation in fish is clearly warranted.

804

#### 805 **Gene expansions**

806

807 A general theme across several of the analyzed gene families is gene expansions. Gene expansions  
808 have been linked to invasive potential before (Wu *et al.* 2019) and are recurrent in fish genomes, both  
809 within (Berthelot *et al.* 2014; Lien *et al.* 2016) and outside (Kim *et al.* 2019; Mu *et al.* 2018; Liu *et al.*  
810 2016) the context of whole genome duplications. Many duplicated genes are known to experience  
811 rapid neofunctionalization rather than subfunctionalization (Lien 2016), and have the potential to  
812 compensate against mutation even after divergence (El-Brolosy *et al.* 2019). The round goby and its  
813 relatives are definitely strong candidates for further and systematic investigation of a link between  
814 gene expansions and colonization or invasion potential. The *Benthophilinae* group is recently  
815 diversified crowd of fish with many members inexplicably on the move (Roche *et al.* 2015), and  
816 *Gobiidae* in general share a remarkable colonization potential (Patzner *et al.* 2011; Adrian-  
817 Kalchhauser *et al.* 2017). Importantly, recent gene expansions can be difficult to resolve with short  
818 reads, and genomes based on long read sequencing (as presented here) will be instrumental in this  
819 regard.

820

821 Among the receptor families analyzed, the NLRs, TLRs, and olfactory receptors, we identify a couple  
822 of particularly beautiful case studies for recent expansions and repeated radiations. Our identification  
823 of two previously undescribed NLR-C gene families (Howe *et al.* 2016), here termed group 5 and  
824 group 6, indicates substantial diversification of NLRs in fish. Different teleost lineages appear to  
825 feature different NLR-C subfamilies with large lineage-specific expansions reminiscent of olfactory  
826 receptor repertoires. Similarly, we identify interesting cases of parallel expansions across families, and  
827 also family-specific expansions, among olfactory receptors. Both cases warrant investigations into the  
828 evolution of ligand binding repertoires. For example, 7tm1 subfamily members may be involved in the  
829 detection of distinctive types of odors relevant for round goby, and possibly, *Gobiidae* ecology  
830 (Corkum *et al.* 2006; Farwell *et al.* 2017; Tierney *et al.* 2012). Which types of odorants are detected by  
831 parallel expanded ORs, and whether these expansions serve to detect similar or different types of  
832 odorant molecules in different species, remains to be studied. Finally, the massively expanded TLR22  
833 and TLR23 families warrant an exploration of their ligand binding properties. TLR22 and TLR23 have  
834 been suggested to recognize nucleic acid ligands (Solbakken *et al.* 2016), but some also react to  
835 protein or lipid pathogen-associated patterns (Xing *et al.* 2017; Paria *et al.* 2018; Qi *et al.* 2018), and  
836 their role in fish is currently unclear.

837

838 In summary, this work provides a solid basis for future research on the genomic, genetic, and  
839 epigenetic basis of ecological success. Clearly, many more gene families or pathways may contribute  
840 to the round goby's invasion success. For example, the presented analyses barely scratch the surface  
841 of epigenetic regulation, innate immunity and transporters (e.g. of toxins). We did not investigate  
842 endocrine pathways (which govern growth and reproductive success) nor antimicrobial peptides  
843 (which contribute to innate immune defense), areas which may yield fruitful information of the success  
844 of this invader. We welcome future research using this novel genomic resource, and encourage  
845 experts on those pathways to contribute their knowledge.

846 **Methods**

847

848 A relevant note upfront is that this manuscript is the product of a long-standing collaboration of leading  
849 experts in their respective fields. The gene families analyzed differ widely with regard to sequence  
850 conservation, the number and similarity of genes within and between species, the scope of questions  
851 in the field, etc. Compare, for example, the *de novo* identification of hundreds of virtually identical NLR  
852 receptors with the manual annotation of a handful of extremely conserved DNA methyltransferases, or  
853 the phylogenetic analysis of the conserved vertebrate CYP gene family with a fish-centered  
854 comparison of osmotic balance regulators. Accordingly, each collaborator applied methods that were  
855 suited for the respective situation. As a common theme, however, findings were always verified  
856 against the mudskipper genomes.

857

858 **Genomic DNA library preparation and PacBio sequencing**

859

860 Genomic DNA was extracted from the liver of one male individual of round goby caught in Basel,  
861 Switzerland (47° 35' 18" N, 7° 35' 26" E). At the Genome Center Dresden, Germany, 300 mg of liver  
862 tissue were ground by mortar and pestle in liquid nitrogen and lysed in Qiagen G2 lysis buffer with  
863 Proteinase K. RNA was digested by RNase A treatment. Proteins and fat were removed with two  
864 cycles of phenol-chloroform extraction and two cycles of chloroform extraction. Then, DNA was  
865 precipitated in 100% ice cold ethanol, spooled onto a glass hook, eluted in 1x TE buffer, and stored at  
866 4 °C. 10 µg of DNA was cleaned using AMPure beads. From this DNA, five long insert libraries were  
867 prepared for PacBio sequencing according to the manufacturer's protocols. Genomic DNA was  
868 sheared to 30-40 kb using the Megaruptor device. The PacBio libraries were size selected for  
869 fragments larger than 15-17.5 kb using the BluePippin device. PacBio SMRT sequencing was  
870 performed with the P6/C4 chemistry using 240 min sequencing runs. Average read length was 11-12  
871 kb. In total, 86 SMRT cells were sequenced on the PacBio RSII instrument resulting in 46 gigabases  
872 (Gb; an estimated 46x coverage for a putative ~1 Gb genome) polymerase reads.

873

874

## 875 **Assembly of the round goby genome**

876

877 The round goby genome was assembled at the Heidelberg Institute for Theoretical Studies HITS  
878 gGmbH. Raw PacBio reads were assembled using the Marvel (Nowoshilow *et al.* 2018; Grohme *et al.*  
879 2018) assembler with default parameters unless mentioned otherwise. Marvel consisted of three major  
880 steps, namely the setup phase, patch phase and the assembly phase. In the setup phase, reads were  
881 filtered by choosing only the best read of each Zero-Mode Waveguide as defined by the H5dextract  
882 tool (Nowoshilow *et al.* 2018) and requiring subsequently a minimum read length of 4k. The resulting  
883 3.2 million reads were stored in an internal Marvel database. The patch phase detected and fixed read  
884 artefacts including missed adapters, polymerase strand jumps, chimeric reads and long low-quality  
885 segments that were the primary impediments to long contiguous assemblies (Nowoshilow *et al.* 2018).  
886 To better resolve those artefacts only low complexity regions were masked (DBdust) and no further  
887 repeat masking was done. The resulting patched reads longer than 3k (41x coverage) were then used  
888 for the final assembly phase. The assembly phase stitched short alignment artefacts from bad  
889 sequencing segments within overlapping read pairs. This step was followed by repeat annotation and  
890 the generation of the overlap graph, which was subsequently toured in order to generate the final  
891 contigs. By using an alignment-based approach, the final contigs were separated into a primary set  
892 and an alternative set containing bubbles and spurs in an overlap graph. To correct base errors, we  
893 first used the correction module of Marvel, which made use of the final overlap graph and corrected  
894 only the reads that were used to build the contigs. After tracking the raw reads to contigs, PacBio's  
895 Quiver (Chin *et al.* 2013) algorithm was applied twice to further polish contigs as previously described  
896 (Nowoshilow *et al.* 2018).

897

## 898 **Automated annotation of the round goby genome**

899

900 The round goby genome assembly was annotated using Maker v2.31.8 (Cantarel *et al.* 2008;  
901 Campbell *et al.* 2014). Two iterations were run with assembled transcripts from round goby  
902 embryonic tissue (Adrian-Kalchhauser *et al.* 2018) and data from eleven other actinopterygian  
903 species available in the ENSEMBL database (downloaded the 15th February 2016,  
904 <http://www.ensembl.org>, see **Table 5**) as well as the SwissProt protein set from the uniprot  
905 database as evidence (downloaded March 2, 2016; <https://www.uniprot.org/downloads>). In

906 addition, an initial set of reference sequences obtained from a closely related species, the sand  
907 goby *Pomatoschistus minutus*, sequenced by the CeMEB consortium at University of  
908 Gothenburg, Sweden (<https://cemeb.science.gu.se>), was included. The second maker iteration  
909 was run after first training the gene modeler SNAP version 2006-07-28 (Korf, 2004) based on  
910 the results from the first run. Augustus v3.2.2 (Stanke *et al.* 2008) was run with initial parameter  
911 settings from Zebrafish. Repeat regions in the genome were masked using RepeatMasker  
912 known elements (Smit *et al.* 2013-2015) and repeat libraries from Repbase (Bao *et al.* 2015) as  
913 well as *de novo* identified repeats from the round goby genome assembly obtained from a  
914 RepeatModeler analysis (Smit *et al.* 2008-2015).

915

916 **Table 5.** Summary of reference data from Ensembl used for the annotation.

| Reference species             | Number of protein sequences | Assembly version from ENSEMBL (downloaded 15th Feb 2016) |
|-------------------------------|-----------------------------|----------------------------------------------------------|
| <i>Astyanax mexicanus</i>     | 23698                       | AstMex102                                                |
| <i>Danio rerio</i>            | 44487                       | GRCz10                                                   |
| <i>Gadus morhua</i>           | 22100                       | gadMor1                                                  |
| <i>Gasterosteus aculeatus</i> | 27576                       | BROADS1                                                  |
| <i>Lepisosteus oculatus</i>   | 22483                       | LepOcu1                                                  |
| <i>Oreochromis niloticus</i>  | 26763                       | Orenil1.0                                                |
| <i>Oryzias latipes</i>        | 24674                       | MEDAKA1                                                  |
| <i>Poecilia formosa</i>       | 30898                       | PoeFor_5.1.2                                             |
| <i>Takifugu rubripes</i>      | 47841                       | FUGU4                                                    |
| <i>Tetraodon nigroviridis</i> | 23118                       | TETRAODON8                                               |
| <i>Xiphophorus maculatus</i>  | 20454                       | Xipmac4.4.2                                              |

917

918 In order to assess the completeness and quality of the current assembly and the associated gene  
919 models, the assembly and the predicted protein sequences were run against reference sets at two  
920 different taxonomical levels (303 eukaryotic and 4584 actinopterygian single copy orthologues) using  
921 the BUSCO pipeline v2.0 (Waterhouse *et al.* 2017; Kriventseva *et al.* 2015).

922

923 The maker annotation results were used to generate a database for JBrowse/Webapollo using the  
924 script "maker2jbrowse" included with JBrowse (Dunn *et al.*; Lee *et al.* 2013). Predicted protein and  
925 transcript sequences were used to query the uniprot database, using blastp and blastn respectively,  
926 and the best hit descriptions were transferred to the fasta headers with scripts bundled with Maker as  
927 described in Campbell *et al.* 2014. The annotated genome is currently hosted on a WebApollo  
928 genome browser and Blast server at the University of Gothenburg, Sweden at

929 <http://albiorix.bioenv.gu.se/>.

930 Our analyses reveal that some degree of care is warranted regarding gene models. *De novo*  
931 annotation without transcriptome data tends to be biased towards known and conserved genes,  
932 homopolymer sequencing errors may cause annotation errors, and fish proteins have diverged faster  
933 than mammalian homologs (Jaillon 2004). For example, 25% of human genes cannot be identified in  
934 the pufferfish (Aparicio *et al.* 2002). Even in the well-characterized zebrafish, targeted approaches  
935 have the potential to reveal additional novel genes (Pauli *et al.* 2012). We therefore encourage  
936 researchers to consider genome-wide blast searches in addition to a consultation of round goby gene  
937 models, and hope that extensive RNA sequencing data can be generated in the future to improve the  
938 predictions.

939

#### 940 **Sex determining regions**

941

942 To investigate whether the round goby genome features large sex determining regions, we analyzed  
943 our available RAD sequencing data. We prepared restriction site-associated DNA (RAD; Baird *et al.*  
944 2008) libraries following the protocol used by Roesti *et al.* (2012; 2015), which is largely based  
945 on Hohenlohe *et al.* (2010). In short, we used the Sbf1 enzyme on DNA extracted from 57 females, 56  
946 males, and 5 juveniles, and pooled 39-40 individuals per library for SR 100bp sequencing with  
947 Illumina. 45 females and 47 males retained sufficient numbers of reads (>150000) per sample after  
948 cleaning and demultiplexing, were processed with the Stacks pipeline using the genome independent  
949 approach (Rochette and Catchen, 2017), and were analyzed for sex-specific loci present exclusively in  
950 males or females. Considering a genome size of ~1GB, the presence of 23 chromosomes (Ocalewicz  
951 and Sapota, 2011), and a calling success of 21877 loci in 95 or 96 individuals (49220 loci in at least 40  
952 individuals), we expected an average density of one RAD locus every 45710 (20316) bp and an  
953 average number of 951 (2140) markers for an average sized chromosome. The presence of a sex  
954 chromosome should thus be indicated by hundreds of sex-specific RAD loci, while a contiguous sex  
955 determining region larger than 45000 bp would be indicated by one or more sex specific RAD loci.  
956 Read numbers per locus for each sample were extracted from the \*.matches.tsv file output from  
957 Stacks and analyzed for sex-specific loci with standard R table manipulations.

958

959

960 **Vision**

961

962 Opsin genes were extracted from the genome assembly using the Geneious software  
963 (<http://www.geneious.com>, Kearse *et al.* 2012) by mapping the genomic scaffolds (Medium Sensitivity,  
964 70% identity threshold) against individual opsin exons of Nile tilapia (*Oreochromis niloticus*; GenBank  
965 Acc. no.: MKQE00000000.1). This led to capturing of all scaffolds containing any visual opsin. The  
966 genes were then annotated by mapping back of the single exons of tilapia against each scaffold  
967 separately (High Sensitivity; 50% identity threshold) combined with the Live Annotate & Predict  
968 function as implemented in Geneious, based on the Nile tilapia and mudskipper (You *et al.* 2014)  
969 opsin gene annotation. All regions upstream and downstream from every opsin gene, as well as the  
970 intergenic regions were separately tested for presence of any further opsin gene or its fragment  
971 (pseudogene). The annotated genes were checked for the reading frame and the putative protein  
972 product was predicted.

973

974 We next performed phylogenetic analysis on the visual opsin genes (i.e. SWS1, SWS2, RH2, RH1 and  
975 LWS opsins) across vertebrates, with focus on selected model species of teleost fishes. We further  
976 specifically focused on the LWS genes from the fish species or lineages known to possess multiple  
977 LWS copies, such as livebearers and pupfishes (Cyprinodontiformes; Ward *et al.* 2008), zebrafish  
978 (*Danio rerio*, Rennison *et al.* 2012) salmon (*Salmo salar*, Lin *et al.* 2017), common carp (*Cyprinus*  
979 *carpio*; Lin *et al.* 2017), cavefish (*Astyanax mexicanus*, Register *et al.* 1994), Northern pike (*Esox*  
980 *lucius*; Lin *et al.* 2017), labyrinth fishes (*Anabas testudineus*, Musilova *et al.* 2019), Asian arowana  
981 (*Scleropages formosus*, Lin *et al.* 2017) as well as other gobies, such as mudskippers (You *et al.*  
982 2014) and reef gobies (Musilova *et al.* 2019). The opsin gene sequences from round goby and other  
983 fish species, including outgroup of non-visual opsins (pinopsin, parietopsin, vertebrate-ancestral  
984 opsins and opn3 opsin; **Supplemental\_Material\_S2**) were aligned using the MAFFT (Kato *et al.*  
985 2005) plugin (v1.3.5) under the L-ins-i algorithm as implemented in Geneious. Exon 5 (exon 6 in case  
986 of LWS) and part of exon 1 (or entire exon 1 in case of LWS), which provided ambiguous alignment  
987 due to their higher variability, were discarded. We estimated the model parameters by jModeltest 2.1.6  
988 (Darriba *et al.* 2012; Guindon and Gascuel, 2003), and subsequently used the bayesian inference to  
989 calculate single-gene phylogeny using the MrBayes 3.2.6 (Ronquist and Huelsenbeck, 2003) software  
990 as implemented on the CIPRES Science gateway (Miller *et al.* 2010).



991 **Olfaction**

992

993 Olfactory receptor (OR) peptide sequences to be used as a reference were extracted from a publicly  
994 available *Oreochromis niloticus* protein dataset (Brawand *et al.* 2014). Those references were blasted  
995 (tblastn) against the genomes of the round goby (*Neogobius melanostomus*), the blue-spotted  
996 mudskipper (*Boleophthalmus pectinirostris*, You *et al.* 2014), the giant mudskipper (*Periophthalmodon*  
997 *magnuspinatus*, You *et al.* 2014) and the three-spined stickleback (*Gasterosteus aculeatus*, Peichel *et*  
998 *al.* 2017), using an e-value threshold of  $10e^{-50}$ . Only the hit with highest bit-score for each genomic  
999 position with more than one alignment was employed in subsequent steps. Mapped hits belonging to  
1000 contiguous positions of the protein (maximum overlap of 15 aminoacids) and with a genomic distance  
1001 smaller than 10kb were joined as exons of the same CDS-gene model. Obtained sequences were  
1002 translated to proteins using TransDecoder (<http://transdecoder.github.io>), filtering all models that  
1003 produce peptides smaller than 250 aminoacids. While many ORs are usually around 300 aminoacids  
1004 long in total, 250 is close to the average size of their main transmembrane domain, which is centrally  
1005 located in the protein and more suitable to interspecific alignment compared to N-terminal and C-  
1006 terminal ends. We acknowledge that this method might introduce a reduced proportion of recent  
1007 pseudogenes that could lead to a small overestimation of OR genes with coding capacity, although all  
1008 species should be affected equivalently.

1009

1010 Next, an hmmscan (<http://hmmer.org/>) was produced against Pfam database to identify the domain  
1011 with highest score for each obtained protein sequence. We also filtered against false positive detection  
1012 using blast against confident OR and non-OR protein datasets. For phylogenetic analysis, sequences  
1013 (**Supplemental\_Material\_S3**) were aligned with MAFFT (<https://mafft.cbrc.jp/alignment/server/>) and a  
1014 Maximum Likelihood methodology was employed to build the tree using W-IQ-TREE software  
1015 (Trifinopoulos *et al.* 2016) with standard parameters and Ultrafast bootstrap (Hoang *et al.* 2018). Four  
1016 adrenergic receptor sequences from *Oreochromis niloticus* were used as an outgroup. Monophyletic  
1017 groups formed by five or more genes of the same species were considered as lineage-specific gene  
1018 expansions. Because of the phylogenetic proximity of the two mudskippers and the differences in their  
1019 genome assembly statistics, only *B. pectinirostris* was considered and *P. magnuspinatus* sequences  
1020 were allowed to be included in their lineage-specific expansion groups.

1021

1022 **Detoxification**

1023

1024 The Basic Local Alignment Search Tool (BLAST, v. 2.2.31) (Altschul, 1990) was used to identify local  
1025 alignments between the round goby genome and a query including all annotated CYPs in humans and  
1026 zebrafish (vertebrate) and the most dissimilar invertebrate CYPs from *Drosophila melanogaster*  
1027 (arthropod), *Caenorhabditis elegans* (nematode) and *Capitella teleta* (annelid);

1028 **Supplemental\_Material\_S4**). Only BLAST high scoring pairs with Expect values of  $1.0 \times 10^{-10}$  or  
1029 smaller were considered significant.

1030

1031 The JBrowse genome viewer (v1.12.1) was used to manually annotate the significant regions of each  
1032 genome from the BLAST search, identifying start (ATG) and stop (TGA/TAA/TAG) codons, exon  
1033 number, and splice site signals (GT/AG) at intron-exon boundaries. The lengths of the potential CYPs  
1034 were identified and considered full length at ~500 amino acid residues long. Potential genes were  
1035 matched to the well-curated cytochrome P450 HMM in the Pfam protein family database (Finn *et al.*  
1036 2010) to confirm identity. The ScanProsite tool (Sigrist *et al.* 2010) was used to verify the presence of  
1037 four largely conserved CYP motifs: the I-helix, K-helix, meander coil and heme loop. Each gene was  
1038 classified as 'complete' (proper length with start and stop codon, all motifs present, and match to the  
1039 HMM) or 'partial' (presence of at least the entire ~120 amino acid region that contains all motifs but  
1040 clearly less than full length). Any potential CYP that was missing at least one of the motifs was  
1041 considered a gene 'fragment' (**Supplemental\_Table\_S9**).

1042

1043 All of the 'complete' and 'partial' round goby CYPs (**Supplemental\_Table\_S9**) were included in further  
1044 analyses. Clustal Omega (v1.2.4) (Sievers *et al.* 2011) was used to generate a multiple sequence  
1045 alignment of the round goby sequences and a variety of well-known vertebrate CYPs from humans,  
1046 *Danio rerio*, *Mus musculus*, *Xenopus laevis*, *Gallus gallus*, and *Rattus norvegicus* (125 sequences in  
1047 total; **Supplemental\_Material\_S5**). Mesquite (v3.10) (Maddison and Maddison, 2016) was utilized to  
1048 trim the alignment, especially at the termini of the protein sequences where significant variation is  
1049 typically observed, leaving only the portion of the alignment representative of the homology of the  
1050 sequences. The final 'masked' alignment (**Supplemental\_Material\_S6**) was used as input for the  
1051 Randomized Axelerated Maximum Likelihood program (RAxML v8.2.10) (Stamatakis, 2014). 100  
1052 bootstrap trees were generated with the rapid generation algorithm (-x) and a gamma distribution. The

1053 JTT substitution matrix with empirical frequencies was implemented in tree generation. The final  
1054 maximum likelihood phylogenetic tree was visualized with Figtree (v1.4.3) (Rambaut, 2016) and rooted  
1055 with the CYP51 family of enzymes.

1056

## 1057 **Osmoregulation**

1058

1059 Protein sequences for aquaporins, tight junction proteins, ion transporters, and enzymes in osmolyte  
1060 production pathways were retrieved from the round goby genome by BLASTing well-characterized  
1061 proteins from zebrafish, downloaded from Uniprot (March 2018), against the round goby gene  
1062 models/proteins. Only round goby gene-models/proteins for which the predicted protein covered at  
1063 least 70%, with a sequence identity of at least 40% and with E-value  $< 10^{-20}$  of the corresponding  
1064 protein in zebrafish were used for the phylogenetic analyses. Well-established paralogues belonging  
1065 to different subclasses of the respective protein family, based on either literature search or from initial  
1066 phylogenetic analysis of that particular protein family, were used as additional query sequences to  
1067 minimize the risk of missing relevant round goby sequences. Osmoregulatory genes from human and  
1068 zebrafish were used for overall classification of clades in the respective protein family. Some  
1069 modifications were made to the retrieved round goby sequences before analysis: i) For NHE ion  
1070 transporters, a 780 aa long non-homologous N-terminus from one of the *Neogobius* sequences was  
1071 removed before the phylogenetic analysis. ii) Some of the claudin genes were subjected to manual  
1072 curation of Maker predicted proteins. The claudin genes in fish consist of several tandem arrays, which  
1073 in some cases results in merging of 2-4 claudin genes by the Maker software. Claudins have a typical  
1074 trans-membrane (TM) pattern with four distinct TM domains. All manually curated claudin genes from  
1075 round goby were examined to have the expected four TM domains by TMHMM searches. Round goby  
1076 protein sequences after manual curation are available in the supplement

1077 **(Supplemental\_Material\_S7).**

1078

1079 No myo-inositol phosphate synthase (MIPS) and sodium/inositol cotransporter (SMIT) proteins from  
1080 zebrafish was found in Uniprot. To confirm that there are truly no MIPS and SMIT genes in zebrafish,  
1081 the zebrafish genome at NCBI was also searched for homologies using blastp and tblastn using as  
1082 query the MIPS and SMIT protein sequences from tilapia as query, and no hits were found. Thus, in  
1083 the case of MIPS and SMIT, tilapia sequences were used for searching for round goby homologues.

1084 For the phylogenetic analyses, protein sequences from zebrafish (*Danio rerio*), three spine stickleback  
1085 (*Gasterosteus aculeatus*), tilapia (*Oreochromis niloticus*), mudskipper (*Boleophthalmus pectinirostris*)  
1086 and *Homo sapiens* (exception for human NKA-beta) were used in comparison to round goby, and  
1087 were obtained from Uniprot (zebrafish, stickleback, tilapia, human) or RefSeq (mudskipper;  
1088 **Supplemental\_Material\_S7**). Phylogenetic analyses of osmoregulatory proteins in round goby were  
1089 performed using maximum likelihood with PhyML v3.0 with 100 bootstraps and using Gblocks to  
1090 eliminate poorly aligned positions and highly divergent regions. PhyML analyses were performed at  
1091 the Phylogeny.fr website (<http://www.phylogeny.fr>) using default settings.

1092

### 1093 **Immune system**

1094

1095 To perform an overall characterization of key genes related to the immune system, protein queries  
1096 representing core components of innate and acquired immunity from several fish species as well as  
1097 mammalian reference sequences were downloaded from UniProt and Ensembl. The protein queries  
1098 were aligned prior to usage to ensure sequence homology. We also added previously extracted  
1099 protein sequences from the Toll-like receptor family, reported by Solbakken et al. (2016), and MHC I  
1100 sequences reported by Grimholt et al. (2015). All queries are listed in **Supplemental\_Table\_S4**. To  
1101 enable comparative analyses between sequenced Gobiiformes, the genomes of *Periophthalmodon*  
1102 *schlosseri* (GCA\_000787095.1), *Periophthalmus magnuspinatus* (GCA\_000787105.1), *Scartelaos*  
1103 *histophorus* (GCA\_000787155.1) and *Boleophthalmus pectinirostris* (GCA\_000788275.1) were  
1104 additionally downloaded from NCBI.

1105

1106 All protein queries were used in a tblastn (blast+ v. 2.6.0) towards the round goby genome assembly  
1107 using default parameters and a e-value cutoff of 1e-10 (Camacho *et al.* 2009). Some queries  
1108 (*caspase-1*, *TLRs*, *IL1* and *IL8*) were also used in an identical tblastn towards the other Gobiiformes  
1109 genomes. Genomic hit regions were extracted using BEDtools (v. 2.17.0) extending both up- and  
1110 downstream as needed to obtain full length gene sequences (Quinlan and Hall, 2010). The extracted  
1111 genomic regions were imported into MEGA7, the reading frame was adjusted for each exon and  
1112 aligned as proteins to the corresponding translated coding sequence of queries using MUSCLE with  
1113 default parameters. Intronic sequences were removed leaving an in-frame coding sequence (Edgar,

1114 2004; Kumar *et al.* 2016). All alignments were subjected to manual evaluation before subsequent  
1115 analysis.

1116

1117 To generate phylogenetic trees, protein alignments were made and model tested using the ProtTest3  
1118 server ([http://darwin.uvigo.es/software/prottest\\_server.html](http://darwin.uvigo.es/software/prottest_server.html)) specifying BIC and no tree optimization  
1119 (server has been disabled but ProtTest is available for download from GitHub; Durrin *et al.* 2011). All  
1120 alignments reported the JTT model as best hit. Maximum likelihood trees were produced by using  
1121 RAxML-PTHREADS (v 8.0.26), PROTCATJTT, rapid bootstrap and 500 bootstrap replicates  
1122 (Stamatakis, 2006). The final trees were imported into FigTree  
1123 (<http://tree.bio.ed.ac.uk/software/figtree/>), and subsequently Adobe Illustrator, for presentation  
1124 purposes.

1125

1126 In order to identify members of the large multigenic family of fish-specific NACHT and Leucine-Rich  
1127 Repeats containing genes (NLRs; the fish-specific subset is also known as NLR-C; Laing *et al.* 2008),  
1128 an alignment of 368 zebrafish NLR-C proteins was obtained from Howe *et al.* 2016 (Howe *et al.* 2016).  
1129 A combination of tblastn, HMMER3 searches (Eddy, 2011) and alignments with MAFFT v7.310 (Katoh  
1130 and Standley, 2013) was used to generate first an initial list of “candidate regions” potentially  
1131 containing an NLR (**Supplemental\_Material\_S6**) and then an annotation of the characteristic domains  
1132 in round goby NLR-C family members (see **Supplemental\_Material\_S9**) and  
1133 **Supplemental\_Table\_S8** for details), consisting of 25 PYRIN , 1 N-terminal CARD, 12 C-terminal  
1134 CARD, 343 FISNA-NACHT and 178 B30.2 domains. Custom HMM models for major NLR exons  
1135 (FISNA-NACHT, and PRY-SPRY/B30.2) were generated and utilized during this process  
1136 (Supplementary Methods, **Supplemental\_Material\_S10**). The majority of identified FISNA-NACHT  
1137 exons contained frameshifts or a large insertion, indicating either pseudogenization, acquisition of new  
1138 introns, problems with the assembly, or a combination of the three (Wang P *et al.* 2018). In any case,  
1139 for the subsequent phylogenetic analysis, only the 61 clearly intact NLRs were used. These were  
1140 aligned with NLRs from human, zebrafish and the mudskipper goby using MAFFT  
1141 (**Supplemental\_Material\_S9**; **Supplemental\_Material\_S11**); Maximum Likelihood trees were  
1142 produced with RAxML-PTHREADS, PROTCATJTT, rapid bootstrap and 500 bootstrap replicates  
1143 (Stamatakis, 2006). The final trees were imported into FigTree  
1144 (<http://tree.bio.ed.ac.uk/software/figtree/>), and subsequently Adobe Illustrator. The alignments were

1145 inspected manually for presence of the conserved Walker A motifs and sequence logos for these were  
1146 generated with WebLogo (Crooks *et al.* 2004). Finally, we performed a survey of the PYD domains,  
1147 Peptidase\_C14 domains (Caspases) and CARD. All cases of a PYD domain followed by an adjacent  
1148 CARD in the round goby (putative apoptosis-associated speck-like protein containing a CARD (ASC),  
1149 also known as PYD-CARD or PYCARD) were identified from the HMMER3 dataset. The open reading  
1150 frames containing these were translated, concatenated, and aligned with similarly structured proteins  
1151 from human, mouse, lizard, frog and all the fish in Ensembl, and with PYD-CARDs identified from the  
1152 other available goby assemblies (**Supplemental\_Material\_S12**). A phylogenetic tree was generated  
1153 as described above. The annotation for NLR-C genes consists of predicted positions for all of the  
1154 major conserved NLR-associated domains (PYD, CARD, FISNA-NACHT-helices, LRRs, B30.2;  
1155 **Supplemental\_Table\_S8**).

1156

### 1157 **Epigenetic regulators**

1158

1159 We focused on two gene expression regulators which are conserved among all eukaryotes: the  
1160 Polycomb Repressive Complex 2 (PRC2), which deposits repressive histone methylation marks, and  
1161 the DNA methylases, which methylate cytosine in CpG contexts. The presence of both marks is  
1162 commonly associated with a downregulation of gene expression. The protein sequences of zebrafish  
1163 orthologues of PRC2 components RBBP2, EED, EZH1-2, and SUZ12 (Margueron and Reinberg,  
1164 2011) and of DNA methylases DNMT1 and DNMT3 (Edwards *et al.* 2017) were blasted against the  
1165 round goby genome using default parameters of the Albiortix Blast server. The protein sequence of  
1166 predicted proteins at the hit site was extracted manually in the round goby genome browser and  
1167 aligned with mouse, human, and zebrafish protein sequences. When the first and/or last exon  
1168 sequences as predicted in the round goby genome differed significantly from the mouse, human, and  
1169 zebrafish sequences, we attempted confirmation by 3' and 5'RACE on RNA extracted from whole  
1170 juvenile animals (see **Supplemental\_Material\_S13** for primer sequences and PCR conditions). A  
1171 putative CDS was combined from automated annotation and RACE results, and aligned to sequences  
1172 extracted from a variety of fish taxa, shark, chicken, frog, lizard, and human  
1173 (**Supplemental\_Material\_S14**). Given the high conservation of these proteins in eukaryotes, and the  
1174 absence of major unexpected differences between round goby and other vertebrates, additional  
1175 Gobiidae were not included in the analyses. In order to perform codon aware alignment MACSE

1176 (Ranwez *et al.* 2011) was used. The model and partitioning scheme used for each phylogenetic  
1177 analysis was estimated using PartitionFinder2 (Lanfear *et al.* 2017) using PhyML (Guindon *et al.* 2010)  
1178 with corrected AIC scores (AICc) used for model selection. Phylogenetic analyses were performed  
1179 using MrBayes 3.2.6 (Ronquist *et al.* 2012; Huelsenbeck and Ronquist, 2001) with three independent  
1180 runs for each gene. Analyses were run for 2,000,000 generations or until the standard deviation of  
1181 split frequencies was below 0.01 up to a maximum of 20,000,000 generations. In order to aid  
1182 convergence in the EZH analyses the temperature parameter was set to 0.05.

1183

#### 1184 **Transposable elements**

1185

1186 A number of different applications were used for the repeat annotation of the genome. They are  
1187 described in the repeat annotation report (**Supplemental\_Material\_S15**). In summary, in addition to  
1188 the identification of repeats with RepeatModeler (as described above), we used TRF (Benson, 1999)  
1189 to predict tandem repeats. RepeatMasker (Smit *et al.* 2013-2015), a homology-based approach was  
1190 used to produce a genome-wide overview of interspersed repeats. LTR Finder (Xu and Wang, 2007)  
1191 and LTRharvest (Ellinghaus *et al.* 2008) in combination with LTRdigest (Steinbiss *et al.* 2009), both de  
1192 novo approaches, were used to predict LTRs.

1193

#### 1194 **Data access**

1195

1196 This Whole Genome Shotgun project has been deposited at DDBJ/ENA/GenBank under the  
1197 accession VHKM00000000. The version described in this paper is version VHKM01000000.  
1198 Various Illumina reads are available under the accessions indicated in Table 1.

1199

#### 1200 **Funding**

1201

1202 ZM was funded by the Czech Science Foundation (16-09784Y) and the Swiss National Science  
1203 Foundation (PROMYS - 166550). DB was funded by CZ.02.2.69/0.0/0.0/16\_027/0008495 -  
1204 International Mobility of Researchers at Charles University. Genome sequencing was funded with a  
1205 contribution of the Freiwillige Akademische Gesellschaft Basel to IAK. KP was funded by an  
1206 Undergraduate Student Research Award and a Discovery grant RGPIN5767-16 (to JYW) from the



1207 Natural Sciences and Engineering Research Council of Canada. MT, TL and MAR were funded by the  
1208 Center for Marine Evolutionary Biology. JS was funded by grants LE 546/9-1 and WI 3081/5-1 within  
1209 the Deutsche Forschungsgemeinschaft (DFG) - funded Priority Programme SPP1819. MHS was  
1210 funded by the Norwegian Research Council (grant numbers 199806/S40 and 222378/F20). AB was  
1211 funded by the Swedish Research Council (VR; #2017-04559).

1212

## 1213 **Acknowledgements**

1214

1215 We thank Fabio Cortesi for his insightful comments and the Center for Marine Evolutionary Biology for  
1216 hosting a Blast server and a genome browser. Computational resources were provided by the  
1217 CESNET LM2015042 and the CERIT Scientific Cloud LM2015085, provided under the programme  
1218 "Projects of Large Research, Development, and Innovations Infrastructures". We thank Maria Leptin  
1219 for her helpful comments and advice during annotation of the inflammasome components.

1220

## 1221 **Author contributions**

1222

1223 Sylke Winkler isolated DNA and generated PacBio reads, Martin Pippel and Siegfried Schloissnig  
1224 assembled the genome sequence, and Tomas Larsson, Mats Tölpel and Magnus Alm Rosenblad  
1225 performed automated annotation and provided the genome browser and Blast server.

1226

1227 Jean-Claude Walser provided transposable element analyses, Silvia Gutnik, Claire Peart, and Irene  
1228 Adrian-Kalchhauser provided DNA methyltransferase and PRC2 analyses, Anders Blomberg provided  
1229 osmoregulation analyses, Monica Hongroe Solbakken and Jaanus Suurväli provided immune gene  
1230 analyses, Zuzana Musilova and Demian Burguera provided vision and olfaction analyses, Joanna  
1231 Yvonne Wilson and Kirill Pankov provided CYP gene analyses, Nico Michiels investigated red  
1232 fluorescence.

1233

1234 Irene Adrian-Kalchhauser initiated, designed, and supervised the project, acquired the necessary  
1235 funding, coordinated annotation efforts, compiled the manuscript and handled the submission process.

1236

1237

1238 **Permissions**

1239

1240 Fish used in this work were caught in accordance with permission 2-3-6-4-1 from the Cantonal Office

1241 for Environment and Energy, Basel Stadt.

1242

1243

1244 **REFERENCES**

- 1245 Adrian-Kalchhauser I, Svensson O, Kutschera VE, Alm Rosenblad M, Pippel M, Winkler S,  
1246 Schloissnig S, Blomberg A, Burkhardt-Holm P. 2017. The mitochondrial genome sequences of the  
1247 round goby and the sand goby reveal patterns of recent evolution in gobiid fish. *BMC GENOMICS*  
1248 **18**:177. DOI: 10.1186/s12864-017-3550-8.
- 1249 Adrian-Kalchhauser I, Walser J-C, Schwaiger M, Burkhardt-Holm P. 2018. RNA sequencing of early  
1250 round goby embryos reveals that maternal experiences can shape the maternal RNA contribution in  
1251 a wild vertebrate. *BMC EVOLUTIONARY BIOLOGY* **18**:34. DOI: 10.1186/s12862-018-1132-2.
- 1252 Altschul S. 1990. Basic Local Alignment Search Tool. *Journal of Molecular Biology* **215**:403–410.  
1253 DOI: 10.1006/jmbi.1990.9999.
- 1254 Amemiya CT, Alföldi J, Lee AP, Fan S, Philippe H, MacCallum I, Braasch I, Manousaki T, Schneider  
1255 I, Rohner N, et al. 2013. The African coelacanth genome provides insights into tetrapod evolution.  
1256 *NATURE* **496**:311 EP -. DOI: 10.1038/nature12027.
- 1257 Anthes N, Theobald J, Gerlach T, Meadows MG, Michiels NK. 2016. Diversity and Ecological  
1258 Correlates of Red Fluorescence in Marine Fishes. *FRONTIERS IN ECOLOGY AND EVOLUTION*  
1259 **4**. DOI: 10.3339/fevo.2016.00126.
- 1260 Aparicio S, Chapman J, Stupka E, Putnam N, Chia J-M, Dehal P, Christoffels A, Rash S, Hoon S,  
1261 Smit A, et al. 2002. Whole-Genome Shotgun Assembly and Analysis of the Genome of *Fugu*  
1262 *rubripes*. *Science* **297**:1301. DOI: 10.1126/science.1072104.
- 1263 Baird NA, Etter PD, Atwood TS, Currey MC, Shiver AL, Lewis ZA, Selker EU, Cresko WA, Johnson  
1264 EA. 2008. Rapid SNP Discovery and Genetic Mapping Using Sequenced RAD Markers. *PLoS*  
1265 *ONE* **3**:e3376. DOI: 10.1371/journal.pone.0003376.
- 1266 Bao W, Kojima KK, Kohany O. 2015. Repbase Update, a database of repetitive elements in eukaryotic  
1267 genomes. *MOBILE DNA* **6**. DOI: 10.1186/s13100-015-0041-9.
- 1268 Barth FG, Schmid A, Douglas RH (eds). 2001. The Ecology of Teleost Fish Visual Pigments: a Good  
1269 Example of Sensory Adaptation to the Environment?: Ecology of Sensing. Springer Berlin  
1270 Heidelberg Germany.
- 1271 Behrens JW, van Deurs M, Christensen EAF. 2017. Evaluating dispersal potential of an invasive fish  
1272 by the use of aerobic scope and osmoregulation capacity. *PLoS ONE* **12**:e0176038. DOI:  
1273 10.1371/journal.pone.0176038.
- 1274 Benson G. 1999. Tandem repeats finder: A program to analyze DNA sequences. *NUCLEIC ACIDS*  
1275 *RESEARCH* **27**:573–580.
- 1276 Berthelot C, Brunet F, Chalopin D, Juanchich A, Bernard M, Noël B, Bento P, Da Silva C, Labadie K,  
1277 Alberti A, et al. 2014. The rainbow trout genome provides novel insights into evolution after  
1278 whole-genome duplication in vertebrates. *NATURE COMMUNICATIONS* **5**:3657. DOI:  
1279 10.1038/ncomms4657.
- 1280 Bitton P-P, Christmann SAY, Santon M, Harant UK, Michiels NK. 2018. Visual modelling validates  
1281 prey detection by means of diurnal active photolocation in a small cryptobenthic fish.  
1282 *bioRxiv*:338640. DOI: 10.1101/338640.
- 1283 Bock DG, Caseys C, Cousens RD, Hahn MA, Heredia SM, Hübner S, Turner KG, Whitney KD,  
1284 Rieseberg LH. 2014. What we still don't know about invasion genetics. *Molecular Ecology*. DOI:  
1285 10.1111/mec.13032.
- 1286 Bowley LA, Alam F, Marentette JR, Balshine S, Wilson JY. 2010. Characterization of vitellogenin  
1287 gene expression in round goby (*Neogobius melanostomus*) using a quantitative polymerase chain  
1288 reaction assay. *Environmental toxicology and chemistry / SETAC* **29**:2751–2760. DOI:  
1289 10.1002/etc.324.
- 1290 Bowmaker JK, Hunt DM. 2006. Evolution of vertebrate visual pigments. *Current Biology* **16**:R484-  
1291 R489.

- 1292 Brawand D, Wagner CE, Li YI, Malinsky M, Keller I, Fan S, Simakov O, Ng AY, Lim ZW, Bezault  
1293 E, et al. 2014. The genomic substrate for adaptive radiation in African cichlid fish. *NATURE*  
1294 **513**:375–381. DOI: 10.1038/nature13726.
- 1295 Busserolles F de, Cortesi F, Helvik JV, Davies WIL, Templin RM, Sullivan RKP, Michell CT,  
1296 Mountford JK, Collin SP, Irigoien X, et al. 2017. Pushing the limits of photoreception in twilight  
1297 conditions: The rod-like cone retina of the deep-sea pearlsides. *SCIENCE ADVANCES* **3**. DOI:  
1298 10.1126/sciadv.aao4709.
- 1299 Camacho C, Coulouris G, Avagyan V, Ma N, Papadopoulos J, Bealer K, Madden TL. 2009. BLAST+:  
1300 Architecture and applications. *BMC BIOINFORMATICS* **10**:421. DOI: 10.1186/1471-2105-10-421.
- 1301 Campbell MS, Holt C, Moore B, Yandell M. 2014. Genome Annotation and Curation Using MAKER  
1302 and MAKER-P. *Current protocols in bioinformatics* **48**:4.11.1-39. DOI:  
1303 10.1002/0471250953.bi0411s48.
- 1304 Campos C, Valente LMP, Fernandes JMO. 2012. Molecular evolution of zebrafish dnmt3 genes and  
1305 thermal plasticity of their expression during embryonic development. *GENE* **500**:93–100. DOI:  
1306 10.1016/j.gene.2012.03.041.
- 1307 Cantarel BL, Korf I, Robb SMC, Parra G, Ross E, Moore B, Holt C, Sánchez Alvarado A, Yandell M.  
1308 2008. MAKER: An easy-to-use annotation pipeline designed for emerging model organism  
1309 genomes. *GENOME RESEARCH* **18**:188–196. DOI: 10.1101/gr.6743907.
- 1310 Cao Q, Wang X, Zhao M, Yang R, Malik R, Qiao Y, Poliakov A, Yocum AK, Li Y, Chen W, et al.  
1311 2014. The central role of EED in the orchestration of polycomb group complexes. *NATURE*  
1312 *COMMUNICATIONS* **5**:3127. DOI: 10.1038/ncomms4127.
- 1313 Cao R, Zhang Y. 2004. SUZ12 is required for both the histone methyltransferase activity and the  
1314 silencing function of the EED-EZH2 complex. *Molecular cell* **15**:57–67.
- 1315 Carleton KL, Dalton BE, Escobar-Camacho D, Nandamuri SP. 2016. Proximate and ultimate causes of  
1316 variable visual sensitivities: Insights from cichlid fish radiations. *genesis* **54**:299–325. DOI:  
1317 10.1002/dvg.22940.
- 1318 Chin C-S, Alexander DH, Marks P, Klammer AA, Drake J, Heiner C, Clum A, Copeland A,  
1319 Huddleston J, Eichler EE, et al. 2013. Nonhybrid, finished microbial genome assemblies from  
1320 long-read SMRT sequencing data. *NATURE METHODS* **10**:563. DOI: 10.1038/NMETH.2474.
- 1321 Chittock EC, Latwiel S, Miller TCR, Müller CW. 2017. Molecular architecture of polycomb  
1322 repressive complexes. *Biochemical Society transactions* **45**:193–205. DOI: 10.1042/BST20160173.
- 1323 Choi J, Lyons DB, Kim Y, Moore JD, Zilberman D. 2019. DNA methylation and histone H1  
1324 cooperatively repress transposable elements and aberrant intragenic transcripts.  
1325 **doi:** <https://doi.org/10.1101/527523>
- 1326 Ciferri C, Lander GC, Maiolica A, Herzog F, Aebersold R, Nogales E. 2012. Molecular architecture of  
1327 human polycomb repressive complex 2. *eLife* **1**:e00005. DOI: 10.7554/eLife.00005.
- 1328 Corkum LD, Arbuckle WJ, Belanger AJ, Gammon DB, Li W, Scott AP, Zielinski B. 2006. Evidence  
1329 of a Male Sex Pheromone in the Round Goby (*Neogobius melanostomus*). *Biol Invasions* **8**:105–  
1330 112. DOI: 10.1007/s10530-005-0333-y.
- 1331 Cortesi F, Musilova Z, Stieb SM, Hart NS, Siebeck UE, Malmstrom M, Torresen OK, Jentoft S,  
1332 Cheney KL, Marshall NJ, et al. 2015. Ancestral duplications and highly dynamic opsin gene  
1333 evolution in percomorph fishes. *PROCEEDINGS OF THE NATIONAL ACADEMY OF SCIENCES*  
1334 *OF THE UNITED STATES OF AMERICA* **112**:1493–1498. DOI: 10.1073/pnas.1417803112.
- 1335 Cortijo S, Wardenaar R, Colomé-Tatché M, Gilly A, Etcheverry M, Labadie K, Caillieux E, Hospital  
1336 F, Aury J-M, Wincker P, et al. 2014. Mapping the Epigenetic Basis of Complex Traits. *Science*  
1337 **343**:1145. DOI: 10.1126/science.1248127.
- 1338 Crooks GE, Hon G, Chandonia J-M, Brenner SE. 2004. WebLogo: A sequence logo generator.  
1339 *GENOME RESEARCH* **14**:1188–1190. DOI: 10.1101/gr.849004.

- 1340 Cross S, Kovarik P, Schmidtke J, Bird A. 1991. Non-methylated islands in fish genomes are GC-poor.  
1341 *NUCLEIC ACIDS RESEARCH* **19**:1469–1474. DOI: 10.1093/nar/19.7.1469.
- 1342 Darriba D, Taboada GL, Doallo R, Posada D. 2011. ProtTest 3: Fast selection of best-fit models of  
1343 protein evolution. *Bioinformatics (Oxford, England)* **27**:1164–1165. DOI:  
1344 10.1093/bioinformatics/btr088.
- 1345 Darriba D, Taboada GL, Doallo R, Posada D. 2012. jModelTest 2: More models, new heuristics and  
1346 parallel computing. *NATURE METHODS* **9**:772. DOI: 10.1038/nmeth.2109.
- 1347 David GM, Staentzel C, Schlumberger O, Perrot-Minnot M-J, Beisel J-N, Hardion L. 2018. A  
1348 minimalist macroparasite diversity in the round goby of the Upper Rhine reduced to an exotic  
1349 acanthocephalan lineage. *Parasitology* **145**:1020–1026. DOI: 10.1017/S0031182017002177.
- 1350 Davidovich C, Cech TR. 2015. The recruitment of chromatin modifiers by long noncoding RNAs:  
1351 Lessons from PRC2. *RNA (New York, N.Y.)* **21**:2007–2022. DOI: 10.1261/rna.053918.115.
- 1352 Dejong CA, Wilson JY. 2014. The Cytochrome P450 Superfamily Complement (CYPome) in the  
1353 Annelid *Capitella teleta*. *PLoS ONE* **9**:e107728. DOI: 10.1371/journal.pone.0107728.
- 1354 Dufour BA, Hogan TM, Heath DD. 2007. Ten polymorphic microsatellite markers in the invasive  
1355 round goby (*Neogobius melanostomus*) and cross-species amplification. *MOLECULAR ECOLOGY*  
1356 *NOTES* **7**:1205–1207. DOI: 10.1111/j.1471-8286.2007.01833.x.
- 1357 Dunn NA, Unni D, Buels R, Sargent L, Diesch C, Lewis SE, Holmes IH. GMOD/Apollo: 2.2.0  
1358 JB#1.15.4-release.
- 1359 Eddy SR. 2011. Accelerated Profile HMM Searches. *PLOS COMPUTATIONAL BIOLOGY* **7**. DOI:  
1360 10.1371/journal.pcbi.1002195.
- 1361 Edgar RC. 2004. MUSCLE: A multiple sequence alignment method with reduced time and space  
1362 complexity. *BMC BIOINFORMATICS* **5**:113. DOI: 10.1186/1471-2105-5-113.
- 1363 Edwards JR, Yarychivska O, Boulard M, Bestor TH. 2017. DNA methylation and DNA  
1364 methyltransferases. *EPIGENETICS & CHROMATIN* **10**:23. DOI: 10.1186/s13072-017-0130-8.
- 1365 El-Brolosy MA, Kontarakis Z, Rossi A, Kuenne C, Günther S, Fukuda N, Kikhi K, Boezio GLM,  
1366 Takacs CM, Lai S-L, et al. 2019. Genetic compensation triggered by mutant mRNA degradation.  
1367 *NATURE* **568**:193–197. DOI: 10.1038/s41586-019-1064-z.
- 1368 Ellinghaus D, Kurtz S, Willhoeft U. 2008. LTRharvest, an efficient and flexible software for de novo  
1369 detection of LTR retrotransposons. *BMC BIOINFORMATICS* **9**:18. DOI: 10.1186/1471-2105-9-18.
- 1370 Farwell M, Hughes G, Smith JL, Clelland E, Loeb SJ, Semeniuk C, Scott AP, Li W, Zielinski B. 2017.  
1371 Differential female preference for individual components of a reproductive male round goby  
1372 (*Neogobius melanostomus*) pheromone. *JOURNAL OF GREAT LAKES RESEARCH* **43**:379–386.  
1373 DOI: 10.1016/j.jglr.2016.12.007.
- 1374 Feinberg AP, Irizarry RA. 2010. Stochastic epigenetic variation as a driving force of development,  
1375 evolutionary adaptation, and disease. *PROCEEDINGS OF THE NATIONAL ACADEMY OF*  
1376 *SCIENCES OF THE UNITED STATES OF AMERICA* **107**:1757–1764. DOI:  
1377 10.1073/pnas.0906183107.
- 1378 Feldheim KA, Willink P, Brown JE, Murphy DJ, Neilson ME, Stepien CA. 2009. Microsatellite loci  
1379 for Ponto-Caspian gobies: markers for assessing exotic invasions. *Molecular Ecology Resources*  
1380 **9**:639–644. DOI: 10.1111/j.1755-0998.2008.02495.x.
- 1381 Finn RD, Mistry J, Tate J, Coggill P, Heger A, Pollington JE, Gavin OL, Gunasekaran P, Ceric G,  
1382 Forslund K, Holm L, Sonnhammer ELL, Eddy SR, Bateman A. 2010. The Pfam protein families  
1383 database. *NUCLEIC ACIDS RESEARCH* **38**:D211–22. DOI: 10.1093/nar/gkp985.
- 1384 Finn RN, Cerdà J. 2011. Aquaporin evolution in fishes. *Frontiers in physiology* **2**:44. DOI:  
1385 10.3389/fphys.2011.00044.



- 1386 Finn RN, Chauvigné F, Hlidberg JB, Cutler CP, Cerdà J. 2014. The Lineage-Specific Evolution of  
1387 Aquaporin Gene Clusters Facilitated Tetrapod Terrestrial Adaptation. *PLoS ONE* **9**:e113686. DOI:  
1388 10.1371/journal.pone.0113686.
- 1389 Firmino J, Carballo C, Armesto P, Campinho MA, Power DM, Machado M. 2017. Phylogeny,  
1390 expression patterns and regulation of DNA Methyltransferases in early development of the flatfish,  
1391 *Solea senegalensis*. *BMC DEVELOPMENTAL BIOLOGY* **17**:11. DOI: 10.1186/s12861-017-0154-  
1392 0.
- 1393 Flajnik MF. 2018. A cold-blooded view of adaptive immunity. *Nature reviews. Immunology* **18**:438–  
1394 453. DOI: 10.1038/s41577-018-0003-9.
- 1395 Gibbs DJ, Tedds HM, Labandera A-M, Bailey M, White MD, Hartman S, Sprigg C, Mogg SL,  
1396 Osborne R, Dambire C, et al. 2018. Oxygen-dependent proteolysis regulates the stability of  
1397 angiosperm polycomb repressive complex 2 subunit VERNALIZATION 2. *NATURE*  
1398 *COMMUNICATIONS* **9**:5438. DOI: 10.1038/s41467-018-07875-7.
- 1399 Goldstone JV, Hamdoun A, Cole BJ, Howard-Ashby M, Nebert DW, Scally M, Dean M, Epel D,  
1400 Hahn ME, Stegeman JJ. 2006. The chemical defensome: Environmental sensing and response  
1401 genes in the *Strongylocentrotus purpuratus* genome. *DEVELOPMENTAL BIOLOGY* **300**:366–384.  
1402 DOI: 10.1016/j.ydbio.2006.08.066.
- 1403 Goldstone JV, McArthur AG, Kubota A, Zanette J, Parente T, Jönsson ME, Nelson DR, Stegeman JJ.  
1404 2010. Identification and developmental expression of the full complement of Cytochrome P450  
1405 genes in Zebrafish. *BMC GENOMICS* **11**:643. DOI: 10.1186/1471-2164-11-643.
- 1406 Gregory TR. 2019. Animal Genome Size Database.
- 1407 Grimholt U, Tsukamoto K, Azuma T, Leong J, Koop BF, Dijkstra JM. 2015. A comprehensive  
1408 analysis of teleost MHC class I sequences. *BMC EVOLUTIONARY BIOLOGY* **15**:32. DOI:  
1409 10.1186/s12862-015-0309-1.
- 1410 Grimm SA, Shimbo T, Takaku M, Thomas JW, Auerbach S, Bennett BD, Bucher JR, Burkholder AB,  
1411 Day F, Du Y, et al. 2019. DNA methylation in mice is influenced by genetics as well as sex and life  
1412 experience. *NATURE COMMUNICATIONS* **10**:305. DOI: 10.1038/s41467-018-08067-z.
- 1413 Grohme MA, Schloissnig S, Rozanski A, Pippel M, Young GR, Winkler S, Brandl H, Henry I, Dahl  
1414 A, Powell S, et al. 2018. The genome of *Schmidtea mediterranea* and the evolution of core cellular  
1415 mechanisms. *NATURE* **554**:56–61. DOI: 10.1038/nature25473.
- 1416 Guindon S, Dufayard J-F, Lefort V, Anisimova M, Hordijk W, Gascuel O. 2010. New algorithms and  
1417 methods to estimate maximum-likelihood phylogenies: Assessing the performance of PhyML 3.0.  
1418 *Systematic biology* **59**:307–321. DOI: 10.1093/sysbio/syq010.
- 1419 Guindon S, Gascuel O. 2003. A simple, fast, and accurate algorithm to estimate large phylogenies by  
1420 maximum likelihood. *Systematic biology* **52**:696–704.
- 1421 Guo H, Callaway JB, Ting JP-Y. 2015. Inflammasomes: Mechanism of action, role in disease, and  
1422 therapeutics. *NATURE MEDICINE* **21**:677–687. DOI: 10.1038/nm.3893.
- 1423 Han L, Zhao Z. 2008. Comparative analysis of CpG islands in four fish genomes. *Comparative and*  
1424 *functional genomics*:565631. DOI: 10.1155/2008/565631.
- 1425 Hardie DC, Hebert PDN. 2003. The nucleotypic effects of cellular DNA content in cartilaginous and  
1426 ray-finned fishes. *GENOME* **46**:683–706. DOI: 10.1139/G03-040.
- 1427 Hardie DC, Hebert PDN. 2004. Genome-size evolution in fishes. *Can. J. Fish. Aquat. Sci.* **61**:1636–  
1428 1646. DOI: 10.1139/F04-106.
- 1429 Herman JJ, Sultan SE. 2016. DNA methylation mediates genetic variation for adaptive  
1430 transgenerational plasticity. *Proceedings of the Royal Society B: Biological Sciences*  
1431 **283**:20160988. DOI: 10.1098/rspb.2016.0988.
- 1432 Hirsch PE, Adrian-Kalchhauser I, Flämig S, N’Guyen A, Defila R, Di Giulio A, Burkhardt-Holm P.  
1433 2016. A tough egg to crack: recreational boats as vectors for invasive goby eggs and

- 1434 transdisciplinary management approaches. *Ecology and evolution* **6**:707–715. DOI:  
1435 10.1002/ece3.1892.
- 1436 Hirsch PE, N’Guyen A, Adrian-Kalchhauser I, Burkhardt-Holm P. 2015. What do we really know  
1437 about the impacts of one of the 100 worst invaders in Europe? A reality check. *Ambio*. DOI:  
1438 10.1007/s13280-015-0718-9.
- 1439 Hoang DT, Chernomor O, Haeseler A von, Minh BQ, Le Vinh S. 2018. UFBoot2: Improving the  
1440 Ultrafast Bootstrap Approximation. *MOLECULAR BIOLOGY AND EVOLUTION* **35**:518–522.  
1441 DOI: 10.1093/molbev/msx281.
- 1442 Hohenlohe PA, Bassham S, Etter PD, Stiffler N, Johnson EA, Cresko WA. 2010. Population  
1443 Genomics of Parallel Adaptation in Threespine Stickleback using Sequenced RAD Tags. *PLOS*  
1444 *GENETICS* **6**:e1000862. DOI: 10.1371/journal.pgen.1000862.
- 1445 Hornsby MAW, Sabbah S, Robertson RM, Hawryshyn CW. 2013. Modulation of environmental light  
1446 alters reception and production of visual signals in Nile tilapia. *JOURNAL OF EXPERIMENTAL*  
1447 *BIOLOGY* **216**:3110–3122. DOI: 10.1242/jeb.081331.
- 1448 Howe K, Schiffer PH, Zielinski J, Wiehe T, Laird GK, Marioni JC, Soylemez O, Kondrashov F,  
1449 Leptin M. 2016. Structure and evolutionary history of a large family of NLR proteins in the  
1450 zebrafish. *Open biology* **6**:160009. DOI: 10.1098/rsob.160009.
- 1451 Huelsenbeck JP, Ronquist F. 2001. MRBAYES: Bayesian inference of phylogenetic trees.  
1452 *BIOINFORMATICS* **17**:754–755.
- 1453 Huska M, Vingron M. 2016. Improved Prediction of Non-methylated Islands in Vertebrates Highlights  
1454 Different Characteristic Sequence Patterns. *PLOS COMPUTATIONAL BIOLOGY* **12**. DOI:  
1455 10.1371/journal.pcbi.1005249.
- 1456 Hwang P-P, Chou M-Y. 2013. Zebrafish as an animal model to study ion homeostasis. *Pflügers Archiv*  
1457 *- European Journal of Physiology* **465**:1233–1247. DOI: 10.1007/s00424-013-1269-1.
- 1458 Jaenisch R, Bird A. 2003. Epigenetic regulation of gene expression: How the genome integrates  
1459 intrinsic and environmental signals. *Nature genetics* **33**:245 EP -. DOI: 10.1038/ng1089.
- 1460 Jeltsch A, Jurkowska RZ. 2014. New concepts in DNA methylation. *Trends in Biochemical Sciences*  
1461 **39**:310–318. DOI: 10.1016/j.tibs.2014.05.002.
- 1462 Jiang N, Wang L, Chen J, Wang L, Leach L, Luo Z. 2014. Conserved and Divergent Patterns of DNA  
1463 Methylation in Higher Vertebrates. *GENOME BIOLOGY AND EVOLUTION* **6**:2998–3014. DOI:  
1464 10.1093/gbe/evu238.
- 1465 Jude DJ, Reider RH, Smith GR. 1992. Establishment of Gobiidae in the Great Lakes Basin. *Can. J.*  
1466 *Fish. Aquat. Sci.* **49**:416–421. DOI: 10.1139/f92-047.
- 1467 Katoh K, Kuma K, Toh H, Miyata T. 2005. MAFFT version 5: Improvement in accuracy of multiple  
1468 sequence alignment. *NUCLEIC ACIDS RESEARCH* **33**:511–518. DOI: 10.1093/nar/gki198.
- 1469 Katoh K, Standley DM. 2013. MAFFT multiple sequence alignment software version 7:  
1470 Improvements in performance and usability. *MOLECULAR BIOLOGY AND EVOLUTION* **30**:772–  
1471 780. DOI: 10.1093/molbev/mst010.
- 1472 Kearse M, Moir R, Wilson A, Stones-Havas S, Cheung M, Sturrock S, Buxton S, Cooper A,  
1473 Markowitz S, Duran C, et al. 2012. Geneious Basic: An integrated and extendable desktop software  
1474 platform for the organization and analysis of sequence data. *BIOINFORMATICS* **28**:1647–1649.  
1475 DOI: 10.1093/bioinformatics/bts199.
- 1476 Kenaley CP, Devaney SC, Fjeran TT. 2014. The complex evolutionary history of seeing red:  
1477 Molecular phylogeny and the evolution of an adaptive visual system in deep-sea dragonfishes  
1478 (Stomiiformes: Stomiidae). *Evolution; international journal of organic evolution* **68**:996–1013.  
1479 DOI: 10.1111/evo.12322.



- 1480 Kim B-M, Amores A, Kang S, Ahn D-H, Kim J-H, Kim I-C, Lee JH, Lee SG, Lee H, Lee J, et al.  
1481 2019. Antarctic blackfin icefish genome reveals adaptations to extreme environments. *Nature*  
1482 *ecology & evolution* **3**:469–478. DOI: 10.1038/s41559-019-0812-7.
- 1483 Kirischian N, McArthur AG, Jesuthasan C, Krattenmacher B, Wilson JY. 2011. Phylogenetic and  
1484 functional analysis of the vertebrate cytochrome p450 2 family. *JOURNAL OF MOLECULAR*  
1485 *EVOLUTION* **72**:56–71. DOI: 10.1007/s00239-010-9402-7.
- 1486 Korf I. 2004. Gene finding in novel genomes. *BMC BIOINFORMATICS* **5**.
- 1487 Kriventseva EV, Zdobnov EM, Simão FA, Ioannidis P, Waterhouse RM. 2015. BUSCO: Assessing  
1488 genome assembly and annotation completeness with single-copy orthologs. *BIOINFORMATICS*  
1489 **31**:3210–3212. DOI: 10.1093/bioinformatics/btv351.
- 1490 Kumar S, Stecher G, Tamura K. 2016. MEGA7: Molecular Evolutionary Genetics Analysis version  
1491 7.0 for bigger datasets. *MOLECULAR BIOLOGY AND EVOLUTION*. DOI:  
1492 10.1093/molbev/msw054.
- 1493 Laframboise AJ, Katare Y, Scott AP, Zielinski BS. 2011. The Effect of Elevated Steroids Released by  
1494 Reproductive Male Round Gobies, *Neogobius melanostomus*, on Olfactory Responses in Females.  
1495 *JOURNAL OF CHEMICAL ECOLOGY* **37**:260–262. DOI: 10.1007/s10886-011-9923-6.
- 1496 Laing KJ, Purcell MK, Winton JR, Hansen JD. 2008. A genomic view of the NOD-like receptor  
1497 family in teleost fish: Identification of a novel NLR subfamily in zebrafish. *BMC*  
1498 *EVOLUTIONARY BIOLOGY* **8**. DOI: 10.1186/1471-2148-8-42.
- 1499 Lanfear R, Frandsen PB, Wright AM, Senfeld T, Calcott B. 2017. PartitionFinder 2: New Methods for  
1500 Selecting Partitioned Models of Evolution for Molecular and Morphological Phylogenetic  
1501 Analyses. *MOLECULAR BIOLOGY AND EVOLUTION* **34**:772–773. DOI:  
1502 10.1093/molbev/msw260.
- 1503 Lee CE. 2002. Evolutionary genetics of invasive species. *TRENDS IN ECOLOGY & EVOLUTION*  
1504 **17**:386–391. DOI: 10.1016/S0169-5347(02)02554-5.
- 1505 Lee E, Helt GA, Reese JT, Munoz-Torres MC, Childers CP, Buels RM, Stein L, Holmes IH, Elsiek CG,  
1506 Lewis SE. 2013. Web Apollo: A web-based genomic annotation editing platform. *Genome biology*  
1507 **14**:R93. DOI: 10.1186/gb-2013-14-8-r93.
- 1508 Lee KA, Klasing KC. 2004. A role for immunology in invasion biology. *TRENDS IN ECOLOGY &*  
1509 *EVOLUTION* **19**:523–529. DOI: 10.1016/j.tree.2004.07.012.
- 1510 Li J-T, Hou G-Y, Kong X-F, Li C-Y, Zeng J-M, Li H-D, Xiao G-B, Li X-M, Sun X-W. 2015. The fate  
1511 of recent duplicated genes following a fourth-round whole genome duplication in a tetraploid fish,  
1512 common carp (*Cyprinus carpio*). *Scientific reports* **5**:8199 EP -. DOI: 10.1038/srep08199.
- 1513 Li J-Y, Gao K, Shao T, Fan D-D, Hu C-B, Sun C-C, Dong W-R, Lin A-F, Xiang L-X, Shao J-Z. 2018.  
1514 Characterization of an NLRP1 Inflammasome from Zebrafish Reveals a Unique Sequential  
1515 Activation Mechanism Underlying Inflammatory Caspases in Ancient Vertebrates. *Journal of*  
1516 *immunology (Baltimore, Md. 1950)* **201**:1946–1966. DOI: 10.4049/jimmunol.1800498.
- 1517 Li Y, Huang Y, Cao X, Yin X, Jin X, Liu S, Jiang J, Jiang W, Xiao TS, Zhou R, Cai G, Hu B, Jin T.  
1518 2018. Functional and structural characterization of zebrafish ASC. *FEBS J* **285**:2691–2707. DOI:  
1519 10.1111/febs.14514.
- 1520 Li Y-C, Chiang C-W, Yeh H-C, Hsu P-Y, Whitby FG, Wang L-H, Chan N-L. 2008. Structures of  
1521 prostacyclin synthase and its complexes with substrate analog and inhibitor reveal a ligand-specific  
1522 heme conformation change. *JOURNAL OF BIOLOGICAL CHEMISTRY* **283**:2917–2926. DOI:  
1523 10.1074/jbc.M707470200.
- 1524 Lien S, Koop BF, Sandve SR, Miller JR, Kent MP, Nome T, Hvidsten TR, Leong JS, Minkley DR,  
1525 Zimin A, et al. 2016. The Atlantic salmon genome provides insights into rediploidization. *NATURE*  
1526 **533**:200 EP -. DOI: 10.1038/nature17164.

- 1527 Lin J-J, Wang F-Y, Li W-H, Wang T-Y. 2017. The rises and falls of opsin genes in 59 ray-finned fish  
1528 genomes and their implications for environmental adaptation. *Scientific reports* **7**. DOI:  
1529 10.1038/s41598-017-15868-7.
- 1530 Liu D-W, Wang F-Y, Lin J-J, Thompson A, Lu Y, Vo D, Yan HY, Zakon H. 2019. The cone opsin  
1531 repertoire of osteoglossomorph fishes: gene loss in mormyrid electric fish and a long wavelength-  
1532 sensitive cone opsin that survived 3R. *MOLECULAR BIOLOGY AND EVOLUTION* **36**:447–457.  
1533 DOI: 10.1093/molbev/msy241.
- 1534 Liu S, Sun K, Jiang T, Feng J. 2015. Natural epigenetic variation in bats and its role in evolution. *The*  
1535 *Journal of experimental biology* **218**:100–106. DOI: 10.1242/jeb.107243.
- 1536 Liu Z, Liu S, Yao J, Bao L, Zhang J, Li Y, Jiang C, Sun L, Wang R, Zhang Y, et al. 2016. The channel  
1537 catfish genome sequence provides insights into the evolution of scale formation in teleosts.  
1538 *NATURE COMMUNICATIONS* **7**. DOI: 10.1038/ncomms11757.
- 1539 Loh YH, Christoffels A, Brenner S, Hunziker W, Venkatesh B. 2004. Extensive Expansion of the  
1540 Claudin Gene Family in the Teleost Fish, *Fugu rubripes*. *GENOME RESEARCH* **14**:1248–1257.  
1541 DOI: 10.1101/gr.2400004.
- 1542 Luch A, Baird WM. Metabolic activation and detoxification of polycyclic aromatic hydrocarbons. In  
1543 *The carcinogenic effects of polycyclic aromatic hydrocarbons*; 19–96.
- 1544 Maddison WP, Maddison MP. 2016. Mesquite: a modular system for evolutionary analysis. **Version**  
1545 **3.10**.
- 1546 Margueron R, Reinberg D. 2011. The Polycomb complex PRC2 and its mark in life. *NATURE*  
1547 **469**:343–349. DOI: 10.1038/nature09784.
- 1548 Marshall J, Johnsen S. 2017. Fluorescence as a means of colour signal enhancement. *Philosophical*  
1549 *Transactions of the Royal Society B: Biological Sciences* **372**. DOI: 10.1098/rstb.2016.0335.
- 1550 Martinez P, Vinas AM, Sanchez L, Diaz N, Ribas L, Piferrer F. 2014. Genetic architecture of sex  
1551 determination in fish: Applications to sex ratio control in aquaculture. *Frontiers in genetics* **5**. DOI:  
1552 10.3389/fgene.2014.00340.
- 1553 Mashoof S, Criscitiello MF. 2016. Fish Immunoglobulins. *Biology* **5**:45. DOI:  
1554 10.3390/biology5040045.
- 1555 McConnell SC, Hernandez KM, Wcisel DJ, Kettleborough RN, Stemple DL, Yoder JA, Andrade J,  
1556 Jong JLO de. 2016. Alternative haplotypes of antigen processing genes in zebrafish diverged early  
1557 in vertebrate evolution. *PROCEEDINGS OF THE NATIONAL ACADEMY OF SCIENCES OF*  
1558 *THE UNITED STATES OF AMERICA* **113**:E5014–E5023. DOI: 10.1073/pnas.1607602113.
- 1559 McGaughey DM, Abaan HO, Miller RM, Kropp PA, Brody LC. 2014. Genomics of CpG methylation  
1560 in developing and developed zebrafish. *G3 (Bethesda, Md.)* **4**:861–869. DOI:  
1561 10.1534/g3.113.009514.
- 1562 Michalek M, Puntala R, Strake S, Werner M. HELCOM Baltic Sea Environment Fact Sheet 2012.
- 1563 Michiels NK, Anthes N, Hart NS, Herler J, Meixner AJ, Schleifenbaum F, Schulte G, Siebeck UE,  
1564 Sprenger D, Wucherer MF. 2008. Red fluorescence in reef fish: A novel signalling mechanism?  
1565 *BMC ECOLOGY* **8**:14pp.
- 1566 Miladi H, Elabed H, Ben Slama R, Rhim A, Bakhrouf A. 2017. Molecular analysis of the role of  
1567 osmolyte transporters opuCA and betL in *Listeria monocytogenes* after cold and freezing stress.  
1568 *Archives of microbiology* **199**:259–265. DOI: 10.1007/s00203-016-1300-y.
- 1569 Miller MA, Pfeiffer W, Schwartz T. 2010. Creating the CIPRES Science Gateway for inference of  
1570 large phylogenetic trees: 8 pp. DOI: 10.1109/GCE.2010.5676129.
- 1571 Mu W, Starmer J, Shibata Y, Della Yee, Magnuson T. 2017. EZH1 in germ cells safeguards the  
1572 function of PRC2 during spermatogenesis. *DEVELOPMENTAL BIOLOGY* **424**:198–207. DOI:  
1573 10.1016/j.ydbio.2017.02.017.

- 1574 Mu Y, Huo J, Guan Y, Fan D, Xiao X, Wei J, Li Q, Mu P, Ao J, Chen X. 2018. An improved genome  
1575 assembly for *Larimichthys crocea* reveals hepcidin gene expansion with diversified regulation and  
1576 function. *Communications biology* **1**:195. DOI: 10.1038/s42003-018-0207-3.
- 1577 Musilova Z, Cortesi F, Matschiner M, Davies WIL, Patel JS, Stieb SM, Busserolles F de, Malmstrøm  
1578 M, Tørresen OK, Brown CJ, Mountford JK, Hanel R, Stenkamp DL, Jakobsen KS, Carleton KL,  
1579 Jentoft S, Marshall J, Salzburger W. 2019. Vision using multiple distinct rod opsins in deep-sea  
1580 fishes. *Science* **364**:588. DOI: 10.1126/science.aav4632.
- 1581 Neilson ME, Stepien CA. 2009. Evolution and phylogeography of the tubenose goby genus  
1582 *Proterorhinus* (Gobiidae: Teleostei): evidence for new cryptic species. *BIOLOGICAL JOURNAL*  
1583 *OF THE LINNEAN SOCIETY* **96**:664–684. DOI: 10.1111/j.1095-8312.2008.01135.x.
- 1584 Nelson DR. 2003. Comparison of P450s from human and fugu: 420 million years of vertebrate P450  
1585 evolution. *Archives of Biochemistry and Biophysics* **409**:18–24. DOI: 10.1016/S0003-  
1586 9861(02)00553-2.
- 1587 Niimura Y. 2009. On the Origin and Evolution of Vertebrate Olfactory Receptor Genes: Comparative  
1588 Genome Analysis Among 23 Chordate Species. *GENOME BIOLOGY AND EVOLUTION* **1**:34–44.  
1589 DOI: 10.1093/gbe/evp003.
- 1590 Niimura Y. 2012. Olfactory receptor multigene family in vertebrates: From the viewpoint of  
1591 evolutionary genomics. *Current genomics* **13**:103–114. DOI: 10.2174/138920212799860706.
- 1592 Nowoshilow S, Schloissnig S, Fei J-F, Dahl A, Pang AWC, Pippel M, Winkler S, Hastie AR, Young  
1593 G, Roscito JG, et al. 2018. The axolotl genome and the evolution of key tissue formation  
1594 regulators. *NATURE* **554**:50–55. DOI: 10.1038/nature25458.
- 1595 Ocalewicz K, Sapota M. 2011. Cytogenetic characteristics of the round goby *Neogobius*  
1596 *melanostomus* (Pallas, 1814) (Teleostei: Gobiidae: Benthophilinae). *Marine Biology Research*  
1597 **7**:195–201. DOI: 10.1080/17451000.2010.489613.
- 1598 Olsson KH, Johansson S, Blom E-L, Lindström K, Svensson O, Nilsson Sköld H, Kvarnemo C. 2017.  
1599 Dark eyes in female sand gobies indicate readiness to spawn. *PLoS ONE* **12**:e0177714. DOI:  
1600 10.1371/journal.pone.0177714.
- 1601 Paria A, Makesh M, Chaudhari A, Purushothaman CS, Rajendran KV. 2018. Toll-like receptor (TLR)  
1602 22, a non-mammalian TLR in Asian seabass, *Lates calcarifer*: Characterisation, ontogeny and  
1603 inductive expression upon exposure with bacteria and ligands. *Developmental & Comparative*  
1604 *Immunology* **81**:180–186. DOI: 10.1016/j.dci.2017.11.021.
- 1605 Patzner RA, VanTassel J.L., Kovačić M, Kapoor BG (eds). 2011 *The biology of gobies*. Science  
1606 Publishers: Enfield, NH.
- 1607 Pauli A, Valen E, Lin MF, Garber M, Vastenhouw NL, Levin JZ, Fan L, Sandelin A, Rinn JL, Regev  
1608 A, Schier AF. 2012. Systematic identification of long noncoding RNAs expressed during zebrafish  
1609 embryogenesis. *GENOME RESEARCH* **22**:577–591. DOI: 10.1101/gr.133009.111.
- 1610 Peichel CL, Sullivan ST, Liachko I, White MA. 2017. Improvement of the Threespine Stickleback  
1611 Genome Using a Hi-C-Based Proximity-Guided Assembly. *The Journal of heredity* **108**:693–700.  
1612 DOI: 10.1093/jhered/esx058.
- 1613 Pezold FL. 1984. Evidence for multiple sex-chromosomes in THE FRESH-WATER GOBY,  
1614 *GOBIONELLUS-SHUFELDTI* (PISCES, GOBIIDAE). *COPEIA*:235–238.
- 1615 Ponger L, Li W-H. 2005. Evolutionary Diversification of DNA Methyltransferases in Eukaryotic  
1616 Genomes. *MOLECULAR BIOLOGY AND EVOLUTION* **22**:1119–1128. DOI:  
1617 10.1093/molbev/msi098.
- 1618 Prentis PJ, Wilson JRU, Dormontt EE, RICHARDSON DM, Lowe AJ. 2008. Adaptive evolution in  
1619 invasive species. *Trends in Plant Science* **13**:288–294. DOI: 10.1016/j.tplants.2008.03.004.

- 1620 Pysek P, Skalova H, Cuda J, Guo W-Y, Suda J, Dolezal J, Kauzal O, Lambertini C, Lucanova M,  
1621 Mandakova T, et al. 2018. Small genome separates native and invasive populations in an  
1622 ecologically important cosmopolitan grass. *Ecology* **99**:79–90. DOI: 10.1002/ecy.2068.
- 1623 Qi Z, Wang S, Zhu X, Yang Y, Han P, Zhang Q, Zhang S, Shao R, Xu Q, Wei Q. 2018. Molecular  
1624 characterization of three toll-like receptors (TLR21, TLR22, and TLR25) from a primitive ray-  
1625 finned fish Dabry's sturgeon (*Acipenser dabryanus*). *FISH & SHELLFISH IMMUNOLOGY*  
1626 **82**:200–211. DOI: 10.1016/j.fsi.2018.08.033.
- 1627 Quinlan AR, Hall IM. 2010. BEDTools: A flexible suite of utilities for comparing genomic features.  
1628 *BIOINFORMATICS* **26**:841–842. DOI: 10.1093/bioinformatics/btq033.
- 1629 Rambaut A. 2016. Figtree v1.4.3: Tree figure drawing tool.
- 1630 Ranwez V, Harispe S, Delsuc F, Douzery EJP. 2011. MACSE: Multiple Alignment of Coding  
1631 SEquences accounting for frameshifts and stop codons. *PLoS ONE* **6**:e22594. DOI:  
1632 10.1371/journal.pone.0022594.
- 1633 Register EA, Yokoyama R, Yokoyama S. 1994. Multiple origins of the green-sensitive opsin genes in  
1634 fish. *JOURNAL OF MOLECULAR EVOLUTION* **39**:268–273.
- 1635 Reis MIR, do Vale A, Pereira PJB, Azevedo JE, dos Santos NMS. 2012. Caspase-1 and IL-1 beta  
1636 Processing in a Teleost Fish. *PLoS ONE* **7**. DOI: 10.1371/journal.pone.0050450.
- 1637 Rennison DJ, Owens GL, Taylor JS. 2012. Opsin gene duplication and divergence in ray-finned fish.  
1638 *Molecular Phylogenetics and Evolution* **62**:986–1008. DOI: 10.1016/j.ympev.2011.11.030.
- 1639 Richter K, Sagawe S, Hecker A, Küllmar M, Askevold I, Damm J, Heldmann S, Pöhlmann M,  
1640 Ruhrmann S, Sander M, et al. 2018. C-Reactive Protein Stimulates Nicotinic Acetylcholine  
1641 Receptors to Control ATP-Mediated Monocytic Inflammasome Activation. *Frontiers in*  
1642 *immunology* **9**:1604. DOI: 10.3389/fimmu.2018.01604.
- 1643 Riera Romo M, Perez-Martinez D, Castillo Ferrer C. 2016. Innate immunity in vertebrates: An  
1644 overview. *Immunology* **148**:125–139. DOI: 10.1111/imm.12597.
- 1645 Rim JS, Atta MG, Dahl SC, Berry GT, Handler JS, Kwon HM. 1998. Transcription of the  
1646 sodium/myo-inositol cotransporter gene is regulated by multiple tonicity-responsive enhancers  
1647 spread over 50 kilobase pairs in the 5' -flanking region. *JOURNAL OF BIOLOGICAL*  
1648 *CHEMISTRY* **273**:20615–20621.
- 1649 Roche K, Janáč M, Šlapanský L, Mikl L, Kopeček L, Jurajda P. 2015. A newly established round goby  
1650 (*Neogobius melanostomus*) population in the upper stretch of the river Elbe. *Knowl. Manag.*  
1651 *Aquat. Ecosyst.*:33. DOI: 10.1051/kmae/2015030.
- 1652 Roche KF, Janac M, Jurajda P. 2013. A review of Gobiid expansion along the Danube-Rhine corridor  
1653 - geopolitical change as a driver for invasion. *KNOWLEDGE AND MANAGEMENT OF AQUATIC*  
1654 *ECOSYSTEMS*. DOI: 10.1051/kmae/2013066.
- 1655 Rochette NC, Catchen JM. 2017. Deriving genotypes from RAD-seq short-read data using Stacks.  
1656 *NATURE PROTOCOLS* **12**:2640–2659. DOI: 10.1038/nprot.2017.123.
- 1657 Roesti M, Hendry AP, Salzburger W, Berner D. 2012. Genome divergence during evolutionary  
1658 diversification as revealed in replicate lake-stream stickleback population pairs. *Mol Ecol* **21**:2852–  
1659 2862. DOI: 10.1111/j.1365-294X.2012.05509.x.
- 1660 Roesti M, Kueng B, Moser D, Berner D. 2015. The genomics of ecological vicariance in threespine  
1661 stickleback fish. *NATURE COMMUNICATIONS* **6**:8767. DOI: 10.1038/ncomms9767.
- 1662 Ronkin D, Seroussi E, Nitzan T, Doron-Faigenboim A, Cnaani A. 2015. Intestinal transcriptome  
1663 analysis revealed differential salinity adaptation between two tilapiine species. *Comparative*  
1664 *biochemistry and physiology. Part D, Genomics & proteomics* **13**:35–43. DOI:  
1665 10.1016/j.cbd.2015.01.003.
- 1666 Ronquist F, Huelsenbeck JP. 2003. MrBayes 3: Bayesian phylogenetic inference under mixed models.  
1667 *BIOINFORMATICS* **19**:1572–1574. DOI: 10.1093/bioinformatics/btg180.



- 1668 Ronquist F, Teslenko M, van der Mark, Paul, Ayres DL, Darling A, Höhna S, Larget B, Liu L,  
1669 Suchard MA, Huelsenbeck JP. 2012. MrBayes 3.2: efficient Bayesian phylogenetic inference and  
1670 model choice across a large model space. *Systematic biology* **61**:539–542. DOI:  
1671 10.1093/sysbio/sys029.
- 1672 Sacchi R, Gardell AM, Chang N, Kültz D. 2014. Osmotic regulation and tissue localization of the  
1673 myo-inositol biosynthesis pathway in tilapia (*Oreochromis mossambicus*) larvae. *J. Exp. Zool.*  
1674 **321**:457–466. DOI: 10.1002/jez.1878.
- 1675 Sacchi R, Li J, Villarreal F, Gardell AM, Kültz D. 2013. Salinity-induced regulation of the myo-  
1676 inositol biosynthesis pathway in tilapia gill epithelium. *J. Exp. Biol.* **216**:4626. DOI:  
1677 10.1242/jeb.093823.
- 1678 San B, Chrispijn ND, Wittkopp N, van Heeringen SJ, Legendijk AK, Aben M, Bakkens J, Ketting RF,  
1679 Kamminga LM. 2016. Normal formation of a vertebrate body plan and loss of tissue maintenance  
1680 in the absence of *ezh2*. *Scientific reports* **6**:24658. DOI: 10.1038/srep24658.
- 1681 Schwartz YB, Pirrotta V. 2013. A new world of Polycombs: Unexpected partnerships and emerging  
1682 functions. *Nature Reviews Genetics* **14**:853 EP -. DOI: 10.1038/nrg3603.
- 1683 Seehausen O, Terai Y, Magalhaes IS, Carleton KL, Mrosso HDJ, Miyagi R, van der Sluijs I,  
1684 Schneider MV, Maan ME, Tachida H, Imai H, Okada N. 2008. Speciation through sensory drive in  
1685 cichlid fish. *NATURE* **455**:620-U23. DOI: 10.1038/nature07285.
- 1686 Seehausen O, van Alphen JJM, Witte F. 1997. Cichlid Fish Diversity Threatened by Eutrophication  
1687 That Curbs Sexual Selection. *Science* **277**:1808. DOI: 10.1126/science.277.5333.1808.
- 1688 Sievers F, Wilm A, Dineen D, Gibson TJ, Karplus K, Li W, Lopez R, McWilliam H, Remmert M,  
1689 Söding J, et al. 2011. Fast, scalable generation of high-quality protein multiple sequence  
1690 alignments using Clustal Omega. *MOLECULAR SYSTEMS BIOLOGY* **7**:539. DOI:  
1691 10.1038/msb.2011.75.
- 1692 Sigrist CJA, Cerutti L, Castro E de, Langendijk-Genevaux PS, Bulliard V, Bairoch A, Hulo N. 2010.  
1693 PROSITE, a protein domain database for functional characterization and annotation. *NUCLEIC*  
1694 *ACIDS RESEARCH* **38**:D161-6. DOI: 10.1093/nar/gkp885.
- 1695 Smit AFA, Hubley R, Green P. 2008-2015. RepeatModeler Open-1.0.
- 1696 Smit AFA, Hubley R, Green P. 2013-2015. RepeatMasker Open-4.0.
- 1697 Solbakken MH, Tørresen OK, Nederbragt AJ, Seppola M, Gregers TF, Jakobsen KS, Jentoft S. 2016.  
1698 Evolutionary redesign of the Atlantic cod (*Gadus morhua* L.) Toll-like receptor repertoire by gene  
1699 losses and expansions. *Scientific reports* **6**:25211 EP -. DOI: 10.1038/srep25211.
- 1700 Solbakken MH, Voje KL, Jakobsen KS, Jentoft S. 2017. Linking species habitat and past  
1701 palaeoclimatic events to evolution of the teleost innate immune system. *Proceedings. Biological*  
1702 *sciences* **284**. DOI: 10.1098/rspb.2016.2810.
- 1703 Somerville V, Schwaiger M, Hirsch EP, Walser J-C, Bussmann K, Weyrich A, Burkhardt-Holm P,  
1704 Adrian-Kalchhauser I. 2019. *DNA Methylation Patterns in the Round Goby Hypothalamus Support*  
1705 *an On-The-Spot Decision Scenario for Territorial Behavior*.
- 1706 Stamatakis A. 2006. RAxML-VI-HPC: Maximum likelihood-based phylogenetic analyses with  
1707 thousands of taxa and mixed models. *Bioinformatics (Oxford, England)* **22**:2688–2690. DOI:  
1708 10.1093/bioinformatics/btl446.
- 1709 Stamatakis A. 2014. RAxML version 8: A tool for phylogenetic analysis and post-analysis of large  
1710 phylogenies. *Bioinformatics (Oxford, England)* **30**:1312–1313. DOI:  
1711 10.1093/bioinformatics/btu033.
- 1712 Stanke M, Diekhans M, Baertsch R, Haussler D. 2008. Using native and syntenically mapped cDNA  
1713 alignments to improve de novo gene finding. *Bioinformatics (Oxford, England)* **24**:637–644. DOI:  
1714 10.1093/bioinformatics/btn013.

- 1715 Stapley J, Santure AW, Dennis SR. 2015. Transposable elements as agents of rapid adaptation may  
1716 explain the genetic paradox of invasive species. *Mol Ecol* **24**:2241–2252. DOI:  
1717 10.1111/mec.13089.
- 1718 Star B, Nederbragt AJ, Jentoft S, Grimholt U, Malmstrom M, Gregers TF, Rounge TB, Paulsen J,  
1719 Solbakken MH, Sharma A, et al. 2011. The genome sequence of Atlantic cod reveals a unique  
1720 immune system. *NATURE* **477**:207–210. DOI: 10.1038/nature10342.
- 1721 Steinbiss S, Willhoeft U, Gremme G, Kurtz S. 2009. Fine-grained annotation and classification of de  
1722 novo predicted LTR retrotransposons. *NUCLEIC ACIDS RESEARCH* **37**:7002–7013. DOI:  
1723 10.1093/nar/gkp759.
- 1724 Takayama K, Shimoda N, Takanaga S, Hozumi S, Kikuchi Y. 2014. Expression patterns of dnmt3aa,  
1725 dnmt3ab, and dnmt4 during development and fin regeneration in zebrafish. *GENE EXPRESSION*  
1726 *PATTERNS* **14**:105–110. DOI: 10.1016/j.gep.2014.01.005.
- 1727 Thacker CE, Roje DM. 2011. Phylogeny of Gobiidae and identification of gobiid lineages. *Systematics*  
1728 *and Biodiversity* **9**:329–347. DOI: 10.1080/14772000.2011.629011.
- 1729 Thacker CE, Thompson AR, Roje DM. 2011. Phylogeny and evolution of Indo-Pacific shrimp-  
1730 associated gobies (Gobiiformes: Gobiidae). *Molecular Phylogenetics and Evolution* **59**:168–176.  
1731 DOI: 10.1016/j.ympev.2011.02.007.
- 1732 Tierney KB, Kereliuk M, Katare YK, Scott AP, Loeb SJ, Zielinski B. 2012. Invasive male round  
1733 gobies (*Neogobius melanostomus*) release pheromones in their urine to attract females. *Can. J.*  
1734 *Fish. Aquat. Sci.* **70**:393–400. DOI: 10.1139/cjfas-2012-0246.
- 1735 Tørresen OK, Briec MSO, Solbakken MH, Sørhus E, Nederbragt AJ, Jakobsen KS, Meier S,  
1736 Edvardsen RB, Jentoft S. 2018. Genomic architecture of haddock (*Melanogrammus aeglefinus*)  
1737 shows expansions of innate immune genes and short tandem repeats. *BMC GENOMICS* **19**:240.  
1738 DOI: 10.1186/s12864-018-4616-y.
- 1739 Trifinopoulos J, Nguyen L-T, Haeseler A von, Minh BQ. 2016. W-IQ-TREE: A fast online  
1740 phylogenetic tool for maximum likelihood analysis. *NUCLEIC ACIDS RESEARCH* **44**:W232-5.  
1741 DOI: 10.1093/nar/gkw256.
- 1742 Tsutsui ND, Suarez AV, Holway DA, Case TJ. 2000. Reduced genetic variation and the success of an  
1743 invasive species. *Proceedings of the National Academy of Sciences* **97**:5948. DOI:  
1744 10.1073/pnas.100110397.
- 1745 Vélez-Espino LA, Koops MA, Balshine S. 2010. Invasion dynamics of round goby (*Neogobius*  
1746 *melanostomus*) in Hamilton Harbour, Lake Ontario. *BIOLOGICAL INVASIONS* **12**:3861–3875.  
1747 DOI: 10.1007/s10530-010-9777-9.
- 1748 Vigoder FM, Parker DJ, Cook N, Tournière O, Sneddon T, Ritchie MG. 2016. Inducing Cold-  
1749 Sensitivity in the Frigophilic Fly *Drosophila montana* by RNAi. *PLoS ONE* **11**:e0165724. DOI:  
1750 10.1371/journal.pone.0165724.
- 1751 Vojtech LN, Scharping N, Woodson JC, Hansen JD. 2012. Roles of inflammatory caspases during  
1752 processing of zebrafish interleukin-1 $\beta$  in Francisella noatunensis infection. *INFECTIO AND*  
1753 *IMMUNITY* **80**:2878–2885. DOI: 10.1128/IAI.00543-12.
- 1754 Völkel P, Bary A, Raby L, Chapart A, Dupret B, Le Bourhis X, Angrand P-O. 2019. Ezh1 arises from  
1755 Ezh2 gene duplication but its function is not required for zebrafish development. *Scientific reports*  
1756 **9**:4319. DOI: 10.1038/s41598-019-40738-9.
- 1757 Wang F-L, Yan L-X, Shi H-J, Liu X-Y, Zheng Q-Y, Sun L-N, Wang D-S. 2018. Genome-wide  
1758 identification, evolution of DNA methyltransferases and their expression during gonadal  
1759 development in Nile tilapia. *COMPARATIVE BIOCHEMISTRY AND PHYSIOLOGY B-*  
1760 *BIOCHEMISTRY & MOLECULAR BIOLOGY* **226**:73–84. DOI: 10.1016/j.cbpb.2018.08.007.
- 1761 Wang P, Moore BM, Panchy NL, Meng F, Lehti-Shiu MD, Shiu S-H. 2018. Factors Influencing Gene  
1762 Family Size Variation Among Related Species in a Plant Family, Solanaceae. *GENOME BIOLOGY*  
1763 *AND EVOLUTION* **10**:2596–2613. DOI: 10.1093/gbe/evy193.

- 1764 Wang X, Kültz D. 2017. Osmolality/salinity-responsive enhancers (OSREs) control induction of  
1765 osmoprotective genes in euryhaline fish. *PROCEEDINGS OF THE NATIONAL ACADEMY OF*  
1766 *SCIENCES OF THE UNITED STATES OF AMERICA* **114**:E2729-E2738. DOI:  
1767 10.1073/pnas.1614712114.
- 1768 Ward MN, Churcher AM, Dick KJ, Laver CRJ, Owens GL, Polack MD, Ward PR, Breden F, Taylor  
1769 JS. 2008. The molecular basis of color vision in colorful fish: Four long wave-sensitive (LWS)  
1770 opsins in guppies (*Poecilia reticulata*) are defined by amino acid substitutions at key functional  
1771 sites. *BMC EVOLUTIONARY BIOLOGY* **8**:210. DOI: 10.1186/1471-2148-8-210.
- 1772 Waterhouse RM, Seppey M, Simão FA, Manni M, Ioannidis P, Klioutchnikov G, Kriventseva EV,  
1773 Zdobnov EM. 2017. BUSCO Applications from Quality Assessments to Gene Prediction and  
1774 Phylogenomics. *MOLECULAR BIOLOGY AND EVOLUTION* **35**:543–548. DOI:  
1775 10.1093/molbev/msx319.
- 1776 Wellband KW, Heath DD. 2017. Plasticity in gene transcription explains the differential performance  
1777 of two invasive fish species. *Evol Appl* **10**:563–576. DOI: 10.1111/eva.12463.
- 1778 Weyrich A, Benz S, Karl S, Jeschek M, Jewgenow K, Fickel J. 2016. Paternal heat exposure causes  
1779 DNA methylation and gene expression changes of in Wild guinea pig sons. *Ecology and evolution*.  
1780 DOI: 10.1002/ece3.1993.
- 1781 Whitfield AK. 2015. Why are there so few freshwater fish species in most estuaries? *J Fish Biol*  
1782 **86**:1227–1250. DOI: 10.1111/jfb.12641.
- 1783 Wood RK, Crowley E, Martyniuk CJ. 2016. Developmental profiles and expression of the DNA  
1784 methyltransferase genes in the fathead minnow (*Pimephales promelas*) following exposure to di-2-  
1785 ethylhexyl phthalate. *Fish Physiol Biochem* **42**:7–18. DOI: 10.1007/s10695-015-0112-3.
- 1786 Wu C, Di Zhang, Kan M, Lv Z, Zhu A, Su Y, Zhou D, Zhang J, Zhang Z, Xu M, et al. 2014. The draft  
1787 genome of the large yellow croaker reveals well-developed innate immunity. *NATURE*  
1788 *COMMUNICATIONS* **5**. DOI: 10.1038/ncomms6227.
- 1789 Wu N, Zhang S, Li X, Cao Y, Liu X, Wang Q, Liu Q, Liu H, Hu X, Zhou XJ, et al. 2019. Fall  
1790 webworm genomes yield insights into rapid adaptation of invasive species. *Nature ecology &*  
1791 *evolution* **3**:105–115. DOI: 10.1038/s41559-018-0746-5.
- 1792 Xing J, Zhou X, Tang X, Sheng X, Zhan W. 2017. Characterization of Toll-like receptor 22 in turbot  
1793 (*Scophthalmus maximus*). *FISH & SHELLFISH IMMUNOLOGY* **66**:156–162. DOI:  
1794 10.1016/j.fsi.2017.05.025.
- 1795 Xu J, Shao Z, Li D, Xie H, Kim W, Huang J, Taylor JE, Pinello L, Glass K, Jaffe JD, et al. 2015.  
1796 Developmental control of polycomb subunit composition by GATA factors mediates a switch to  
1797 non-canonical functions. *Molecular cell* **57**:304–316. DOI: 10.1016/j.molcel.2014.12.009.
- 1798 Xu Z, Wang H. 2007. LTR\_FINDER: An efficient tool for the prediction of full-length LTR  
1799 retrotransposons. *NUCLEIC ACIDS RESEARCH* **35**:W265-W268. DOI: 10.1093/nar/gkm286.
- 1800 Yan J, Cai Z. 2010. Molecular evolution and functional divergence of the cytochrome P450 3 (CYP3)  
1801 Family in Actinopterygii (ray-finned fish). *PLoS ONE* **5**:e14276. DOI:  
1802 10.1371/journal.pone.0014276.
- 1803 Yokoyama C, Yabuki T, Inoue H, Tone Y, Hara S, Hatae T, Nagata M, Takahashi E-I, Tanabe T.  
1804 1996. Human Gene Encoding Prostacyclin Synthase (PTGIS): Genomic Organization,  
1805 Chromosomal Localization, and Promoter Activity. *Genomics* **36**:296–304. DOI:  
1806 10.1006/geno.1996.0465.
- 1807 Yokoyama S. 2008. Evolution of dim-light and color vision pigments. In *Linkage disequilibrium and*  
1808 *association mapping*, Weir BS (ed); 259–282.
- 1809 You X, Bian C, Zan Q, Xu X, Liu X, Chen J, Wang J, Qiu Y, Li W, Zhang X, et al. 2014. Mudskipper  
1810 genomes provide insights into the terrestrial adaptation of amphibious fishes. *NATURE*  
1811 *COMMUNICATIONS* **5**. DOI: 10.1038/ncomms6594.



- 1812 Young JAM, Marentette JR, Gross C, McDonald JI, Verma A, Marsh-Rollo SE, Macdonald PDM,  
1813 Earn DJD, Balshine S. 2010. Demography and substrate affinity of the round goby (*Neogobius*  
1814 *melanostomus*) in Hamilton Harbour. *JOURNAL OF GREAT LAKES RESEARCH* **36**:115–122.  
1815 DOI: 10.1016/j.jglr.2009.11.001.
- 1816 Zamudio N, Barau J, Teissandier A, Walter M, Borsos M, Servant N, Bourc'his D. 2015. DNA  
1817 methylation restrains transposons from adopting a chromatin signature permissive for meiotic  
1818 recombination. *Genes & development* **29**:1256–1270. DOI: 10.1101/gad.257840.114.
